# Supplementary material
Source: PubMed Central journal article supplement (PMC5135227)
Supplement: ja6b08104_si_001.pdf [file ja6b08104_si_001.pdf]

Supporting information for:

**Addition of Carbon–Fluorine Bonds to a Mg(I)–Mg(I) bond:  
An Equivalent of Grignard Formation in Solution**

Clare Bakewell, Andrew J. P. White, Mark R. Crimmin

## Table of Contents

|   |                                               |     |
|---|-----------------------------------------------|-----|
| 1 | General Experimental                          | S3  |
| 2 | Synthetic Procedures                          | S4  |
| 3 | Variable Temperature $^{19}\text{F}$ NMR Data | S13 |
| 4 | X-ray Data                                    | S16 |
| 5 | DFT Data                                      | S23 |
| 6 | Z Matrices                                    | S28 |
| 7 | Multinuclear NMR Data                         | S53 |

## 1. General Experimental

All manipulations were carried out using standard Schlenk-line and glovebox techniques under an inert atmosphere of argon or dinitrogen. A MBraun Labmaster glovebox was employed, operating at  $< 0.1$  ppm  $O_2$  and  $< 0.1$  ppm  $H_2O$ . Solvents were dried over activated alumina from an SPS (solvent purification system) based upon the Grubbs design and degassed before use. Glassware was dried for 12 h at  $120$  °C prior to use. Benzene- $d_6$  and toluene- $d_8$  were stored over molecular sieves and distilled prior to use. NMR-scale reactions were conducted in J. Young's tap tubes and prepared in a glovebox. All heating mentioned was done using silicone oil baths.  $^1H$ ,  $^{19}F$  and  $^{13}C$ , NMR spectra were obtained on BRUKER 400 MHz or 500 MHz machines unless otherwise stated; all peak intensities are derived internal standard peak with values quoted in ppm. Data was processed using the MestReNova or Topspin software. Carbon-13 NMR data for magnesium fluoroaryl complexes has been assigned to the highest reasonable standard, given the resolution of the data obtained for  $^{13}C\{^1H\}$  nuclei coupling to multiple  $^{19}F$  nuclei ( $I=1/2$ ) and quadrupolar  $^{25}Mg$  nuclei ( $I = 5/2$ ). For reactions containing multiple regioisomers  $^{13}C\{^1H\}$  NMR data has not been reported. In these cases, further verification of the structures is given by protonation of the Mg-C bond to form hydrodefluorination products which have been compared to genuine synthetic or commercial samples.  $C^{IV}$  refers to quaternary carbons.

Fluorocarbons, where liquids at  $25$  °C were dried over activated molecular sieves and freeze-pump-thaw degassed before use. All other other chemicals were purchased from Fluorochem, Sigma Aldrich or Alfa Aesar and used without purification unless stated.  $BDIH$ ,  $^{Mes}BDIH$ ,<sup>i</sup>  $BDIMg-MgBDI$ ,<sup>ii</sup> and  $^{Mes}BDIMg-MgBDI^{Mes}$ ,<sup>iii</sup> where prepared by literature procedures. *N,N*-Dimethylamino pentafluorobenzene was prepared by alkylation of the corresponding aniline according to the literature procedure.<sup>iv</sup>

## 2. Synthetic Procedures

### 2.1 General procedures for the oxidative addition of carbon–fluorine bonds to Mg–Mg:

**NMR scale:** *BDIMg–MgBDI* (10 mg, 0.011 mmol) was dissolved in benzene-*d*<sub>6</sub> (0.6 mL) and the solution transferred into a Young's tap NMR tube equipped with a capillary tube containing a ferrocene standard solution; a *t*=0 <sup>1</sup>H NMR spectrum was recorded. The fluoroarene (0.11 mmol, 10 equiv.) was added using a micropipette and the reaction mixture was monitored by <sup>1</sup>H and <sup>19</sup>F NMR spectroscopy. NMR yields were recorded by comparison against the ferrocene internal standard,  $\delta = 4.00$  ppm.

**Preparative scale (2a–j):** *BDIMg–MgBDI* (100 mg, 0.11 mmol, approx. 0.03 M) was dissolved in toluene (4 mL) and the fluoroarene (0.11 mmol, 1 equiv. for non-volatile substrates **2d–g**; 0.16 mmol, 1.5 equiv. for volatile substrates **2a–c**, **2h–j**) was added at 25 °C. After stirring the reaction mixture at this temperature for 24–48 h, tetrahydrofuran (0.1 mL) was added and the solution was transferred to the freezer. Crystals of  $[BDIMg(\mu-F)(THF)]_2$  formed after overnight standing at -35 °C and were isolated by filtration.<sup>v</sup> The solvent was removed from the resultant supernatant under reduced pressure and the crude product extracted into n-hexane (2 mL). Complexes **2a–j** were isolated as solids by either removing the solvent, or following crystallization or precipitation by storage of the solutions at -35 °C.

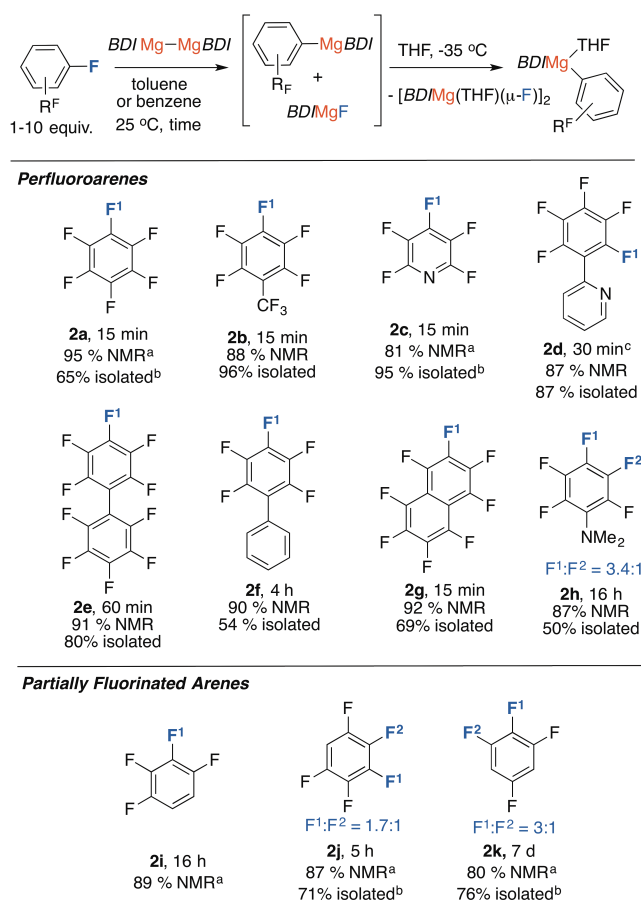

<sup>a,b</sup>The fluorine highlighted in blue is that of the carbon–fluorine bond that transforms to a carbon–magnesium bond, for regioisomeric products F<sup>1</sup> is the major and F<sup>2</sup> the minor product.<sup>c</sup>Isolated without THF coordinated.

**Table S1.** Scope of the carbon–fluorine bond functionalization procedure.



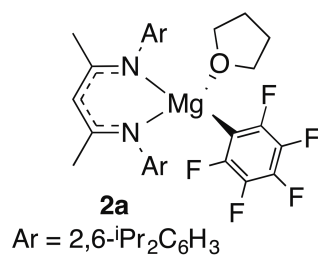

**Compound 2a** (50 mg, 0.07 mmol, 65 %<sup>vi</sup>): <sup>1</sup>H NMR (400 MHz, benzene-*d*<sub>6</sub>, 298 K) δ (ppm): 0.82 (d, 6H, CH(CH<sub>3</sub>)<sub>2</sub>, <sup>3</sup>J<sub>HH</sub> = 6.8 Hz), 1.01 (bm, 4H, O(CH<sub>2</sub>)<sub>2</sub>(CH<sub>2</sub>)<sub>2</sub>), 1.12 (d, 6H, CH(CH<sub>3</sub>)<sub>2</sub>, <sup>3</sup>J<sub>HH</sub> = 6.8 Hz), 1.15 (d, 6H, CH(CH<sub>3</sub>)<sub>2</sub>, <sup>3</sup>J<sub>HH</sub> = 6.8 Hz), 1.19 (d, 6H, CH(CH<sub>3</sub>)<sub>2</sub>, <sup>3</sup>J<sub>HH</sub> = 6.8 Hz), 1.68 (s, 6H, CH<sub>3</sub>), 3.17 (bm, 4H, O(CH<sub>2</sub>)<sub>2</sub>(CH<sub>2</sub>)<sub>2</sub>), 3.25 (sept, 2H, CH(CH<sub>3</sub>)<sub>2</sub>, <sup>3</sup>J<sub>HH</sub> = 6.8 Hz), 3.33 (sept, 2H, CH(CH<sub>3</sub>)<sub>2</sub>, <sup>3</sup>J<sub>HH</sub> = 6.8 Hz), 4.99 (s, 1H, CH), 7.00-7.13 (m, 6H, CH); <sup>19</sup>F NMR (376.5 MHz, benzene-*d*<sub>6</sub>, 298 K) δ (ppm): -161.9 – -161.5 (m, 2F, *m*-C<sub>6</sub>F<sub>5</sub>), -157.7 (t, 1F, *p*-C<sub>6</sub>F<sub>5</sub>, <sup>3</sup>J<sub>FF</sub> = 19.2 Hz), -112.7 (bs, 2F, *o*-C<sub>6</sub>F<sub>5</sub>); <sup>13</sup>C{<sup>1</sup>H} NMR (100 MHz, benzene-*d*<sub>6</sub>, 298 K) δ (ppm): 24.3 (CH<sub>3</sub>), 24.6 (2 x CH<sub>3</sub>), 24.6 (CH<sub>3</sub>), 24.8 (CH<sub>3</sub>), 24.9 (O(CH<sub>2</sub>)<sub>2</sub>(CH<sub>2</sub>)<sub>2</sub>), 27.9 (CH(CH<sub>3</sub>)<sub>2</sub>), 28.3 (CH(CH<sub>3</sub>)<sub>2</sub>), 69.6 (O(CH<sub>2</sub>)<sub>2</sub>(CH<sub>2</sub>)<sub>2</sub>), 95.5 (C(CH<sub>3</sub>)CHC(CH<sub>3</sub>)), 123.6 (CH), 124.5 (CH), 125.6 (CH), 136.6 (dm, CF, C<sub>6</sub>F<sub>5</sub>, *J* = 200.0 Hz), 139.9 (bd, CF, C<sub>6</sub>F<sub>5</sub>, *J* = 244.0 Hz), 142.1 (C<sup>IV</sup>), 143.6 (C<sup>IV</sup>), 145.4 (C<sup>IV</sup>), 151.1 (dm, CF, C<sub>6</sub>F<sub>5</sub>, *J* = 219.0 Hz), 169.2 (C=N), *ipso* C<sup>IV</sup> not observed; Anal. Calc. (MgC<sub>39</sub>H<sub>49</sub>F<sub>5</sub>N<sub>2</sub>O): C, 68.77; H, 7.25; N, 4.11. Found: C, 68.63; H, 7.29; N, 4.13.

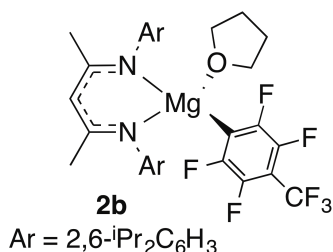

**Compound 2b** (79 mg, 0.11 mmol, 96 %): <sup>1</sup>H NMR (400 MHz, benzene-*d*<sub>6</sub>, 298 K) δ (ppm): 0.79 (d, 6H, CH(CH<sub>3</sub>)<sub>2</sub>, <sup>3</sup>J<sub>HH</sub> = 6.8 Hz), 0.99 (bm, 4H, O(CH<sub>2</sub>)<sub>2</sub>(CH<sub>2</sub>)<sub>2</sub>), 1.09 (d, 6H, CH(CH<sub>3</sub>)<sub>2</sub>, <sup>3</sup>J<sub>HH</sub> = 6.8 Hz), 1.13 (d, 6H, CH(CH<sub>3</sub>)<sub>2</sub>, <sup>3</sup>J<sub>HH</sub> = 6.8 Hz), 1.18 (d, 6H, CH(CH<sub>3</sub>)<sub>2</sub>, <sup>3</sup>J<sub>HH</sub> = 6.8 Hz), 1.67 (s, 6H, CH<sub>3</sub>), 3.14 (bm, 4H, O(CH<sub>2</sub>)<sub>2</sub>(CH<sub>2</sub>)<sub>2</sub>), 3.23 (sept, 2H, CH(CH<sub>3</sub>)<sub>2</sub>, <sup>3</sup>J<sub>HH</sub> = 6.8 Hz), 3.28 (sept, 2H, CH(CH<sub>3</sub>)<sub>2</sub>, <sup>3</sup>J<sub>HH</sub> = 6.8 Hz), 4.98 (s, 1H, CH), 7.02 (m, 2H, CH), 7.09 (m, 4H, CH); <sup>19</sup>F NMR (376.5 MHz, benzene-*d*<sub>6</sub>, 298 K) δ (ppm): -142.2 – -141.8 (m, 2F, *m*-C<sub>6</sub>F<sub>4</sub>CF<sub>3</sub>), -112.5 (bs, 2F, *o*-C<sub>6</sub>F<sub>4</sub>CF<sub>3</sub>), -55.8 (t, 3F, C<sub>6</sub>F<sub>4</sub>CF<sub>3</sub>, <sup>4</sup>J<sub>FF</sub> = 21.4 Hz); <sup>13</sup>C{<sup>1</sup>H} NMR (100 MHz, benzene-*d*<sub>6</sub>, 298 K) δ (ppm): 24.2 (CH<sub>3</sub>), 24.5 (CH<sub>3</sub>), 24.5 (CH<sub>3</sub>), 24.6 (CH<sub>3</sub>), 24.7 (CH<sub>3</sub>), 24.9 (O(CH<sub>2</sub>)<sub>2</sub>(CH<sub>2</sub>)<sub>2</sub>), 27.9 (CH(CH<sub>3</sub>)<sub>2</sub>), 28.3 (CH(CH<sub>3</sub>)<sub>2</sub>), 69.7 (O(CH<sub>2</sub>)<sub>2</sub>(CH<sub>2</sub>)<sub>2</sub>), 95.6 (C(CH<sub>3</sub>)CHC(CH<sub>3</sub>)), 123.6 (CH), 124.5 (CH), 125.6 (CH), 143.0 (dd, CF, C<sub>6</sub>F<sub>4</sub>CF<sub>3</sub>, *J* = 263.2 Hz), 142.1 (C<sup>IV</sup>), 143.5 (C<sup>IV</sup>), 145.2 (C<sup>IV</sup>), 151.1 (dm, CF, C<sub>6</sub>F<sub>4</sub>CF<sub>3</sub>, *J* = 218.5 Hz), 169.4 (C=N), *ipso* C<sup>IV</sup>, *para* C<sup>IV</sup> and CF<sub>3</sub> not observed; Anal. Calc. (MgC<sub>49</sub>H<sub>49</sub>F<sub>7</sub>N<sub>2</sub>O): C, 65.71; H, 6.76; N, 3.83. Found: C, 65.60; H, 6.82; N, 3.94.

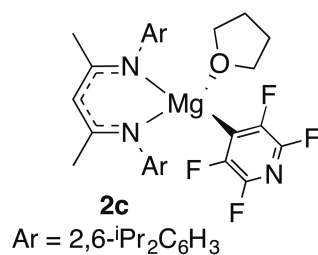

**Compound 2c** (71 mg, 0.11 mmol, 95 %): <sup>1</sup>H NMR (400 MHz, benzene-*d*<sub>6</sub>, 298 K) δ (ppm): 0.75 (d, 6H, CH(CH<sub>3</sub>)<sub>2</sub>, <sup>3</sup>J<sub>HH</sub> = 6.8 Hz), 0.96 (bm, 4H, O(CH<sub>2</sub>)<sub>2</sub>(CH<sub>2</sub>)<sub>2</sub>), 1.07 (d, 6H, CH(CH<sub>3</sub>)<sub>2</sub>, <sup>3</sup>J<sub>HH</sub> = 6.8 Hz), 1.13 (d, 6H, CH(CH<sub>3</sub>)<sub>2</sub>, <sup>3</sup>J<sub>HH</sub> = 6.8 Hz), 1.18 (d, 6H, CH(CH<sub>3</sub>)<sub>2</sub>, <sup>3</sup>J<sub>HH</sub> = 6.8 Hz), 1.67 (s, 6H, CH<sub>3</sub>), 3.28 (bm, 4H, O(CH<sub>2</sub>)<sub>2</sub>(CH<sub>2</sub>)<sub>2</sub>), 3.24 (sept, 4H, <sup>3</sup>J<sub>HH</sub> = 6.4 Hz), 4.98 (s, 1H, CH), 6.98-7.03 (m, 2H, CH), 7.00-7.09 (m, 4H, CH); <sup>19</sup>F NMR (376.5 MHz, benzene-*d*<sub>6</sub>, 298 K) δ (ppm): -119.4 (bs, 2F, *o*-C<sub>5</sub>F<sub>4</sub>N), -97.9 – -97.5 (m, 2F, *m*-C<sub>5</sub>F<sub>4</sub>N); <sup>13</sup>C {<sup>1</sup>H} NMR (100 MHz, benzene-*d*<sub>6</sub>, 298 K) δ (ppm): 24.2 (CH<sub>3</sub>), 24.4 (CH<sub>3</sub>), 24.5 (CH<sub>3</sub>), 24.6 (CH<sub>3</sub>), 24.9 (O(CH<sub>2</sub>)<sub>2</sub>(CH<sub>2</sub>)<sub>2</sub>), 24.9 (CH<sub>3</sub>), 27.8 (CH(CH<sub>3</sub>)<sub>2</sub>), 28.3 (CH(CH<sub>3</sub>)<sub>2</sub>), 69.7 (O(CH<sub>2</sub>)<sub>2</sub>(CH<sub>2</sub>)<sub>2</sub>), 95.6 (C(CH<sub>3</sub>)CHC(CH<sub>3</sub>)), 123.6 (CH), 124.5 (CH), 125.6 (CH), 142.0 (C<sup>IV</sup>), 143.4 (ddd, CF, C<sub>5</sub>F<sub>4</sub>N, *J* = 198.0 Hz, *J* = 24.0 Hz, *J* = 6.0 Hz), 143.5 (C<sup>IV</sup>), 145.1 (C<sup>IV</sup>), 147.3 (dm, CF, C<sub>5</sub>F<sub>4</sub>N, *J* = 185.0 Hz), 154.7 (t, C<sup>IV</sup>, C<sub>5</sub>F<sub>4</sub>N, *J* = 63.0 Hz), 169.4 (C=N); Anal. Calc. (MgC<sub>38</sub>H<sub>49</sub>F<sub>4</sub>N<sub>3</sub>O): C, 68.72; H, 7.44; N, 6.33. Found: C, 68.60; H, 7.58; N, 6.22.

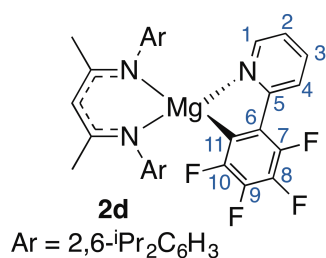

**Compound 2d** (66 mg, 0.10 mmol, 87 %): <sup>1</sup>H NMR (400 MHz, benzene-*d*<sub>6</sub>, 298 K) δ (ppm): 0.26 (d, 6H, CH(CH<sub>3</sub>)<sub>2</sub>, <sup>3</sup>J<sub>HH</sub> = 6.8 Hz), 1.13 (d, 6H, CH(CH<sub>3</sub>)<sub>2</sub>, <sup>3</sup>J<sub>HH</sub> = 6.8 Hz), 1.29 (d, 6H, CH(CH<sub>3</sub>)<sub>2</sub>, <sup>3</sup>J<sub>HH</sub> = 6.8 Hz), 1.57 (d, 6H, CH(CH<sub>3</sub>)<sub>2</sub>, <sup>3</sup>J<sub>HH</sub> = 6.8 Hz), 1.73 (s, 6H, CH<sub>3</sub>), 2.90 (sept, 2H, CH(CH<sub>3</sub>)<sub>2</sub>, <sup>3</sup>J<sub>HH</sub> = 6.8 Hz), 3.65 (sept, 2H, CH(CH<sub>3</sub>)<sub>2</sub>, <sup>3</sup>J<sub>HH</sub> = 6.8 Hz), 4.95 (s, 1H, CH), 6.38 (ddd, 1H, Py-C<sup>2</sup>H), 6.88 (dd, 2H, ArH, <sup>3</sup>J<sub>HH</sub> = 7.6 Hz, <sup>4</sup>J<sub>HH</sub> = 1.6 Hz), 6.92 (m, 1H, Py-C<sup>3</sup>H), 6.99 (t, 2H, ArH, <sup>3</sup>J<sub>HH</sub> = 7.6 Hz), 7.14 (dd, 2H, ArH, <sup>3</sup>J<sub>HH</sub> = 7.6 Hz, <sup>4</sup>J<sub>HH</sub> = 1.6 Hz), 7.88 (dm, 1H, Py-C<sup>4</sup>H, <sup>3</sup>J<sub>HH</sub> = 8.4 Hz), 8.31 (dm, 1H, Py-C<sup>1</sup>H, <sup>3</sup>J<sub>HH</sub> = 4.8 Hz); <sup>19</sup>F NMR (376.5 MHz, benzene-*d*<sub>6</sub>, 298 K) δ (ppm): -157.7 (t, 1F, *m*<sup>b</sup>-C<sub>6</sub>F<sub>4</sub>), -150.3 – -150.0 (m, 1F, *p* or *m*<sup>a</sup>-C<sub>6</sub>F<sub>4</sub>), -136.5 – -136.3 (m, 1F, *p* or *m*<sup>a</sup>-C<sub>6</sub>F<sub>4</sub>), -106.8 – 106.5 (m, 1F, *o*-C<sub>6</sub>F<sub>4</sub>); <sup>13</sup>C {<sup>1</sup>H} NMR (100 MHz, benzene-*d*<sub>6</sub>, 298 K) δ (ppm): 23.5 (CH(CH<sub>3</sub>)<sub>2</sub>), 23.7 (2 x CH<sub>3</sub>), 24.0 (d, CH(CH<sub>3</sub>)<sub>2</sub>, *J* = 3.5 Hz<sup>viii</sup>), 24.1 (CH(CH<sub>3</sub>)<sub>2</sub>), 24.3 (CH(CH<sub>3</sub>)<sub>2</sub>), 27.7 (C<sup>A</sup>H(CH<sub>3</sub>)<sub>2</sub>), 29.1 (C<sup>B</sup>H(CH<sub>3</sub>)<sub>2</sub>), 94.2 (C(CH<sub>3</sub>)CHC(CH<sub>3</sub>)), 122.2 (C<sup>2</sup>H, C<sub>5</sub>H<sub>4</sub>N), 123.4 (CH), 123.7 (CH), 124.0 (d, C<sup>4</sup>H, C<sub>5</sub>H<sub>4</sub>N, *J* = 22.4 Hz), 125.4 (CH), 140.1 (C<sup>3</sup>H, C<sub>5</sub>H<sub>4</sub>N), 141.7 (C<sup>IV</sup>), 142.2 (C<sup>IV</sup>), 144.2 (C<sup>IV</sup>), 147.4 (C<sup>1</sup>H, C<sub>5</sub>H<sub>4</sub>N), 169.4 (C=N), CF and C<sup>IV</sup> signals 5-11 could not be identified; Anal. Calc. (MgC<sub>40</sub>H<sub>45</sub>F<sub>4</sub>N<sub>3</sub>): C, 71.91; H, 6.79; N, 3.64. Found: C, 71.78; H, 6.68; N, 6.44.

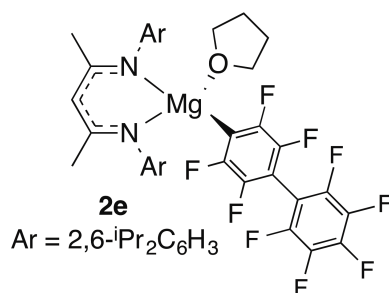

**Compound 2e** (75 mg, 0.09 mmol, 80 %): <sup>1</sup>H NMR (400 MHz, benzene-*d*<sub>6</sub>, 298 K) δ (ppm): 0.96 (d, 6H, CH(CH<sub>3</sub>)<sub>2</sub>, <sup>3</sup>J<sub>HH</sub> = 6.8 Hz), 1.03 (bm, 4H, O(CH<sub>2</sub>)<sub>2</sub>(CH<sub>2</sub>)<sub>2</sub>), 1.18 (d, 12H, CH(CH<sub>3</sub>)<sub>2</sub>, <sup>3</sup>J<sub>HH</sub> = 6.8 Hz), 1.22 (d, 6H, CH(CH<sub>3</sub>)<sub>2</sub>, <sup>3</sup>J<sub>HH</sub> = 6.8 Hz), 1.72 (s, 6H, CH<sub>3</sub>), 3.22 (bm, 4H, O(CH<sub>2</sub>)<sub>2</sub>(CH<sub>2</sub>)<sub>2</sub>), 3.29 (sept, 2H, CH(CH<sub>3</sub>)<sub>2</sub>, <sup>3</sup>J<sub>HH</sub> = 6.8 Hz), 3.43 (sept, 2H, CH(CH<sub>3</sub>)<sub>2</sub>, <sup>3</sup>J<sub>HH</sub> = 6.8 Hz), 5.04 (s, 1H, CH), 7.00-7.14 (m, 6H, CH); <sup>19</sup>F NMR (376.5 MHz, benzene-*d*<sub>6</sub>, 298 K) δ (ppm): -162.1 – -161.8 (m, 2F, -C<sub>6</sub>F<sub>4</sub>-*m*-C<sub>6</sub>F<sub>5</sub>), -155.0 (t, 1F, <sup>3</sup>J<sub>FF</sub> = 21.4 Hz, -C<sub>6</sub>F<sub>4</sub>-*p*-C<sub>6</sub>F<sub>5</sub>), -140.2 – -139.8 (m, 2F, *m*-C<sub>6</sub>F<sub>4</sub>-C<sub>6</sub>F<sub>5</sub>), -139.6 – -139.4 (m, 2F, -C<sub>6</sub>F<sub>4</sub>-*o*-C<sub>6</sub>F<sub>5</sub>), -113.1 (bs, 2F, *o*-C<sub>6</sub>F<sub>4</sub>-C<sub>6</sub>F<sub>5</sub>); <sup>13</sup>C {<sup>1</sup>H} NMR (100 MHz, benzene-*d*<sub>6</sub>, 298 K) δ (ppm): 24.3 (CH<sub>3</sub>), 24.6 (CH<sub>3</sub>), 24.7 (CH<sub>3</sub>), 24.8 (CH<sub>3</sub>), 25.0 (O(CH<sub>2</sub>)<sub>2</sub>(CH<sub>2</sub>)<sub>2</sub>), 28.0 (CH(CH<sub>3</sub>)<sub>2</sub>), 28.4 (CH(CH<sub>3</sub>)<sub>2</sub>), 69.7 (O(CH<sub>2</sub>)<sub>2</sub>(CH<sub>2</sub>)<sub>2</sub>), 95.6 (C(CH<sub>3</sub>)CHC(CH<sub>3</sub>)), 103.7 (t, C<sub>12</sub>F<sub>9</sub>, C<sup>IV</sup>, J = 20.0 Hz), 105.0 (t, C<sub>12</sub>F<sub>9</sub>, C<sup>IV</sup>, J = 22.1 Hz), 123.6 (CH), 124.6 (CH), 125.6 (CH), 137.8 (dm, C<sub>12</sub>F<sub>9</sub>, CF, J = 255.0 Hz), 142.1 (C<sup>IV</sup>), 143.1 (dm, C<sub>12</sub>F<sub>9</sub>, CF, J = 256.0 Hz), 143.6 (C<sup>IV</sup>), 145.4 (C<sup>IV</sup>), 150.2 (dm, C<sub>12</sub>F<sub>9</sub>, CF, J = 220.0 Hz), 169.3 (C=N), assignment of the remaining three C<sup>IV</sup> and CF signals was not possible due to complicated <sup>13</sup>C-<sup>19</sup>F coupling; Anal. Calc. (MgC<sub>45</sub>H<sub>49</sub>F<sub>9</sub>N<sub>2</sub>O): C, 65.18; H, 5.96; N, 3.38. Found: C, 65.07; H, 6.16; N, 3.47.

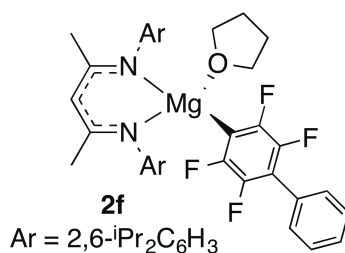

**Compound 2f** (45 mg, 0.06 mmol, 54 %<sup>viii</sup>): <sup>1</sup>H NMR (400 MHz, benzene-*d*<sub>6</sub>, 298 K) δ (ppm): 0.98 (d, 6H, CH(CH<sub>3</sub>)<sub>2</sub>, <sup>3</sup>J<sub>HH</sub> = 6.4 Hz), 1.0 (bm, 4H, O(CH<sub>2</sub>)<sub>2</sub>(CH<sub>2</sub>)<sub>2</sub>), 1.15-1.27 (m, 18H, CH(CH<sub>3</sub>)<sub>2</sub>), 1.73 (s, 6H, CH<sub>3</sub>), 3.28 (bm and sept, 6H, O(CH<sub>2</sub>)<sub>2</sub>(CH<sub>2</sub>)<sub>2</sub> and CH(CH<sub>3</sub>)<sub>2</sub>), 3.50 (sept, 2H, CH(CH<sub>3</sub>)<sub>2</sub>, <sup>3</sup>J<sub>HH</sub> = 6.4 Hz), 5.04 (s, 1H, CH), 7.06-7.15 (m, 9H, CH), 7.57 (dm, 2H, <sup>3</sup>J<sub>HH</sub> = 6.8 Hz); <sup>19</sup>F NMR (376.5 MHz, benzene-*d*<sub>6</sub>, 298 K) δ (ppm): -145.1 – -144.8 (m, 2F, *m*-C<sub>6</sub>F<sub>4</sub>-C<sub>6</sub>H<sub>5</sub>), -113.9 (bs, 2F, *o*-C<sub>6</sub>F<sub>4</sub>-C<sub>6</sub>H<sub>5</sub>); <sup>13</sup>C {<sup>1</sup>H} NMR (100 MHz, benzene-*d*<sub>6</sub>, 298 K) δ (ppm): 24.3 (CH<sub>3</sub>), 24.7 (3 x CH<sub>3</sub>), 24.9 (CH<sub>3</sub>), 24.9 (O(CH<sub>2</sub>)<sub>2</sub>(CH<sub>2</sub>)<sub>2</sub>), 28.0 (CH(CH<sub>3</sub>)<sub>2</sub>), 28.4 (CH(CH<sub>3</sub>)<sub>2</sub>), 69.7 (O(CH<sub>2</sub>)<sub>2</sub>(CH<sub>2</sub>)<sub>2</sub>), 95.5 (C(CH<sub>3</sub>)CHC(CH<sub>3</sub>)), 119.3 (t, C<sup>IV</sup>, C<sub>12</sub>F<sub>4</sub>H<sub>5</sub>, J = 17.0 Hz), 123.6 (CH), 124.5 (CH), 125.5 (CH), 128.2 (CH), 128.6 (CH), 130.8 (CH), 134.7 (t, C<sup>IV</sup>, C<sub>12</sub>F<sub>4</sub>H<sub>5</sub>, J = 86.0 Hz), 142.1 (C<sup>IV</sup>), 143.3 (dm, CF, C<sub>12</sub>F<sub>4</sub>H<sub>5</sub>, J = 251.0 Hz), 143.7 (C<sup>IV</sup>), 145.6 (C<sup>IV</sup>), 151.6 (dm, CF, C<sub>12</sub>F<sub>4</sub>H<sub>5</sub>, J = 218.0 Hz), 169.1 (C(CH<sub>3</sub>)CHC(CH<sub>3</sub>)), *ipso* C<sup>IV</sup> signal could not be assigned; Anal. Calc. (MgC<sub>45</sub>H<sub>54</sub>F<sub>4</sub>N<sub>2</sub>O): C, 73.12; H, 7.36; N, 3.79. Found: C, 72.99; H, 7.45; N, 3.83.

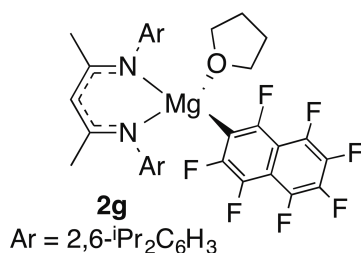

**Compound 2g** (60 mg, 0.08 mmol, 69 %): <sup>1</sup>H NMR (400 MHz, benzene-*d*<sub>6</sub>, 298 K) δ (ppm): 0.79 (d, 6H, CH(CH<sub>3</sub>)<sub>2</sub>, <sup>3</sup>J<sub>HH</sub> = 6.8 Hz), 0.99 (bm, 4H, O(CH<sub>2</sub>)<sub>2</sub>(CH<sub>2</sub>)<sub>2</sub>), 1.09 (d, 6H, CH(CH<sub>3</sub>)<sub>2</sub>, <sup>3</sup>J<sub>HH</sub> = 6.8 Hz), 1.13 (d, 6H, CH(CH<sub>3</sub>)<sub>2</sub>, <sup>3</sup>J<sub>HH</sub> = 6.8 Hz), 1.18 (d, 6H, CH(CH<sub>3</sub>)<sub>2</sub>, <sup>3</sup>J<sub>HH</sub> = 6.8 Hz), 1.67 (s, 6H, CH<sub>3</sub>), 3.28 (m, 6H, CH(CH<sub>3</sub>)<sub>2</sub> and O(CH<sub>2</sub>)<sub>2</sub>(CH<sub>2</sub>)<sub>2</sub>), 3.41 (bs, 2H, CH(CH<sub>3</sub>)<sub>2</sub>), 5.00 (s, 1H, CH), 7.00-7.12 (m, 6H, CH); <sup>19</sup>F NMR (376.5 MHz, benzene-*d*<sub>6</sub>, 298 K) δ (ppm): -160.5 – -160.3 (m, 1F, C<sub>10</sub>F<sub>7</sub>), -159.0 – -158.6 (m, 1F, C<sub>10</sub>F<sub>7</sub>), -154.2 – -153.7 (m, 1F, C<sub>10</sub>F<sub>7</sub>), -148.8 – -148.4 (m, 1F, C<sub>10</sub>F<sub>7</sub>), -146.7 – -146.1 (m, 1F, C<sub>10</sub>F<sub>7</sub>), -107.7 (bs, 1F, *o*-C<sub>10</sub>F<sub>7</sub>), -90.7 (bs, 1F, *o*-C<sub>10</sub>F<sub>7</sub>); <sup>13</sup>C{<sup>1</sup>H} NMR (100 MHz, benzene-*d*<sub>6</sub>, 298 K) δ (ppm): 24.3 (CH<sub>3</sub>), 24.6 (2 x CH<sub>3</sub>), 24.7 (CH<sub>3</sub>), 24.8 (CH<sub>3</sub>), 25.0 (O(CH<sub>2</sub>)<sub>2</sub>(CH<sub>2</sub>)<sub>2</sub>), 28.0 (CH(CH<sub>3</sub>)<sub>2</sub>), 28.3 (CH(CH<sub>3</sub>)<sub>2</sub>), 69.7 (O(CH<sub>2</sub>)<sub>2</sub>(CH<sub>2</sub>)<sub>2</sub>), 95.7 (C(CH<sub>3</sub>)CHC(CH<sub>3</sub>)), 123.7 (CH), 124.4 (CH), 125.6 (CH), 142.1 (C<sup>IV</sup>), 143.4 (C<sup>IV</sup>), 145.5 (C<sup>IV</sup>), 169.6 (C=N), <sup>13</sup>C resonances for the fluoroaryl unit could not be assigned; Due to the low purity of this complex attempts to acquire satisfactory CHN analysis failed.

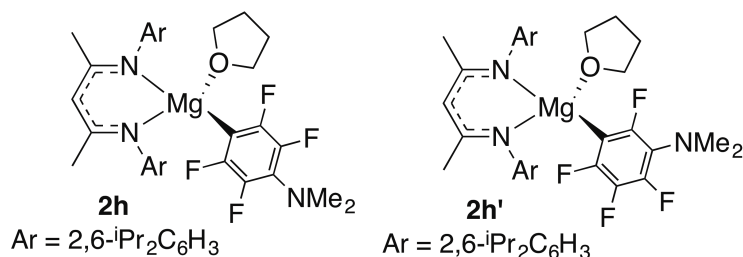

**Compound 2h and 2h'** (3.4:1, 40 mg, 0.06 mmol, 50 %<sup>8</sup>): <sup>1</sup>H NMR (400 MHz, benzene-*d*<sub>6</sub>, 298 K) δ (ppm): 0.83-1.20 (bm, CH(CH<sub>3</sub>)<sub>2</sub> and O(CH<sub>2</sub>)<sub>2</sub>(CH<sub>2</sub>)<sub>2</sub> for **2h** and **2h'**), 1.70 (s, **2h'** CH<sub>3</sub>), 1.72 (s, **2h** CH<sub>3</sub>), 3.20-3.55 (bm, CH(CH<sub>3</sub>)<sub>2</sub> and O(CH<sub>2</sub>)<sub>2</sub>(CH<sub>2</sub>)<sub>2</sub> for **2h** and **2h'**), 4.98 (s, **2h'** CH), 5.01 (s, **2h** CH<sub>3</sub>), 7.05-7.15 (bs, CH for **2h** and **2h'**); <sup>19</sup>F NMR (376.5 MHz, benzene-*d*<sub>6</sub>, 298 K) δ (ppm): -165.2 (m, 1F, **2h'** *m* or *p*- C<sub>6</sub>F<sub>4</sub>NMe<sub>2</sub>), -149.9 (m, 2F, **2h** *m*-C<sub>6</sub>F<sub>4</sub>NMe<sub>2</sub>), -145.2 (m, 1F, **2h'** *m* or *p*- C<sub>6</sub>F<sub>4</sub>NMe<sub>2</sub>), -114.7 (bs, 2F, **2h** *o*-C<sub>6</sub>F<sub>4</sub>NMe<sub>2</sub>), -95.2 (bs, 1F, **2h'** *o*-C<sub>6</sub>F<sub>4</sub>NMe<sub>2</sub>), one <sup>19</sup>F signal not observed; Due to the sensitivity of these complexes repeated attempts to acquire satisfactory CHN analysis failed. Addition of a drop of methanol gave a mixture of *N,N*-dimethylamino-2,3,5,6-tetrafluorobenzene (<sup>19</sup>F NMR (376.5 MHz, benzene-*d*<sub>6</sub>, 298 K) δ (ppm): -151.8 (m, 2H, *o*-C<sub>6</sub>F<sub>4</sub>HNMe<sub>2</sub>), -141.1 (m, 2H, *m*-C<sub>6</sub>F<sub>4</sub>HNMe<sub>2</sub>)) and *N,N*-dimethylamino-2,3,4,6-tetrafluorobenzene (<sup>19</sup>F NMR (376.5 MHz, benzene-*d*<sub>6</sub>, 298 K) δ (ppm): -164.8 (m, 1H), -142.3 (m, 1H), -141.4 (m, 1H), -124.5 (m, 1H)). The minor component was assigned by comparison of the <sup>19</sup>F NMR data against a synthetic sample of *N,N*-dimethylamino-2,3,4,5-tetrafluorobenzene.

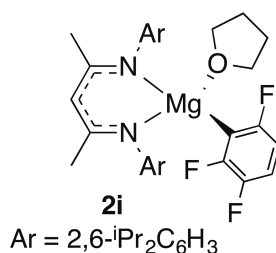

**Compound 2i** (71 mg, 0.11 mmol, 100 %<sup>ix</sup>): <sup>1</sup>H NMR (400 MHz, benzene-*d*<sub>6</sub>, 298 K) δ (ppm): 0.91 (bs, 6H, CH(CH<sub>3</sub>)<sub>2</sub>), 1.06 (bs, 4H, O(CH<sub>2</sub>)<sub>2</sub>(CH<sub>2</sub>)<sub>2</sub>), 1.12-1.29 (bm, 18H, CH(CH<sub>3</sub>)<sub>2</sub>), 1.73 (s, 6H, CH<sub>3</sub>), 3.29 (bm, 6H, CH(CH<sub>3</sub>)<sub>2</sub> and O(CH<sub>2</sub>)<sub>2</sub>(CH<sub>2</sub>)<sub>2</sub>), 3.46 bs, 2H, CH(CH<sub>3</sub>)<sub>2</sub>), 5.02 (s, 1H, CH<sub>3</sub>), 6.49 (m, 1H, CH, C<sub>6</sub>F<sub>3</sub>H<sub>3</sub>), 6.69 (m, 1H, CH, C<sub>6</sub>F<sub>3</sub>H<sub>3</sub>), 7.05-7.15 (bs, 6H, CH); <sup>19</sup>F NMR (376.5 MHz, benzene-*d*<sub>6</sub>, 298 K) δ (ppm): -145.8 – -146.1 (m, 1F, *m*-C<sub>6</sub>F<sub>3</sub>H<sub>2</sub>), -110.1 – -108.9 (bs, 1F, *o*-C<sub>6</sub>F<sub>3</sub>H<sub>2</sub>), -91.0 – -90.0 (bs, 1F, *o*-C<sub>6</sub>F<sub>3</sub>H<sub>2</sub>); <sup>13</sup>C {<sup>1</sup>H} NMR (125 MHz, benzene-*d*<sub>6</sub>, 298 K) δ (ppm): 23.9 (CH<sub>3</sub>), 24.3 (CH<sub>3</sub>), 24.4 (CH<sub>3</sub>), 24.6 (O(CH<sub>2</sub>)<sub>2</sub>(CH<sub>2</sub>)<sub>2</sub>), 27.6 (CH(CH<sub>3</sub>)<sub>2</sub>), 27.9 (CH(CH<sub>3</sub>)<sub>2</sub>), 69.2 (O(CH<sub>2</sub>)<sub>2</sub>(CH<sub>2</sub>)<sub>2</sub>), 95.1 (C(CH<sub>3</sub>)CHC(CH<sub>3</sub>)), 108.8 (dm, CH, C<sub>6</sub>F<sub>3</sub>H<sub>2</sub>, *J* = 38.3), 115.0 (dd, CH, C<sub>6</sub>F<sub>3</sub>H<sub>2</sub>, *J* = 20.6 Hz, *J* = 9.5 Hz), 125.01 (CH), 128.0 (CH), 142.7 (C<sup>IV</sup>), 143.4 (C<sup>IV</sup>), 145.5 (C<sup>IV</sup>), 146.8 (ddd, CF, C<sub>6</sub>F<sub>3</sub>H<sub>2</sub>, *J* = 245.0, *J* = 24.1, *J* = 4.8), 156.1 (ddd, C<sup>IV</sup>, C<sub>6</sub>F<sub>3</sub>H<sub>2</sub>, *J* = 222.5, *J* = 32.8, *J* = 9.1), 165.5 (dd, C<sup>IV</sup>, C<sub>6</sub>F<sub>3</sub>H<sub>2</sub>, *J* = 219.9, *J* = 29.1), 168.9 (C=N), *ipso* C<sup>IV</sup> signal could not be assigned; Due to the sensitivity of these complexes repeated attempts to acquire satisfactory CHN analysis failed.

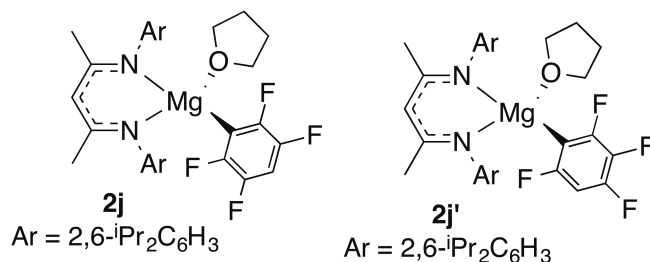

**Compound 2j and 2j'** (1.7:1, 66 mg, 0.1 mmol, 71 %<sup>x</sup>): <sup>1</sup>H NMR (400 MHz, benzene-*d*<sub>6</sub>, 298 K) δ (ppm): 0.78-1.27 (m, **2j** **2j'**, CH(CH<sub>3</sub>)<sub>2</sub> and O(CH<sub>2</sub>)<sub>2</sub>(CH<sub>2</sub>)<sub>2</sub>), 1.71 (s, **2j** and **2j'** CH<sub>3</sub>), 3.14-3.48 (m, **2j**, **2j'** CH(CH<sub>3</sub>)<sub>2</sub> and O(CH<sub>2</sub>)<sub>2</sub>(CH<sub>2</sub>)<sub>2</sub>), 4.99 (s, **2j'** CH), 5.01 (s, **2j** CH), 6.44 (m, **2j'** C<sub>6</sub>F<sub>4</sub>H), 6.62 (m, **2j** C<sub>6</sub>F<sub>4</sub>H), 7.02-7.14 (m, **2j**, **2j'** CH). <sup>19</sup>F NMR (376.5 MHz, benzene-*d*<sub>6</sub>, 298 K) δ (ppm): -169.1 (m, 1F, **2j'**, *m* or *p*-C<sub>6</sub>F<sub>4</sub>H), -141.3 (m, 2F, **2j**, *m*-C<sub>6</sub>F<sub>4</sub>H), -138.2 (m, 1F, **2j'**, *m* or *p*-C<sub>6</sub>F<sub>4</sub>H), -115.1 (, 2F, **2j**, *o*-C<sub>6</sub>F<sub>4</sub>H); -108.1 (bs, 1H, **2j'**, *o*-C<sub>6</sub>F<sub>4</sub>H), -87.6 (bs, 1H, **2j'**, *o*-C<sub>6</sub>F<sub>4</sub>H). Due to the sensitivity of these complexes repeated attempts to acquire satisfactory CHN analysis failed. Addition of a drop of methanol gave a mixture of 1,2,4,5-tetrafluorobenzene, 1,2,3,5-tetrafluorobenzene and 1,2,3,4,5-pentafluorobenzene (from minor C–H activation pathway).

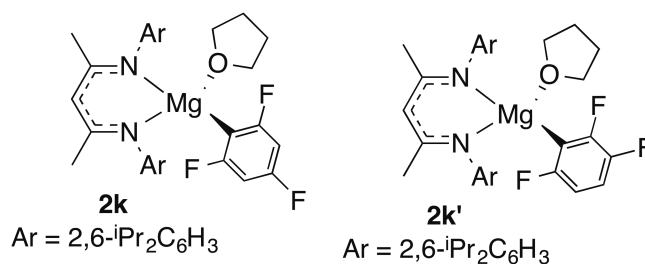

**Preparative scale (2k and 2k')**: *BDIMg*–*MgBDI* (100 mg, 0.11 mmol, approx. 0.03 M) was dissolved in toluene (4 mL) and the 1,2,3,5-tetrafluorobenzene (1.1 mmol, 10 equiv.) was added at 25 °C. After stirring the reaction mixture at this temperature for 7 days, tetrahydrofuran (0.25 mL) was added and the solution was transferred to the freezer. Crystals of [*BDIMg*( $\mu$ -F)(THF)]<sub>2</sub> formed after overnight standing at -35 °C and were isolated by filtration. The solvent was removed from the resultant supernatant under reduced pressure and the crude product extracted into n-hexane (2 mL). Complexes **2k/2k'** could be further purified by crystallization (**2k** and **2k'** 3:1, 64 mg, 0.1 mmol, 76 %<sup>xi</sup>): <sup>1</sup>H NMR (400 MHz, benzene-*d*<sub>6</sub>, 298 K)  $\delta$  (ppm): 0.85-1.28 (bm, **2k**, **2k'** CH(CH<sub>3</sub>)<sub>2</sub> and O(CH<sub>2</sub>)<sub>2</sub>(CH<sub>2</sub>)<sub>2</sub>), 1.68 (s, **2k'** CH<sub>3</sub>), 1.73 (s, **2k** CH<sub>3</sub>), 3.15-3.53 (bm, **2k**, **2k'** CH(CH<sub>3</sub>)<sub>2</sub> and O(CH<sub>2</sub>)<sub>2</sub>(CH<sub>2</sub>)<sub>2</sub>), 4.85 (s, **2k'** CH), 4.99 (s, 1H, **2k** CH), 6.42-6.57 (m, **2k**, **2k'** CH<sup>F</sup>), 7.05-7.16 (bm, CH of **2k**, **2k'**); <sup>19</sup>F NMR (376.5 MHz, benzene-*d*<sub>6</sub>, 298 K)  $\delta$  (ppm): -135.5 (m, 1F, **2k'**, C<sub>6</sub>F<sub>3</sub>H<sub>2</sub>), -119.2 (m, 1F, **2k'**, C<sub>6</sub>F<sub>3</sub>H<sub>2</sub>), -117.0 (m, 1F, **2k'**, C<sub>6</sub>F<sub>3</sub>H<sub>2</sub>), -114.7 (m, 1F, **2k**, *p*-C<sub>6</sub>F<sub>3</sub>H<sub>2</sub>), -81.6 (bs, 2F, **2k**, *o*-C<sub>6</sub>F<sub>3</sub>H<sub>2</sub>); Addition of a drop of methanol gave a mixture of 1,2,3-trifluorobenzene, 1,2,4-trifluorobenzene and 1,2,3,5-tetrafluorobenzene (from minor C–H activation pathway).

[*BDIMg*( $\mu$ -F)(THF)]<sub>2</sub>: <sup>1</sup>H NMR (400 MHz, benzene-*d*<sub>6</sub>, 298 K)  $\delta$  (ppm): 0.97 (d, 12H, CH(CH<sub>3</sub>)<sub>2</sub>, <sup>3</sup>*J*<sub>HH</sub> = 6.8 Hz), 1.10 (d, 12H, CH(CH<sub>3</sub>)<sub>2</sub>, <sup>3</sup>*J*<sub>HH</sub> = 6.8 Hz), 1.50 (bm, 4H, O(CH<sub>2</sub>)<sub>2</sub>(CH<sub>2</sub>)<sub>2</sub>), 1.49 (s, 6H, CH<sub>3</sub>), 3.02 (sept, 4H, CH(CH<sub>3</sub>)<sub>2</sub>, <sup>3</sup>*J*<sub>HH</sub> = 6.8 Hz), 3.54 (bs, 4H, O(CH<sub>2</sub>)<sub>2</sub>(CH<sub>2</sub>)<sub>2</sub>), 4.84 (s, 1H, CH), 6.97-7.12 (m, 6H, CH); <sup>19</sup>F NMR (376.5 MHz, benzene-*d*<sub>6</sub>, 298 K)  $\delta$  (ppm): -187.9.

[*BDIMg*( $\mu$ -F)]<sub>2</sub>: <sup>1</sup>H NMR (400 MHz, benzene-*d*<sub>6</sub>, 298 K)  $\delta$  (ppm): 0.96 (d, 12H, CH(CH<sub>3</sub>)<sub>2</sub>, <sup>3</sup>*J*<sub>HH</sub> = 6.8 Hz), 1.10 (d, 12H, CH(CH<sub>3</sub>)<sub>2</sub>, <sup>3</sup>*J*<sub>HH</sub> = 6.8 Hz), 1.48 (s, 6H, CH<sub>3</sub>), 3.02 (sept, 4H, CH(CH<sub>3</sub>)<sub>2</sub>, <sup>3</sup>*J*<sub>HH</sub> = 6.8 Hz), 4.84 (s, 1H, CH), 6.97-7.12 (m, 6H, CH); <sup>19</sup>F NMR (376.5 MHz, benzene-*d*<sub>6</sub>, 298 K)  $\delta$  (ppm): -187.9.

**NMR scale reaction of *BDIMg*–*MgBDI*.(THF)<sub>2</sub> with C<sub>6</sub>F<sub>6</sub>**: *BDIMg*–*MgBDI* (10 mg, 0.011 mmol) was dissolved in benzene-*d*<sub>6</sub> (0.6 mL) and the solution transferred into a Young's tap NMR tube equipped with a capillary tube containing a ferrocene standard solution; a *t*=0 <sup>1</sup>H NMR spectrum was recorded. To the solution was added a drop of tetrahydrofuran where an immediate colour change from yellow to orange was observed. A further <sup>1</sup>H NMR was recorded, clearly showing the formation of the THF adduct, as evidenced by the upfield shifts in the NMR signals. Hexafluorobenzene (13  $\mu$ L, 0.11 mmol, 10 equiv.) was added using a micropipette. After approximately 45 minutes a <sup>1</sup>H NMR spectrum was recorded, showing full conversion of *BDIMg*–*MgBDI* to *BDIMg*C<sub>6</sub>F<sub>5</sub>.THF and 0.5 [*BDIMg*( $\mu$ -F)(THF)]<sub>2</sub>.

**Figure S1:** Stack plot of the formation of  $BDMg-MgBDI.(THF)_2$  and subsequent reaction with  $C_6F_6$  to form  $BDMgC_6F_5.THF$  (**2a**) and  $0.5 [BDMg(\mu-F)(THF)]_2$  at 25 °C in benzene- $d_6$ .

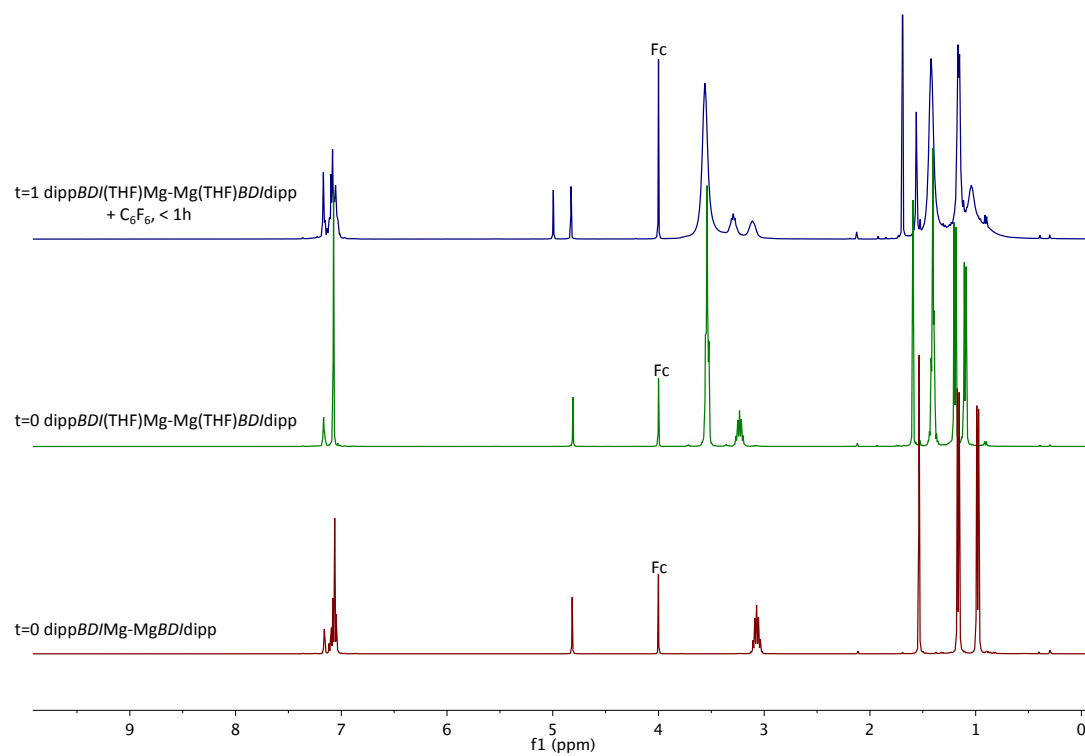

## 2.2 Cross-over experiment to form 4

**Synthesis of 4**  $^{mes}BDIMg-MgBDI^{dipp}$ : To a Young's tap ampoule was added  $^{mes}BDIMg-MgBDI^{dipp}$  (73 mg, 0.1 mmol) and  $^{dipp}BDIMg-MgBDI^{dipp}$  (90 mg, 0.1 mmol) in toluene (5 mL). The ampoule has heated at 353 K and the reaction was monitored by taking NMR aliquots. After 10 days it was necessary to add more  $^{mes}BDIMg-MgBDI^{mes}$  to the reaction ( $^{mes}BDIMg-MgBDI^{mes}$  has lower solution stability and degrades over time). After a total of 2 weeks at 353 K, the solution was filtered to remove a significant amount of black precipitate and the filtrate was reduced *in vacuo*. The yellow crystalline solid was washed with hexane (3 mL) to yield compound **4** in high purity (70 mg, 0.09 mmol, 43 %).  $^1H$  NMR (400 MHz, benzene- $d_6$ , 298 K)  $\delta$  (ppm): 1.01 (d, 12H,  $CH(CH_3)_2$ ,  $^3J_{HH} = 6.8$  Hz), 1.13 (d, 12H,  $CH(CH_3)_2$ ,  $^3J_{HH} = 6.8$  Hz), 1.47 (s, 6H,  $C(CH_3)CHC(CH_3)^{mes}$ ), 1.66 (s, 6H,  $C(CH_3)CHC(CH_3)^{dipp}$ ), 1.91 (s, 12H, *o*- $CH_3^{mes}$ ), 2.30 (s, 6H, *p*- $CH_3^{mes}$ ), 3.02 (sept, 4H,  $CH(CH_3)_2$ ,  $^3J_{HH} = 6.8$  Hz), 4.83 (s, 1H,  $C(CH_3)CHC(CH_3)^{mes}$ ), 4.88 (s, 1H,  $C(CH_3)CHC(CH_3)^{dipp}$ ), 6.77 (s, 4H,  $CH^{mes}$ ), 7.07-7.15 (m, 6H,  $CH^{dipp}$ );  $^{13}C$  { $^1H$ } NMR (100 MHz, benzene- $d_6$ , 298 K)  $\delta$  (ppm): 18.8 (*o*- $CH_3^{mes}$ ), 20.8 (*p*- $CH_3^{mes}$ ), 23.0 ( $C(CH_3)CHC(CH_3)^{mes}$ ), 23.4 ( $CH(CH_3)_2$ ), 23.6 ( $C(CH_3)CHC(CH_3)^{dipp}$ ), 24.4 ( $CH(CH_3)_2$ ), 28.0 ( $CH(CH_3)_2$ ), 95.0 ( $C(CH_3)CHC(CH_3)^{dipp}$ ), 95.7 ( $C(CH_3)CHC(CH_3)^{mes}$ ), 123.3 ( $CH^{dipp}$ ), 124.8 ( $CH^{dipp}$ ), 128.0 ( $CH^{dipp}$ ), 129.3 ( $CH^{mes}$ ), 131.0 ( $C^{IV}$ ), 132.1 ( $C^{IV}$ ), 141.5 ( $C^{IV}$ ), 144.8 ( $C^{IV}$ ), 145.7 ( $C^{IV}$ ), 166.6 ( $C(CH_3)CHC(CH_3)$  dipp or mes), 166.9 ( $C(CH_3)CHC(CH_3)$  dipp or mes); Anal. Calc. ( $Mg_2C_{52}H_{70}N_4$ ): C, 78.09; H, 8.82; N, 7.01. Found: C, 77.94; H, 8.86; N, 7.00.

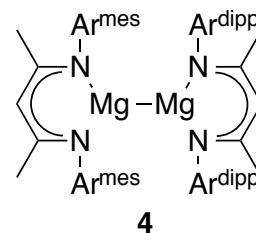

**Figure S2:** Stack plot of the formation of compound **4** from compounds **1** and **3** at 80 °C over time; solvent peak marked with asterisk.

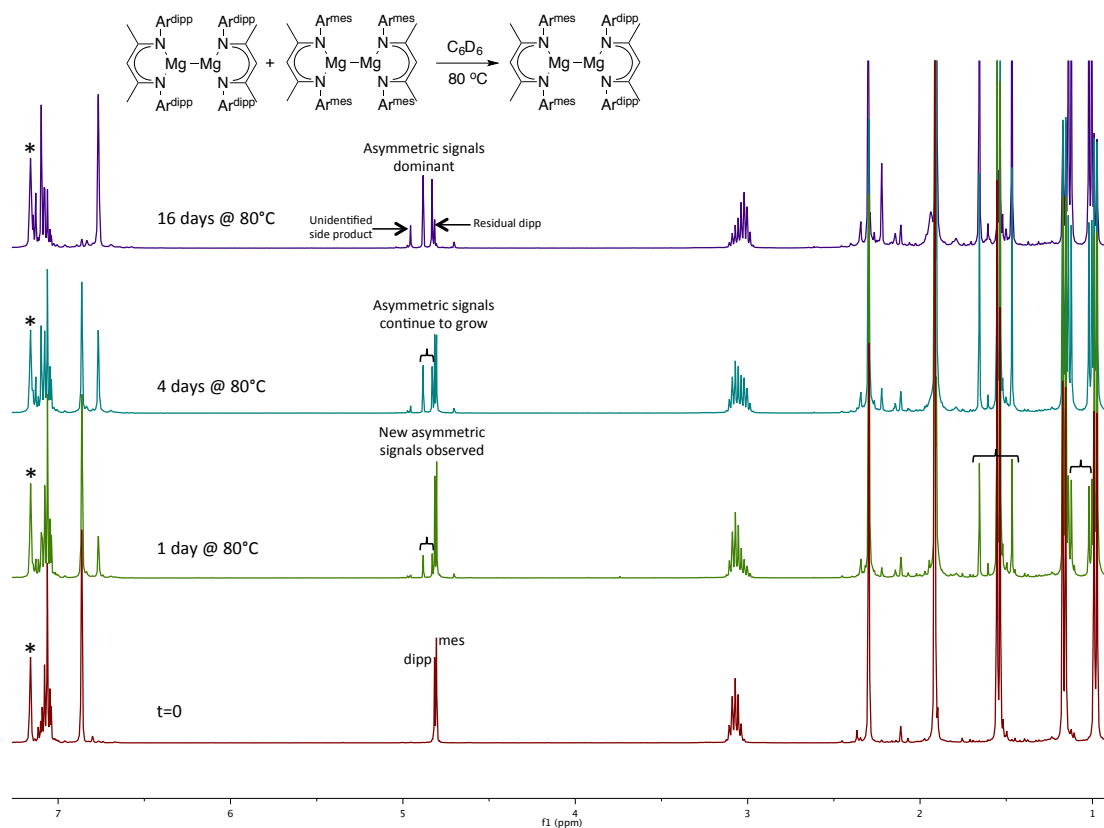



### 3. Variable Temperature $^{19}\text{F}$ NMR data

Variable temperature  $^{19}\text{F}$  NMR data was collected on both isolated and purified samples of **2a** along with the reaction mixture obtained from the addition of hexafluorobenzene to **1**. The data are presented below. **2a** shows a decoalescence of the *ortho*- and *meta*-fluorine resonances upon cooling suggesting hindered rotation about the Mg–C bond. This process has been quantified. A minor species is also observed at low temperature and may be due to an as yet unidentified ligand redistribution / Schlenk equilibrium process.

**Figure S3:** Variable temperature  $^{19}\text{F}$  NMR spectra of compound **2a** over the temperature range 193 – 323 K.

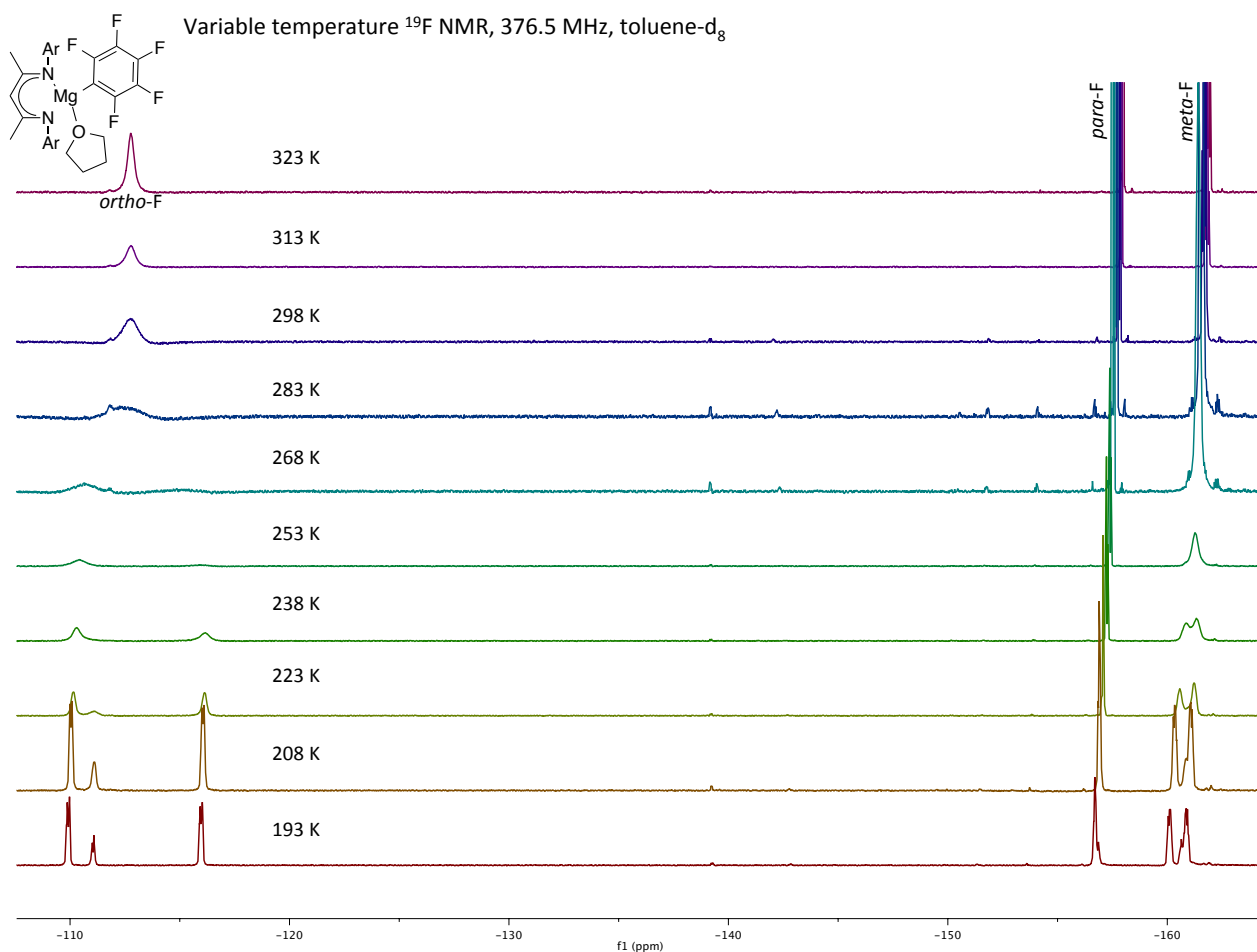

VT NMR data was fitted using line shape analysis with the DNMR programme integrated into Toppsin v3.1. The  $^{19}\text{F}$  resonances of **2a** were fitted over the 223 to 333 K range with an initial line broadening factor of 2 Hz. Fits for  $k$  were optimized to the experimental data with reasonable accuracy and the modelled data are presented below, a minor unassigned species observable at the lowest temperatures was not included in the model. The activation parameters for the exchange process are as follows:  $\Delta H^\ddagger = 7.6 \text{ kcal mol}^{-1}$ ,  $\Delta S^\ddagger = -15.0 \text{ cal K}^{-1} \text{ mol}^{-1}$ ,  $\Delta G^\ddagger_{298\text{K}} = 12.1 \text{ kcal mol}^{-1}$ .

**Figure S4.** Modelled  $^{19}\text{F}$  resonances of **2a** from 223 to 323K.

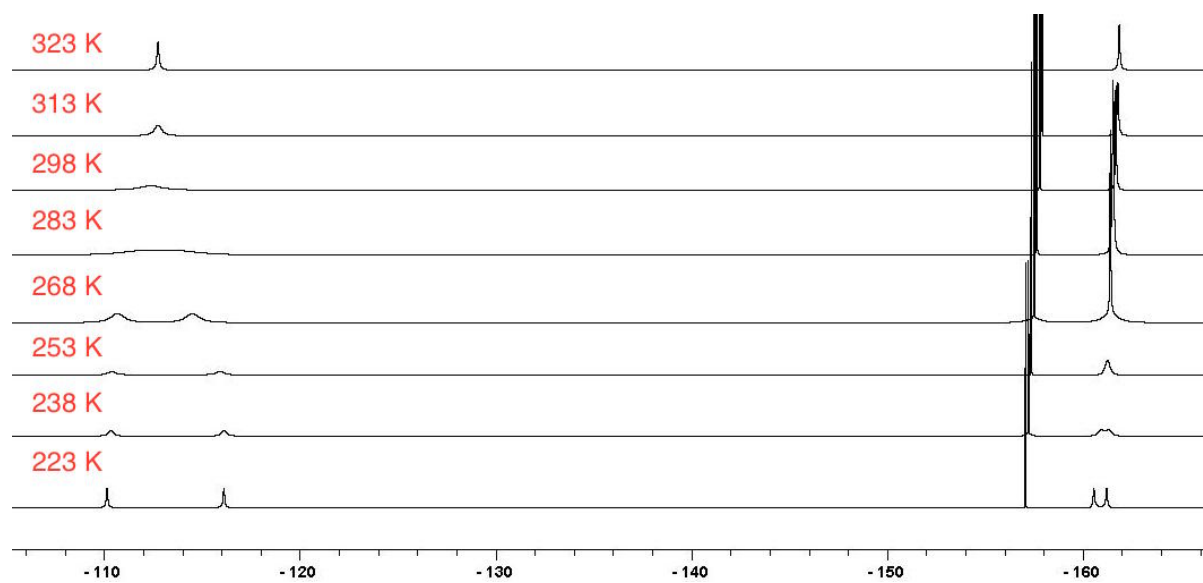

**Figure S5.** Eyring analysis:  $\ln(k/T)$  versus  $1/T$ .

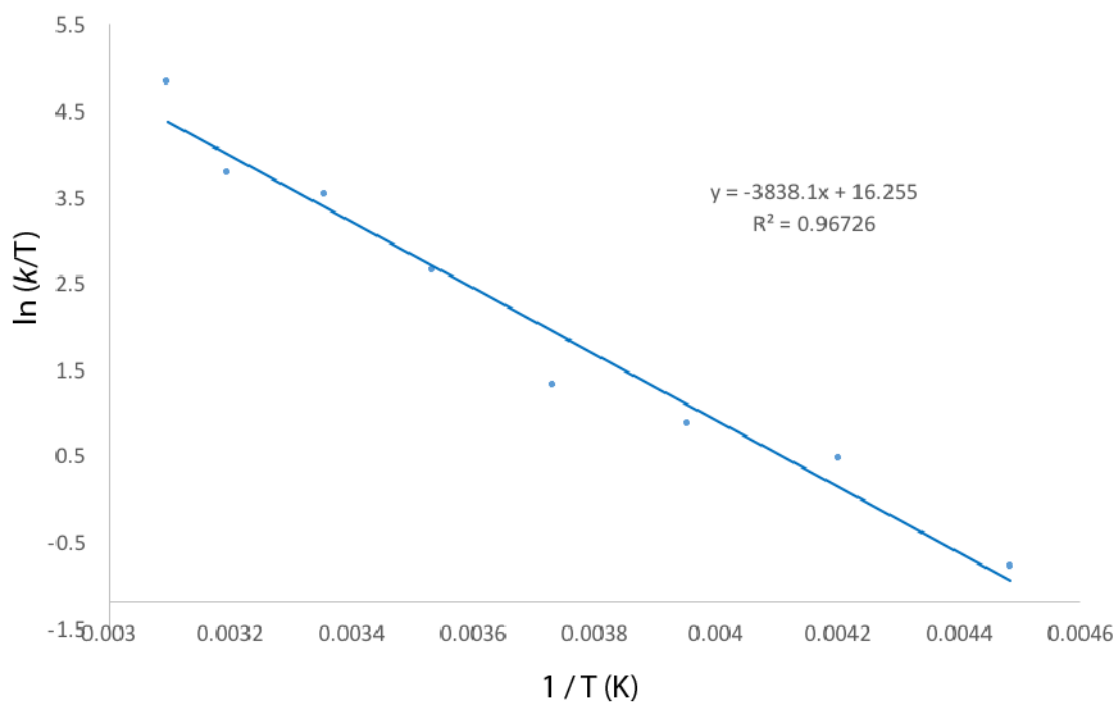

The reaction mixture from the addition of **1** to hexafluorobenzene also shows a decoalescence of the *ortho*- and *meta*-fluorine resonances upon cooling suggesting hindered rotation about the Mg–C bond. In addition to  $[BDIMg(\mu-F)]_2$ , observable at room temperature, two new magnesium fluoride resonances become clear at low temperatures. While we have been unable to resolve this complex processes addition of a drop of THF yields a mixture of **2a** and  $[BDIMg(\mu-F)(THF)]$ .

**Figure S6:** Variable temperature  $^{19}F$  NMR spectra of the products from the reaction of compound **1** with hexafluorobenzene over the temperature range 193 – 333 K.

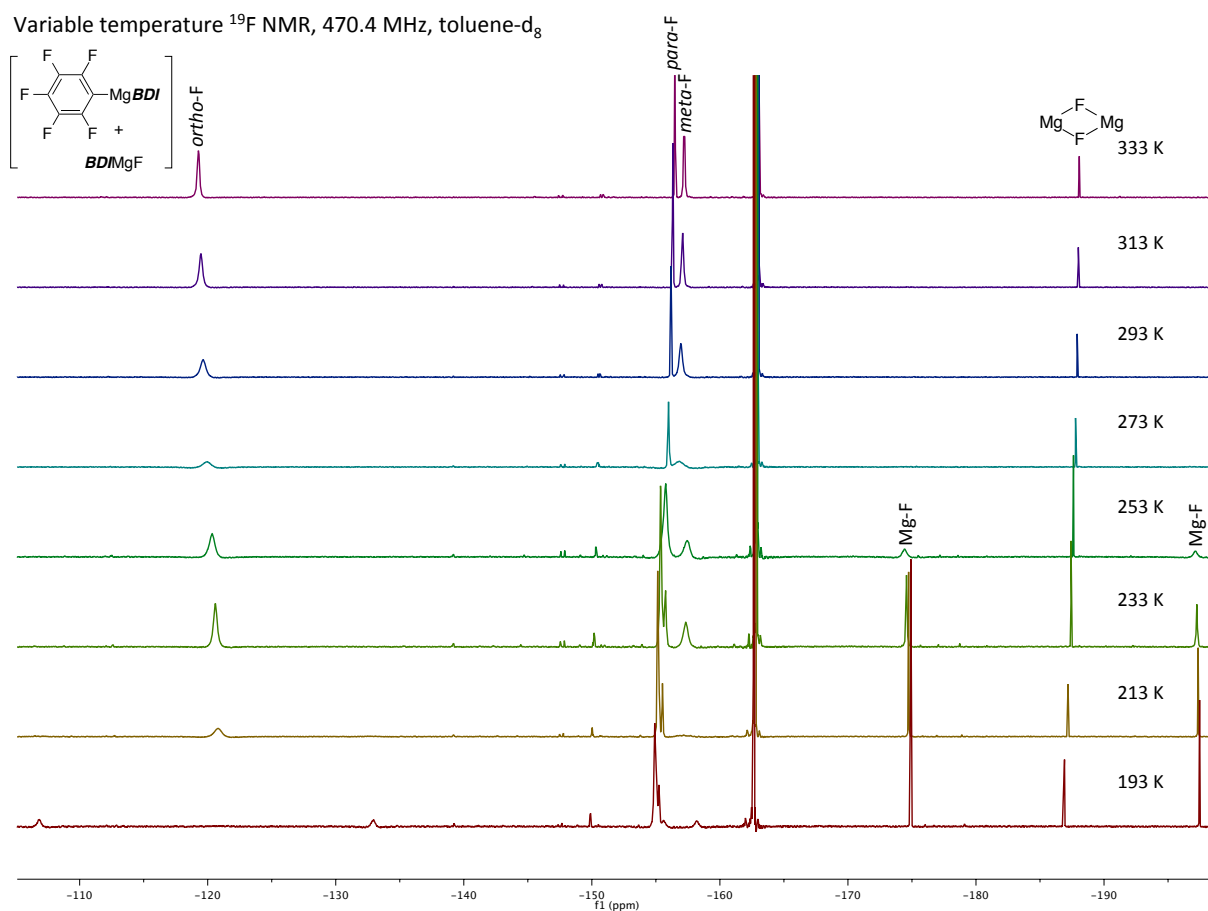

#### 4. X-ray Crystallographic Data

##### The X-ray crystal structure of <sup>mes</sup>BDIMg–MgBDI<sup>mes</sup>

This structure is the same as that reported by Bonyhady *et al.*<sup>iii</sup> in 2010 (CCDC refcode GUPQUE). The complex was found to have crystallographic  $C_2$  symmetry about an axis that bisects the Mg1...Mg1A vector.

##### The X-ray crystal structure of **2a**

The crystal of **2a** that was studied was found to be a three component twin in a *ca.* 44:12:44 ratio – despite the comparatively low contribution of component two, ignoring this component and modelling the data as a two component twin using components 1 and 3 gave poor results. The lattice for component 2 is related to that of component 1 by the approximate twin law  $[-0.21\ 0.80\ -0.12\ -1.20\ -0.18\ -0.12\ -0.37\ 0.04\ 0.96]$ , whilst that for component 3 is related to that of component 1 by the approximate twin law  $[1.00\ -0.04\ -0.01\ 0.00\ -1.00\ 0.00\ 0.00\ 0.00\ 1.00]$ . Despite a *ca.* 47 hour data collection, the data collected for the crystal of **2a** was weak (overall  $I/\sigma$  *ca.* 3.1), and the presence of three differently orientated lattices in the crystal was clearly a contributing factor in this weak scattering.

The structure was found to contain two crystallographically independent complexes, **2a-A** and **2a-B**. The THF ligand in complex **2a-A** was found to be disordered, with two orientations of *ca.* 77 and 23% occupancy identified for the middle two carbon atoms of the  $C_4$  chain [C42A and C43A]. The geometries of both orientations were optimised, the thermal parameters of adjacent atoms were restrained to be similar, and only the non-hydrogen atoms of the major occupancy orientation were refined anisotropically (those of the minor occupancy orientation were refined isotropically).

##### The X-ray crystal structure of **2b**

The C36-based  $CF_3$  unit in the structure of **2b** was found to be disordered. Two orientations were identified of *ca.* 80 and 20% occupancy, their geometries were optimised, the thermal parameters of adjacent atoms were restrained to be similar, and only the atoms of the major occupancy orientation were refined anisotropically (those of the minor occupancy orientation were refined isotropically).

##### The X-ray crystal structure of **2d**

Close inspection of the diffraction data for the crystal of **2d** that was studied showed a small (*ca.* 13%) but not insignificant twin component. Attempts to model this twinning, however, did not improve upon the results obtained without considering the twinning, and so no twin models were used in the final refinements. This unresolved twinning may, however, be the root cause of some anomalous intensities.

### The X-ray crystal structure of **4**

The crystal of **4** that was studied was found to be a two component twin in a *ca.* 81:19 ratio, with the two lattices related by the approximate twin law  $[-1.00\ 0.00\ -0.62\ 0.00\ -1.00\ 0.00\ 0.00\ 0.00\ 1.00]$ . The complex was found to have crystallographic  $C_2$  symmetry about an axis that passes through C2, Mg1, Mg2 and C22.

### The X-ray crystal structure of $[BDIMg(\mu-F)(THF)]_2$

The complex in the structure of  $[BDIMg(\mu-F)(THF)]_2$  was found to have crystallographic  $C_{2h}$  symmetry; the  $C_2$  axis passes through the two bridging fluorine atoms F1 and F1A, whilst the mirror plane is perpendicular to this and passes through the metal centres Mg1 and Mg1A. The unique O20-based THF ligand was found to be disordered across the mirror plane, and this disorder was modelled by using one complete 50% occupancy orientation for the THF ligand (the operation of the mirror plane generates a second 50% occupancy orientation). The geometry of this unique orientation was optimised, and the non-hydrogen atoms were refined anisotropically. The C31-based included hexane solvent molecule has crystallographic  $C_{2h}$  symmetry.

This structure is isomorphous to the  $(\mu-H)_2$  analogue reported by Green *et al.*<sup>xiii</sup> in 2008 (CCDC refcode XOLXEC), though that reports the unit cell using the *C*-face setting whereas the body-centred, *I*, setting is reported here. The  $(\mu-F)_2$  complex itself was reported in 2002 as a different solvate (and in a different unit cell) by Hao *et al.*<sup>xiii</sup> (CCDC refcode QADPOB).

**Figure S7:** The crystal structure of the  $C_2$ -symmetric complex  $^{mes}BDIMg-MgBDI^{mes}$  (50% probability ellipsoids).

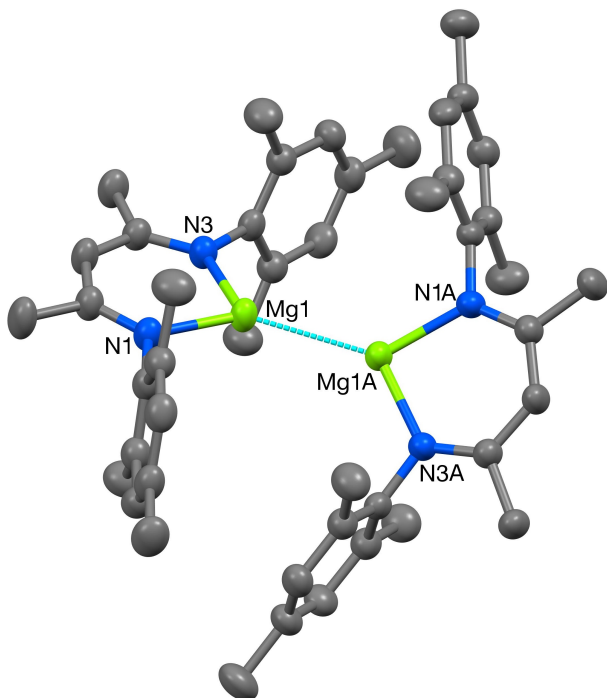

**Figure S8:** The structure one (**2a-A**) of the two independent complexes present in the crystal of **2a** (50% probability ellipsoids).

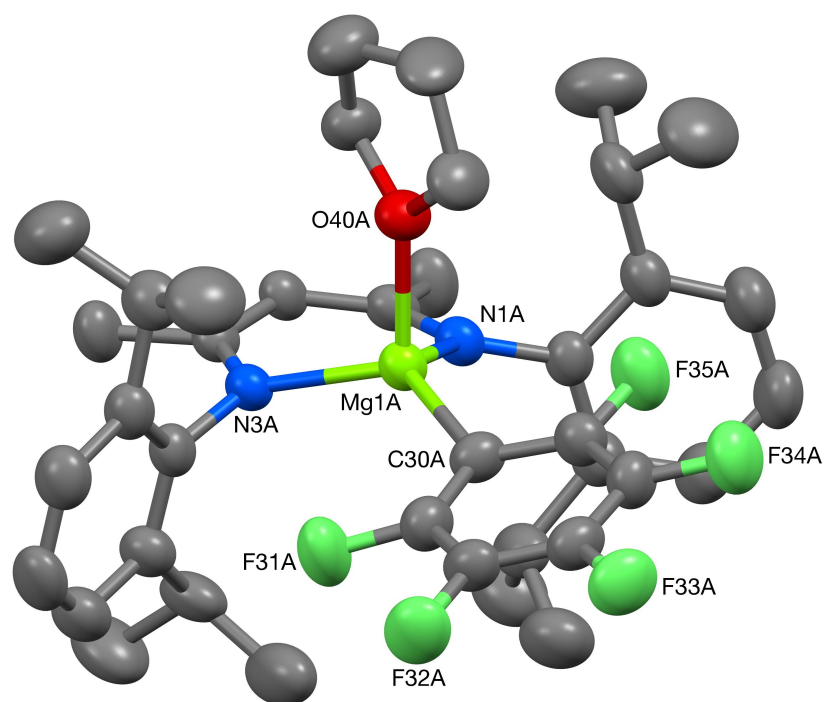

**Figure S9:** The structure one (**2a-B**) of the two independent complexes present in the crystal of **2a** (50% probability ellipsoids).

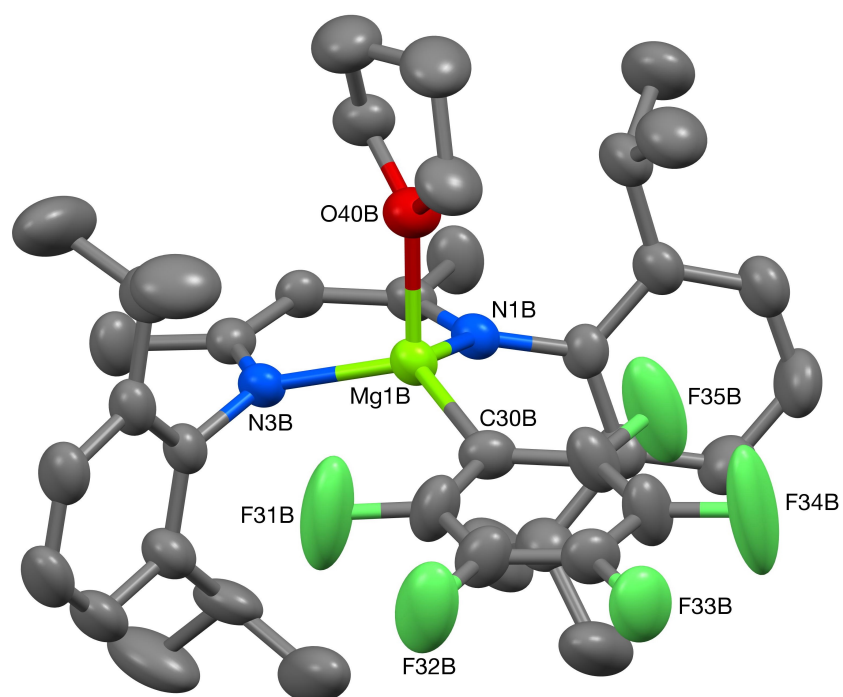

**Figure S10:** The crystal structure of **2b** (50% probability ellipsoids).

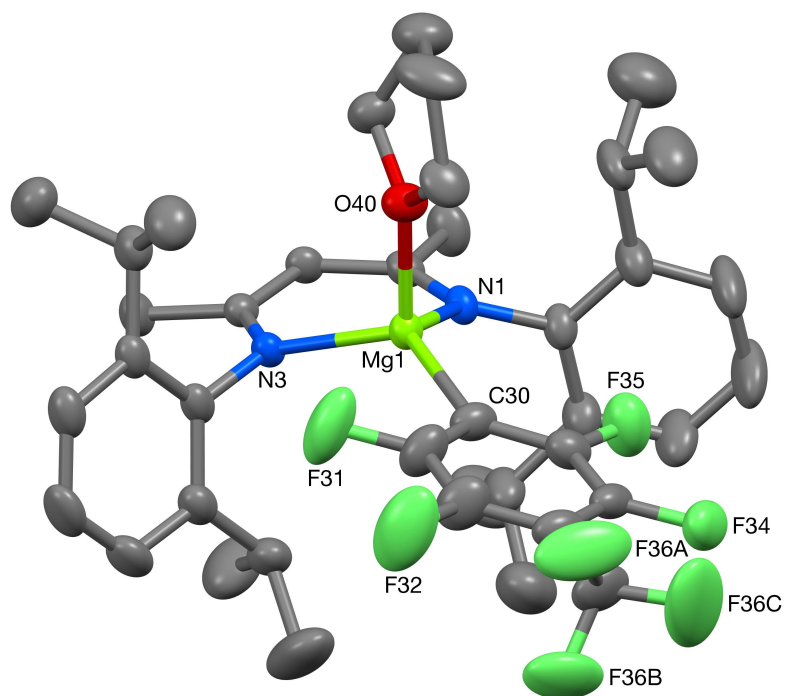

**Figure S11:** The crystal structure of **2c** (50% probability ellipsoids).

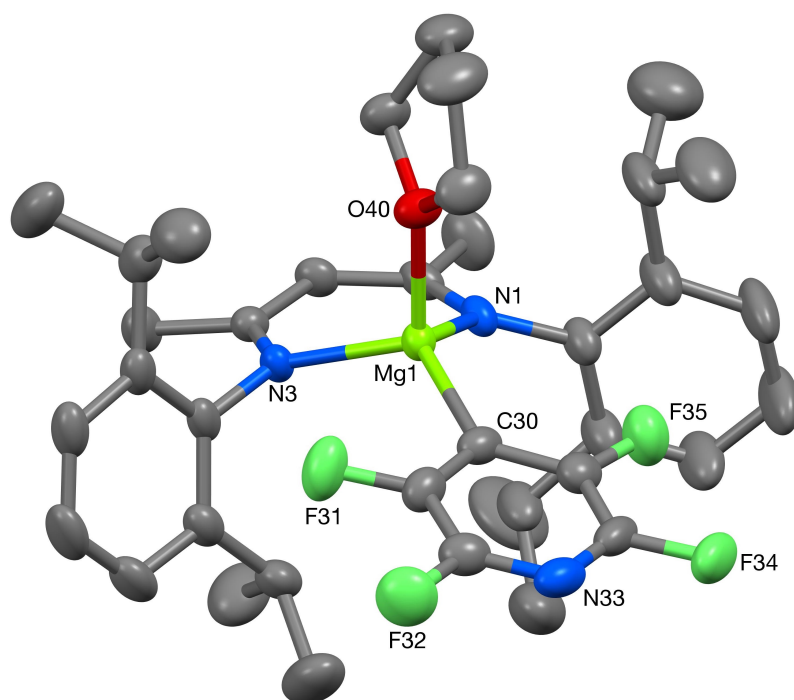

**Figure S12:** The crystal structure of **2d** (50% probability ellipsoids).

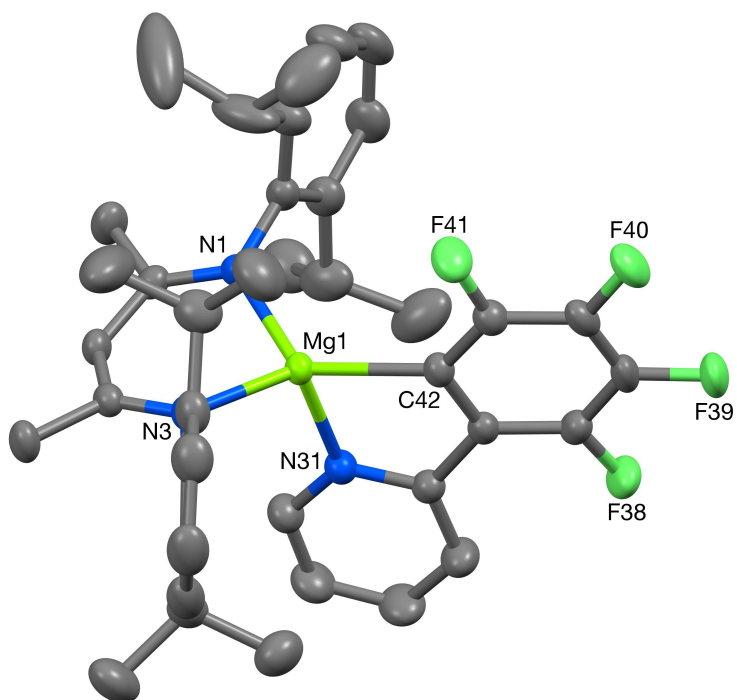

**Figure S13:** The crystal structure of the  $C_2$ -symmetric complex **4** (50% probability ellipsoids).

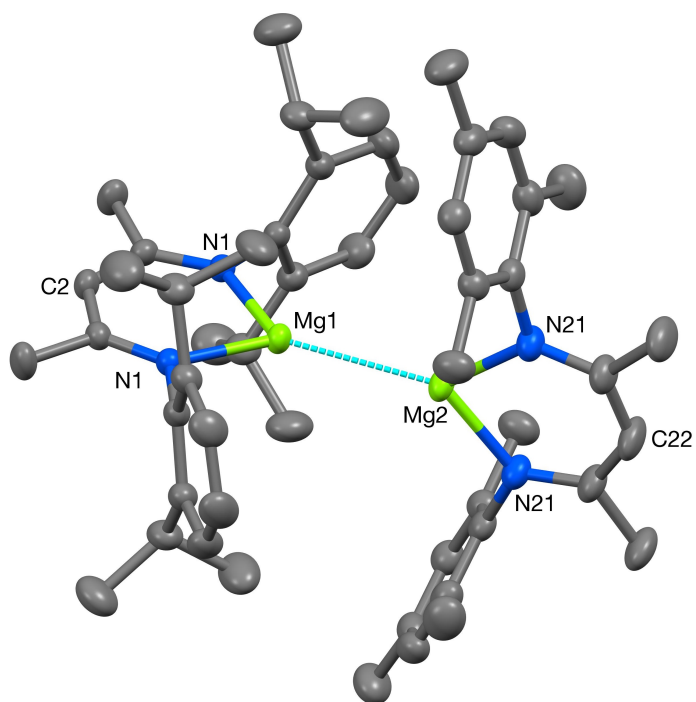



**Figure S14:** The crystal structure of the  $C_{2h}$ -symmetric complex  $[BDIMg(\mu-F)(THF)]_2$  (50% probability ellipsoids).

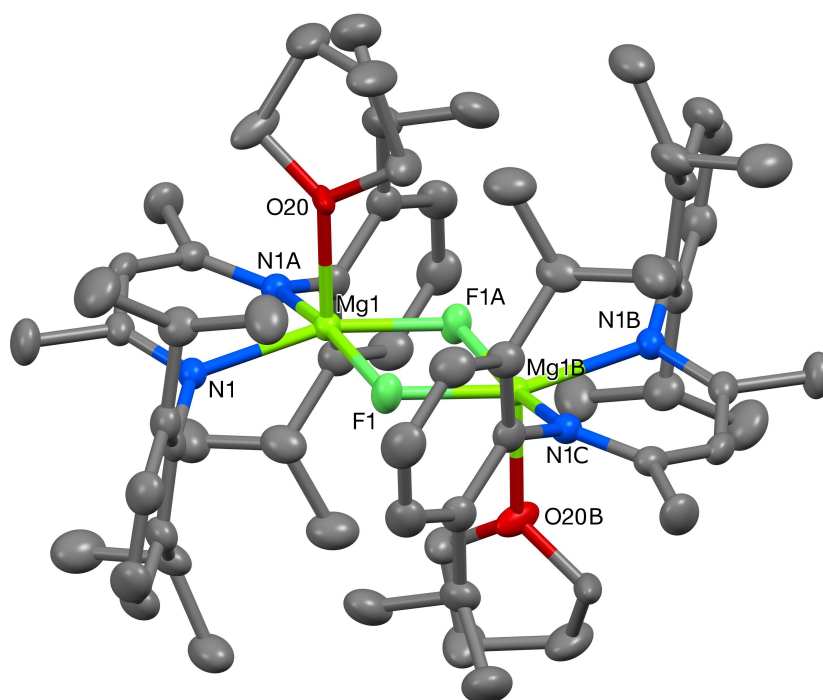

**Table S2.** Crystal Data, Data Collection and Refinement Parameters for the structures of  $^{mes}BDIMg-MgBDI^{mes}$ , **2a**, **2b**, **2c**, **2d**, **4** and  $[BDIMg(\mu-F)(THF)]$ .

| data                                                 | $^{mes}BDIMg-MgBDI^{mes}$ | <b>2a</b>               | <b>2b</b>               | <b>2c</b>               |
|------------------------------------------------------|---------------------------|-------------------------|-------------------------|-------------------------|
| <b>formula</b>                                       | $C_{46}H_{58}Mg_2N_4$     | $C_{39}H_{49}F_5MgN_2O$ | $C_{40}H_{49}F_7MgN_2O$ | $C_{38}H_{49}F_4MgN_3O$ |
| <b>solvent</b>                                       | —                         | —                       | —                       | —                       |
| <b>formula weight</b>                                | 715.58                    | 681.11                  | 731.12                  | 664.11                  |
| <b>colour, habit</b>                                 | pale yellow blocks        | colourless plates       | colourless blocks       | pale brown blocks       |
| <b>temperature / K</b>                               | 173(2)                    | 173(2)                  | 173(2)                  | 173(2)                  |
| <b>crystal system</b>                                | monoclinic                | triclinic               | monoclinic              | monoclinic              |
| <b>space group</b>                                   | $P2/n$ (no. 13)           | $P-1$ (no. 2)           | $I2/a$ (no. 15)         | $C2/c$ (no. 15)         |
| <b>a / Å</b>                                         | 13.4857(6)                | 12.8601(11)             | 14.9886(4)              | 34.4121(8)              |
| <b>b / Å</b>                                         | 8.2720(4)                 | 15.9403(14)             | 14.8728(4)              | 14.8141(3)              |
| <b>c / Å</b>                                         | 19.9081(8)                | 18.1538(13)             | 36.1312(9)              | 14.8714(4)              |
| <b>α / deg</b>                                       | 90                        | 84.244(7)               | 90                      | 90                      |
| <b>β / deg</b>                                       | 101.058(4)                | 89.380(6)               | 98.802(3)               | 100.005(2)              |
| <b>γ / deg</b>                                       | 90                        | 88.675(7)               | 90                      | 90                      |
| <b>V / Å<sup>3</sup></b>                             | 2179.59(16)               | 3701.6(5)               | 7959.6(3)               | 7465.9(3)               |
| <b>Z</b>                                             | 2 [b]                     | 4 [c]                   | 8                       | 8                       |
| <b>D<sub>c</sub> / g cm<sup>-3</sup></b>             | 1.090                     | 1.222                   | 1.220                   | 1.182                   |
| <b>radiation used</b>                                | Cu-Kα                     | Cu-Kα                   | Mo-Kα                   | Mo-Kα                   |
| <b>μ / mm<sup>-1</sup></b>                           | 0.742                     | 0.896                   | 0.109                   | 0.100                   |
| <b>2θ max / deg</b>                                  | 148                       | 150                     | 56                      | 57                      |
| <b>no. of unique reflns</b>                          |                           |                         |                         |                         |
| <b>measured (R<sub>int</sub>)</b>                    | 4199 (0.0411)             | 33969 (0.0922)          | 8344 (0.0233)           | 7786 (0.0228)           |
| <b>obs,  F<sub>o</sub>  &gt; 4σ( F<sub>o</sub> )</b> | 2876                      | 11317                   | 6112                    | 5779                    |

|                                                                        |                |                |                |                |
|------------------------------------------------------------------------|----------------|----------------|----------------|----------------|
| <b>no. of variables</b>                                                | 243            | 896            | 487            | 434            |
| <b><math>R_1(\text{obs})</math>, <math>wR_2(\text{all})</math> [a]</b> | 0.0502, 0.1472 | 0.0715, 0.2208 | 0.0555, 0.1456 | 0.0485, 0.1317 |

Table S2. continued...

| <b>data</b>                                                            | <b>2d</b>                                                       | <b>4</b>                                                       | <b>[BDIMg(<math>\mu</math>-F)(THF)]<sub>2</sub></b>                                          |
|------------------------------------------------------------------------|-----------------------------------------------------------------|----------------------------------------------------------------|----------------------------------------------------------------------------------------------|
| <b>formula</b>                                                         | C <sub>40</sub> H <sub>45</sub> F <sub>4</sub> MgN <sub>3</sub> | C <sub>52</sub> H <sub>70</sub> Mg <sub>2</sub> N <sub>4</sub> | C <sub>66</sub> H <sub>98</sub> F <sub>2</sub> Mg <sub>2</sub> N <sub>4</sub> O <sub>2</sub> |
| <b>solvent</b>                                                         | —                                                               | —                                                              | C <sub>6</sub> H <sub>14</sub>                                                               |
| <b>formula weight</b>                                                  | 668.10                                                          | 799.74                                                         | 1152.27                                                                                      |
| <b>colour, habit</b>                                                   | colourless<br>blocks                                            | yellow blocky<br>needles                                       | colourless blocks                                                                            |
| <b>temperature / K</b>                                                 | 173(2)                                                          | 173(2)                                                         | 173(2)                                                                                       |
| <b>crystal system</b>                                                  | monoclinic                                                      | monoclinic                                                     | monoclinic                                                                                   |
| <b>space group</b>                                                     | <i>C2/c</i> (no. 15)                                            | <i>C2/c</i> (no. 15)                                           | <i>I2/m</i> (no. 12)                                                                         |
| <b><i>a</i> / Å</b>                                                    | 31.6147(4)                                                      | 18.2530(6)                                                     | 11.9516(5)                                                                                   |
| <b><i>b</i> / Å</b>                                                    | 16.0108(2)                                                      | 13.8247(3)                                                     | 18.2934(7)                                                                                   |
| <b><i>c</i> / Å</b>                                                    | 15.04066(19)                                                    | 21.1714(6)                                                     | 15.7645(6)                                                                                   |
| <b><math>\alpha</math> / deg</b>                                       | 90                                                              | 90                                                             | 90                                                                                           |
| <b><math>\beta</math> / deg</b>                                        | 101.3341(12)                                                    | 110.993(3)                                                     | 99.934(4)                                                                                    |
| <b><math>\gamma</math> / deg</b>                                       | 90                                                              | 90                                                             | 90                                                                                           |
| <b><i>V</i> / Å<sup>3</sup></b>                                        | 7464.77(17)                                                     | 4987.8(3)                                                      | 3395.0(2)                                                                                    |
| <b><i>Z</i></b>                                                        | 8                                                               | 4 [b]                                                          | 2 [d]                                                                                        |
| <b><i>D<sub>c</sub></i> / g cm<sup>-3</sup></b>                        | 1.189                                                           | 1.065                                                          | 1.127                                                                                        |
| <b>radiation used</b>                                                  | Cu-K $\alpha$                                                   | Cu-K $\alpha$                                                  | Mo-K $\alpha$                                                                                |
| <b><math>\mu</math> / mm<sup>-1</sup></b>                              | 0.830                                                           | 0.692                                                          | 0.087                                                                                        |
| <b>2<math>\theta</math> max / deg</b>                                  | 148                                                             | 147                                                            | 56                                                                                           |
| <b>no. of unique reflns</b>                                            |                                                                 |                                                                |                                                                                              |
| <b>measured (<math>R_{\text{int}}</math>)</b>                          | 7157 (0.0193)                                                   | 8912 (0.0505)                                                  | 3484 (0.0189)                                                                                |
| <b>obs, <math> F_o  &gt; 4\sigma( F_o )</math></b>                     | 6030                                                            | 7263                                                           | 2678                                                                                         |
| <b>no. of variables</b>                                                | 443                                                             | 274                                                            | 221                                                                                          |
| <b><math>R_1(\text{obs})</math>, <math>wR_2(\text{all})</math> [a]</b> | 0.0387, 0.1083                                                  | 0.0458, 0.1363                                                 | 0.0467, 0.1171                                                                               |

[a]  $R_1 = \Sigma||F_o| - |F_c||/\Sigma|F_o|$ ;  $wR_2 = \{\Sigma[w(F_o^2 - F_c^2)^2] / \Sigma[w(F_o^2)^2]\}^{1/2}$ ;  $w^{-1} = \sigma^2(F_o^2) + (aP)^2 + bP$ . [b] The molecule has crystallographic *C*<sub>2</sub> symmetry. [c] There are two crystallographically independent complexes. [d] The molecule has crystallographic *C*<sub>2h</sub> symmetry.

Table S2 provides a summary of the crystallographic data for the structures of **1**, **2a**, **2b**, **2c**, **2d**, **4** and [BDIMg( $\mu$ -F)(THF)]<sub>2</sub>. Data were collected using Agilent Diffraction Xcalibur PX Ultra A (**1**, **2a**, **2d** and **4**) and Xcalibur 3 E (**2b**, **2c** and [BDIMg( $\mu$ -F)(THF)]<sub>2</sub>) diffractometers, and the structures were refined using the SHELXTL, SHELX-97, and SHELX-2013 program systems.<sup>xiv</sup> CCDC 1497405 to 1497411.

## 5. DFT Calculations

Calculations were conducted in Gaussian09. Unless indicated otherwise, all minima were confirmed by frequency calculations and solid-state data were used as an input for the atom coordinates. A series of functionals and basis-sets were tested, benchmarking the data against solid-state data on **2b**, **2d** along with the known structures of  $[BDIMg(\mu-F)(THF)]_2$  and  $[BDIMg-MgBDI]$ . The results of these experiments are presented in section 4.1, the  $\omega B97X$  functional and a hybrid 6,31G+(d,p) (C,H,N,O,F) / LanL2DZ (Mg) basis-set gave the best results in terms of computational cost and accurate modelling of key bond angles and distances about the Mg centre.

### 5.1 Benchmarking Studies

**Table S3.** Calculated bond angles ( $^\circ$ ) and bond lengths ( $\text{\AA}$ ) in **2b**.

| <i>Functional</i> | <b>B3LYP</b>                                     | <b>B3LYP</b>                                  | $\omega$ <b>B97X</b>                          | $\omega$ <b>B97XD</b>                         | <b>Xray</b> |
|-------------------|--------------------------------------------------|-----------------------------------------------|-----------------------------------------------|-----------------------------------------------|-------------|
| <i>Basis-set</i>  | 6,31G(d,p)<br>(C,H,N,O,F)<br>6,311G(d,p)<br>(Mg) | 6,31G+(d,p)<br>(C,H,N,O,F)<br>LanL2DZ<br>(Mg) | 6,31G+(d,p)<br>(C,H,N,O,F)<br>LanL2DZ<br>(Mg) | 6,31G+(d,p)<br>(C,H,N,O,F)<br>LanL2DZ<br>(Mg) |             |
| <b>Mg–C</b>       | 2.17                                             | 2.18                                          | <b>2.16</b>                                   | 2.15                                          | 2.176(2)    |
| <b>Mg---F35</b>   | 3.25                                             | 3.31                                          | <b>3.24</b>                                   | 3.25                                          | 3.2         |
| <b>Mg---F31</b>   | 3.34                                             | 3.33                                          | <b>3.35</b>                                   | 3.30                                          | 3.4         |
| <b>Mg–N1</b>      | 2.09                                             | 2.07                                          | <b>2.04</b>                                   | 2.03                                          | 2.0512(16)  |
| <b>Mg–N3</b>      | 2.08                                             | 2.07                                          | <b>2.05</b>                                   | 2.04                                          | 2.0524(16)  |
| <b>Mg–O</b>       | 2.12                                             | 2.06                                          | <b>2.01</b>                                   | 2.01                                          | 2.0318(15)  |
| <b>N–Mg–N</b>     | 95.0                                             | 95.2                                          | <b>93.5</b>                                   | 93.1                                          | 93.99(6)    |

**Table S4.** Calculated bond angles ( $^\circ$ ) and bond lengths ( $\text{\AA}$ ) in **2d**.

| <i>Functional</i> | <b>B3LYP</b>                                     | <b>B3LYP</b>                                  | $\omega$ <b>B97X</b>                          | $\omega$ <b>B97XD</b>                         | <b>Xray</b> |
|-------------------|--------------------------------------------------|-----------------------------------------------|-----------------------------------------------|-----------------------------------------------|-------------|
| <i>Basis-set</i>  | 6,31G(d,p)<br>(C,H,N,O,F)<br>6,311G(d,p)<br>(Mg) | 6,31G+(d,p)<br>(C,H,N,O,F)<br>LanL2DZ<br>(Mg) | 6,31G+(d,p)<br>(C,H,N,O,F)<br>LanL2DZ<br>(Mg) | 6,31G+(d,p)<br>(C,H,N,O,F)<br>LanL2DZ<br>(Mg) |             |
| <b>Mg–N1</b>      | 2.08                                             | 2.06                                          | <b>2.04</b>                                   | 2.02                                          | 2.0402(13)  |
| <b>Mg–N3</b>      | 2.08                                             | 2.06                                          | <b>2.04</b>                                   | 2.02                                          | 2.0467(13)  |
| <b>Mg–N31</b>     | 2.20                                             | 2.17                                          | <b>2.16</b>                                   | 2.13                                          | 2.1293(13)  |
| <b>N–Mg–N</b>     | 95.3                                             | 95.7                                          | <b>94.3</b>                                   | 93.6                                          | 94.89(5)    |

**Table S5.** Calculated bond angles ( $^{\circ}$ ) and bond lengths ( $\text{\AA}$ ) in  $[\text{LMg}(\mu\text{-F})(\text{THF})]_2$ .

| Functional | B3LYP                                            | B3LYP                                         | $\omega$ B97X                                 | $\omega$ B97XD                                | Xray                     |
|------------|--------------------------------------------------|-----------------------------------------------|-----------------------------------------------|-----------------------------------------------|--------------------------|
| Basis-set  | 6,31G(d,p)<br>(C,H,N,O,F)<br>6,311G(d,p)<br>(Mg) | 6,31G+(d,p)<br>(C,H,N,O,F)<br>LanL2DZ<br>(Mg) | 6,31G+(d,p)<br>(C,H,N,O,F)<br>LanL2DZ<br>(Mg) | 6,31G+(d,p)<br>(C,H,N,O,F)<br>LanL2DZ<br>(Mg) |                          |
| Mg-F1      | 1.99                                             | 2.00                                          | <b>1.99</b>                                   | 1.99                                          | 1.9529(10)<br>1.9529(10) |
| Mg-F1A     | 1.98                                             | 2.00                                          | <b>1.97</b>                                   | 1.97                                          |                          |
| Mg-N1      | 2.19                                             | 2.17                                          | <b>2.13</b>                                   | 2.13                                          | 2.1372(14)               |
| Mg-N10     | 2.19                                             | 2.18                                          | <b>2.13</b>                                   | 2.13                                          | 2.1372(14)               |
| N-Mg-N     | 88                                               | 88                                            | <b>88</b>                                     | 88                                            | 87.19(7)                 |

## 5.2 NBO Calculations

NBO calculations were run using NBO v5.9 within g09.  $\omega$ B97X functional and a hybrid 6,31G+(d,p) (C,H,N,O,F) / LanL2DZ (Mg) basis-set.

**Figure S15:** Calculated bond angles ( $^{\circ}$ ) and bond lengths ( $\text{\AA}$ ) in **2a**, **2b** and **2d** (left to right) along with NBO data (NPA charges in bold and blue).

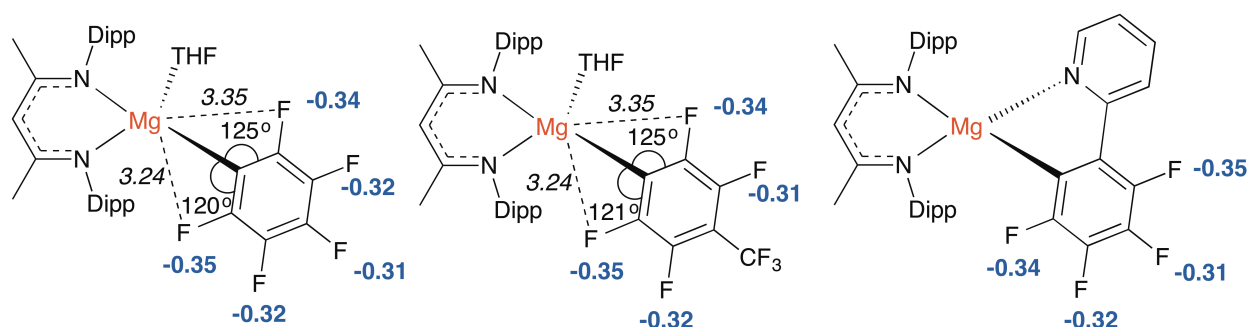

## 5.3 Thermodynamics and Solvation: C-F Bond Cleavage Reaction

Based on the benchmarking, basis sets using an effective core potential on Mg were used in place of more costly approaches. Structures were optimised from X-ray coordinates where available separately using the  $\omega$ B97X functional with and without a dispersion correction. All minima for both dispersion corrected and uncorrected data sets were confirmed by frequency calculations.

**Figure S16:** Graphical representations of **1** (a) 2.98 Å structure, (b) 2.85 Å structure Data quoted are for coordinates generated with  $\omega$ B97XD functional and a hybrid 6,31G+(d,p) (C,H,N,O,F) / Lanl2DZ (Mg) basis-set.

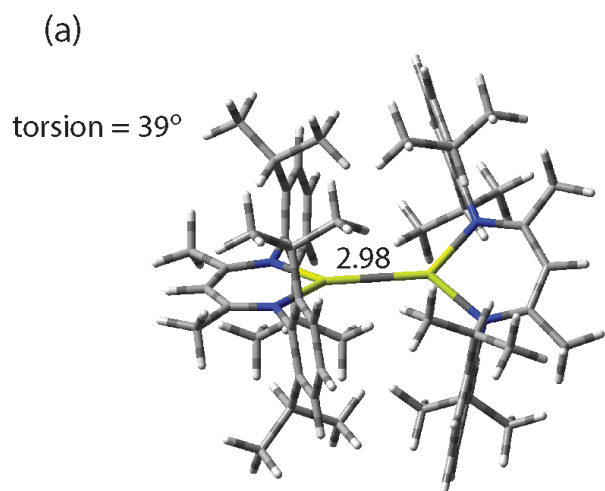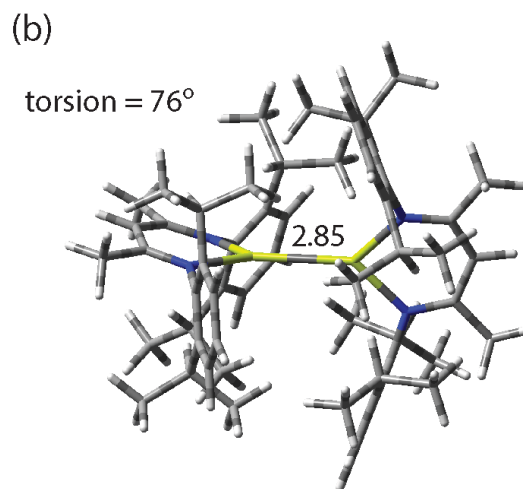

**Figure S17:** Graphical representations of Mg-C<sub>6</sub>F<sub>5</sub>/Mg-F species. Data quoted are for coordinates generated with ωB97XD functional and a hybrid 6,31G+(d,p) (C,H,N,O,F) / Lanl2DZ (Mg) basis-set. (a) [Mg]-C<sub>6</sub>F<sub>5</sub>(THF), (b) [Mg]-C<sub>6</sub>F<sub>5</sub>, (c) [Mg]-F/C<sub>6</sub>F<sub>5</sub>-[Mg] and (d) [Mg]-F-[Mg]-C<sub>6</sub>F<sub>5</sub>.

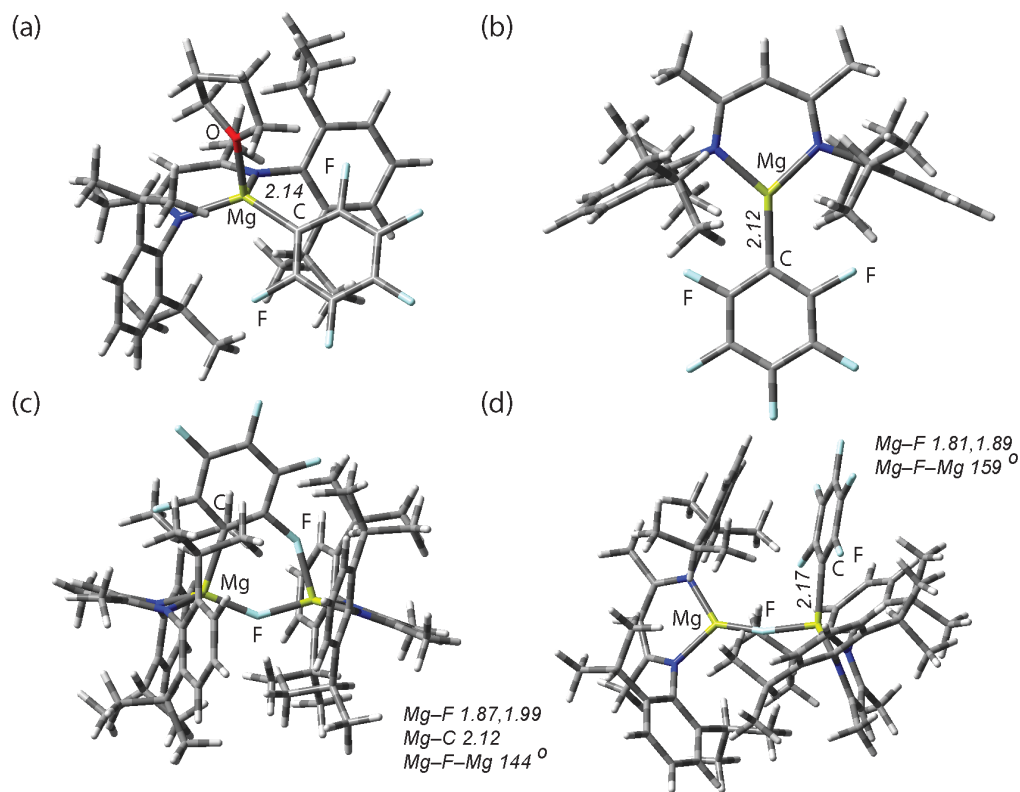

**Figure S18:** Graphical representations of Mg-F species. Data quoted are for coordinates generated with ωB97XD functional and a hybrid 6,31G+(d,p) (C,H,N,O,F) / Lanl2DZ (Mg) basis-set. (a) [Mg]-F, [Mg]-F/F-[Mg], (c) [Mg]-F-[Mg]-F and (d) [Mg]-F/F-[Mg](THF)<sub>2</sub>.

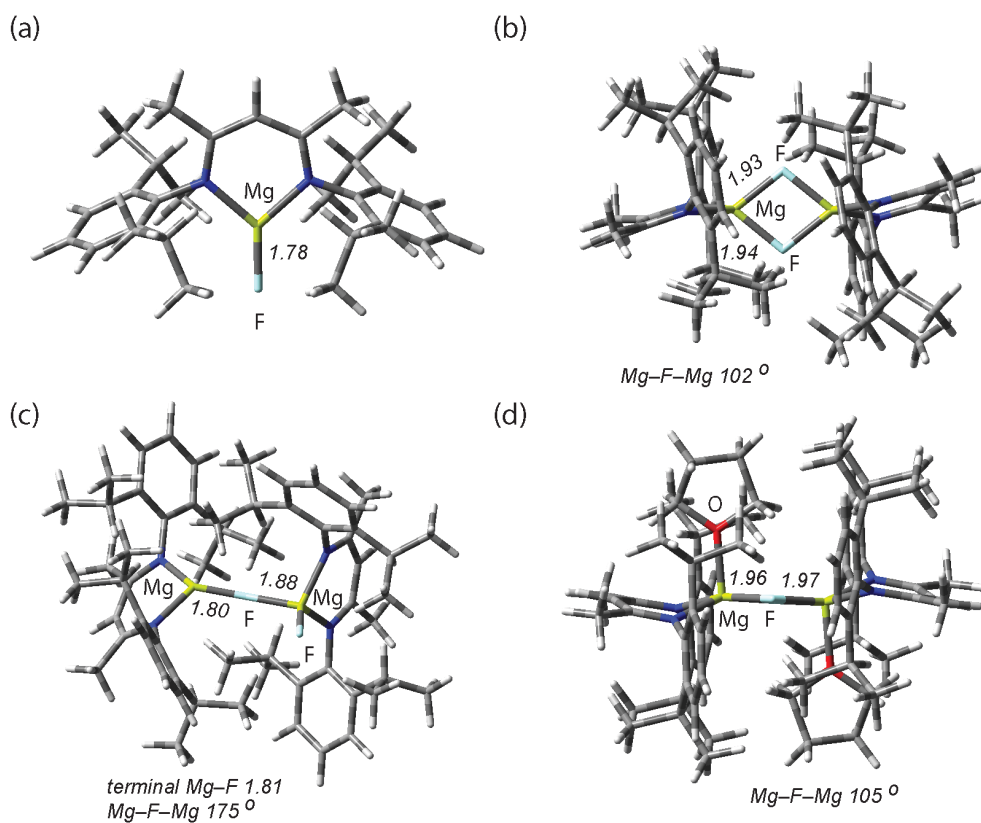

**Figure S19:** Graphical representations of  $[\text{Mg}]-\text{C}_6\text{F}_5/\text{C}_6\text{F}_5-[\text{Mg}]$ . Data quoted are for coordinates generated with  $\omega\text{B97XD}$  functional and a hybrid 6,31G+(d,p) (C,H,N,O,F) / Lanl2DZ (Mg) basis-set.

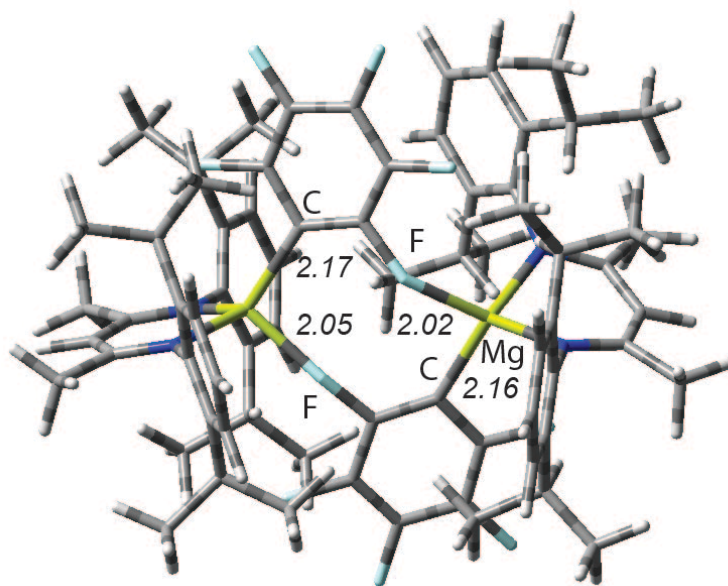

## 6. Z Matrices

[Mg]-[Mg] (2.9 A, torsion = 76°)

wB97X

6,31G+(d,p) / LanL2DZ

Sum of electronic and zero-point Energies=  
-2477.933597

Sum of electronic and thermal Energies=  
-2477.863112

Sum of electronic and thermal Enthalpies=  
-2477.862168

Sum of electronic and thermal Free Energies=  
-2478.039890

Low energy vibrations = 16.22, 27.29, 31.93 cm<sup>-1</sup>

0 1

|    |             |             |             |
|----|-------------|-------------|-------------|
| Mg | -1.14354700 | -0.94644100 | 0.28881600  |
| N  | -3.00649200 | -1.14748300 | 1.16558700  |
| N  | -1.34989200 | -2.75029300 | -0.69339900 |
| C  | -4.90166500 | -2.43007000 | 2.10023600  |
| C  | -3.63436800 | -2.33182500 | 1.27163600  |
| C  | -3.24703300 | -3.50773600 | 0.60724400  |
| C  | -2.25910200 | -3.67778200 | -0.38291400 |
| C  | -2.27059500 | -4.99390900 | -1.13313500 |
| C  | -3.70214100 | 0.02553600  | 1.63821100  |
| C  | -3.36789900 | 0.62292900  | 2.87106400  |
| C  | -4.09619600 | 1.74020200  | 3.29917700  |
| C  | -5.11411100 | 2.28090400  | 2.52338800  |
| C  | -5.40578400 | 1.71350000  | 1.28620100  |
| C  | -4.71589800 | 0.58928100  | 0.82576700  |
| C  | -2.24254100 | 0.09906800  | 3.75466700  |
| C  | -1.22422600 | 1.21079400  | 4.06027800  |
| C  | -2.78222600 | -0.51497600 | 5.05762100  |
| C  | -5.03542100 | 0.03533400  | -0.55988300 |
| C  | -4.43761000 | 0.94907600  | -1.64528300 |
| C  | -6.54257600 | -0.15746500 | -0.79238900 |
| C  | -0.42186500 | -2.96787600 | -1.77385300 |
| C  | 0.77693200  | -3.68109300 | -1.55181700 |
| C  | 1.70935000  | -3.76888700 | -2.59087400 |
| C  | 1.46589200  | -3.18626000 | -3.83086500 |
| C  | 0.27202400  | -2.50522800 | -4.04552300 |
| C  | -0.68226200 | -2.37702800 | -3.03027800 |
| C  | 1.09376500  | -4.33807000 | -0.21295000 |
| C  | 2.23767800  | -3.60662100 | 0.50562300  |
| C  | 1.43931100  | -5.82925100 | -0.37114900 |
| C  | -1.97733900 | -1.62298200 | -3.31562400 |
| C  | -1.70872200 | -0.19754400 | -3.82249500 |
| C  | -2.86078400 | -2.39607800 | -4.31045000 |
| H  | -4.79638100 | -1.90048400 | 3.05116800  |
| H  | -5.15119100 | -3.47370300 | 2.29939200  |
| H  | -5.74596200 | -1.97181500 | 1.57257500  |
| H  | -3.86477600 | -4.37638100 | 0.80156500  |
| H  | -2.32102200 | -4.82079200 | -2.21321700 |
| H  | -3.12222400 | -5.60760200 | -0.83620400 |
| H  | -1.35227600 | -5.55958400 | -0.94609700 |
| H  | -3.85890900 | 2.19236400  | 4.25838500  |
| H  | -5.66898600 | 3.14579600  | 2.87343500  |
| H  | -6.18411500 | 2.15225900  | 0.66815600  |
| H  | -1.72401600 | -0.69377900 | 3.20222400  |
| H  | -0.81606400 | 1.62971900  | 3.13289000  |
| H  | -0.39188600 | 0.82192700  | 4.65794700  |
| H  | -1.68464000 | 2.02889300  | 4.62594700  |
| H  | -3.31553500 | 0.23612700  | 5.65270300  |
| H  | -1.96009700 | -0.90779200 | 5.66791000  |
| H  | -3.47565500 | -1.33788400 | 4.85314600  |
| H  | -4.55920100 | -0.94629800 | -0.65612700 |

|    |             |             |             |
|----|-------------|-------------|-------------|
| H  | -4.88535300 | 1.94963200  | -1.59733700 |
| H  | -4.62929000 | 0.53674700  | -2.64355600 |
| H  | -3.35374300 | 1.06544600  | -1.52364500 |
| H  | -6.99420100 | -0.77815200 | -0.01060700 |
| H  | -6.71470100 | -0.64617200 | -1.75785300 |
| H  | -7.07437300 | 0.80076400  | -0.80885600 |
| H  | 2.64166300  | -4.30183000 | -2.42392700 |
| H  | 2.20074400  | -3.26567400 | -4.62592000 |
| H  | 0.07751400  | -2.06002800 | -5.01791300 |
| H  | 0.20294500  | -4.26265400 | 0.42074200  |
| H  | 3.16550700  | -3.65929400 | -0.07705200 |
| H  | 2.43256800  | -4.05597400 | 1.48622300  |
| H  | 2.00339100  | -2.54701400 | 0.65901800  |
| H  | 0.65872800  | -6.37559100 | -0.91213900 |
| H  | 1.56556200  | -6.29462700 | 0.61281700  |
| H  | 2.37801300  | -5.95968500 | -0.92188300 |
| H  | -2.53333100 | -1.54434800 | -2.37296700 |
| H  | -1.11111300 | 0.37619100  | -3.10504100 |
| H  | -2.64998700 | 0.34037300  | -3.98222900 |
| H  | -1.16771000 | -0.20757700 | -4.77688100 |
| H  | -2.35756700 | -2.50103100 | -5.27920100 |
| H  | -3.80633400 | -1.86620600 | -4.47538000 |
| H  | -3.09306100 | -3.40122600 | -3.94150700 |
| Mg | 1.07320400  | 0.91086200  | 0.39633300  |
| N  | 1.32463000  | 2.79263300  | -0.42438600 |
| N  | 2.91365800  | 1.01691200  | 1.33220100  |
| C  | 2.16503900  | 5.11803700  | -0.47622300 |
| C  | 2.17814700  | 3.69935600  | 0.06009500  |
| C  | 3.12946200  | 3.42746400  | 1.06418300  |
| C  | 3.52755200  | 2.18553000  | 1.58603000  |
| C  | 4.78161000  | 2.19645600  | 2.43982400  |
| C  | 0.48206800  | 3.11276900  | -1.54733700 |
| C  | 0.85876100  | 2.64020900  | -2.82824200 |
| C  | 0.02135300  | 2.91368200  | -3.91400400 |
| C  | -1.17553300 | 3.60570000  | -3.74573600 |
| C  | -1.54802100 | 4.03816400  | -2.47879700 |
| C  | -0.73079100 | 3.80967700  | -1.36524100 |
| C  | 2.15163700  | 1.84941000  | -3.02260200 |
| C  | 3.38091800  | 2.77227400  | -3.11333700 |
| C  | 2.11165200  | 0.90918200  | -4.23498200 |
| C  | -1.19192100 | 4.29886300  | 0.00302800  |
| C  | -2.40473400 | 3.49431700  | 0.49678000  |
| C  | -1.52511800 | 5.80132100  | -0.00353600 |
| C  | 3.61563500  | -0.19561700 | 1.67781600  |
| C  | 4.58564500  | -0.69641700 | 0.77764900  |
| C  | 5.30285000  | -1.84451300 | 1.12493300  |
| C  | 5.07066200  | -2.50097500 | 2.33003900  |
| C  | 4.08346900  | -2.02765900 | 3.18648000  |
| C  | 3.33579600  | -0.88535900 | 2.87550600  |
| C  | 4.82992900  | -0.05131500 | -0.58330600 |
| C  | 4.28767700  | -0.95943600 | -1.70258300 |
| C  | 6.31204900  | 0.27633900  | -0.82515700 |
| C  | 2.23242200  | -0.44659500 | 3.83039800  |
| C  | 2.78645600  | -0.02719400 | 5.20239300  |
| C  | 1.18679200  | -1.56463700 | 3.99101900  |
| H  | 2.03834400  | 5.13483100  | -1.56205000 |
| H  | 3.08957400  | 5.63821400  | -0.21975000 |
| H  | 1.32847700  | 5.67857800  | -0.04410000 |
| H  | 3.71374900  | 4.27911900  | 1.39158200  |
| H  | 4.64097300  | 1.61809000  | 3.35740000  |
| H  | 5.06153100  | 3.21765500  | 2.70336100  |
| H  | 5.61943400  | 1.73755700  | 1.90294800  |
| H  | 0.29503100  | 2.56464800  | -4.90394400 |
| H  | -1.81702500 | 3.79866100  | -4.59998100 |
| H  | -2.48969100 | 4.56431600  | -2.34746700 |
| H  | 2.28590800  | 1.22239600  | -2.12978800 |
| H  | 3.27516300  | 3.46882100  | -3.95409500 |
| H  | 4.28989200  | 2.17883100  | -3.27467800 |
| H  | 3.52088000  | 3.35386300  | -2.19723400 |



|   |             |             |             |
|---|-------------|-------------|-------------|
| H | 1.23139200  | 0.25862000  | -4.20959900 |
| H | 2.99945200  | 0.26765100  | -4.23650600 |
| H | 2.10987100  | 1.46643600  | -5.17944700 |
| H | -0.37547800 | 4.13425200  | 0.71540400  |
| H | -3.25801000 | 3.61617000  | -0.18196500 |
| H | -2.71686600 | 3.83016700  | 1.49211900  |
| H | -2.17743700 | 2.42406800  | 0.55890300  |
| H | -0.69992600 | 6.40130000  | -0.40224400 |
| H | -1.74274100 | 6.14546200  | 1.01379900  |
| H | -2.40986100 | 6.00537500  | -0.61772000 |
| H | 6.05250100  | -2.23219600 | 0.44000900  |
| H | 5.64398400  | -3.38503500 | 2.59127500  |
| H | 3.88611900  | -2.55444800 | 4.11655400  |
| H | 4.27309500  | 0.89195300  | -0.61945500 |
| H | 4.80361700  | -1.92790500 | -1.70209700 |
| H | 4.44223900  | -0.49424800 | -2.68379400 |
| H | 3.21529500  | -1.15692000 | -1.58078900 |
| H | 6.71385000  | 0.92162600  | -0.03621600 |
| H | 6.43251900  | 0.79565600  | -1.78300400 |
| H | 6.92348000  | -0.63292200 | -0.86069300 |
| H | 1.73534100  | 0.42501200  | 3.38790800  |
| H | 3.28394400  | -0.86866700 | 5.69928000  |
| H | 1.97485600  | 0.31606800  | 5.85500900  |
| H | 3.51373100  | 0.78655500  | 5.11041800  |
| H | 0.74731400  | -1.82804100 | 3.02173000  |
| H | 0.37863500  | -1.25049000 | 4.66191500  |
| H | 1.63838000  | -2.46943000 | 4.41416900  |

**[Mg]-[Mg] (3.0 A, torsion = 46 °)**

wB97X

**6,31G+(d,p) / LanL2DZ**

Sum of electronic and zero-point Energies=  
-2477.928809

Sum of electronic and thermal Energies=  
-2477.857931

Sum of electronic and thermal Enthalpies=  
-2477.856987

Sum of electronic and thermal Free Energies=  
-2478.037039

Low energy vibrations = 19.95 23.18 30.90 cm<sup>-1</sup>

0 1

|   |             |             |             |
|---|-------------|-------------|-------------|
| C | 1.16977200  | -4.28802200 | 0.49287900  |
| C | -1.16911500 | -4.28810700 | -0.49368200 |
| C | 0.00040400  | -4.88602000 | -0.00052500 |
| H | 0.00052200  | -5.96892100 | -0.00070400 |
| C | -1.16973200 | 4.28790200  | 0.49322600  |
| C | 1.16916400  | 4.28801000  | -0.49329500 |
| C | -0.00034100 | 4.88591600  | -0.00010200 |
| H | -0.00042000 | 5.96881800  | -0.00018200 |
| C | -2.26555400 | -5.24851600 | -0.91664600 |
| H | -3.12215800 | -5.17672700 | -0.23724000 |
| H | -2.63933700 | -5.01561000 | -1.91742200 |
| H | -1.90406700 | -6.27767400 | -0.90550500 |
| C | 2.26639500  | -5.24833900 | 0.91558500  |
| H | 3.12283500  | -5.17644700 | 0.23597600  |
| H | 2.64037200  | -5.01544000 | 1.91628600  |
| H | 1.90500600  | -6.27753300 | 0.90447100  |
| C | -2.26635000 | 5.24818400  | 0.91600700  |
| H | -3.12292900 | 5.17609900  | 0.23659600  |
| H | -2.64009300 | 5.01540800  | 1.91682800  |
| H | -1.90506400 | 6.27741000  | 0.90466100  |
| C | 2.26566900  | 5.24841600  | -0.91610000 |
| H | 3.12207100  | 5.17674600  | -0.23641600 |
| H | 2.63974300  | 5.01541700  | -1.91674400 |

|    |             |             |             |
|----|-------------|-------------|-------------|
| H  | 1.90414100  | 6.27756300  | -0.90516500 |
| C  | 2.66633900  | 2.54012600  | -1.07594900 |
| C  | 3.74347000  | 2.41301000  | -0.17139100 |
| C  | 2.85094300  | 2.28304000  | -2.45116300 |
| C  | 4.99327100  | 2.02310700  | -0.66262600 |
| C  | 4.12477400  | 1.92094600  | -2.90289300 |
| C  | 5.19219700  | 1.79244000  | -2.02048000 |
| H  | 5.82557700  | 1.91290400  | 0.02698300  |
| H  | 4.28120700  | 1.73516300  | -3.96241500 |
| H  | 6.17395800  | 1.51000200  | -2.38876300 |
| C  | -2.66659700 | 2.53986300  | 1.07619400  |
| C  | -2.85101800 | 2.28274800  | 2.45142500  |
| C  | -3.74379400 | 2.41258500  | 0.17174600  |
| C  | -4.12474100 | 1.92042100  | 2.90327800  |
| C  | -4.99346700 | 2.02240000  | 0.66308700  |
| C  | -5.19221600 | 1.79167900  | 2.02096000  |
| H  | -4.28105200 | 1.73464700  | 3.96281900  |
| H  | -5.82580600 | 1.91201100  | -0.02645300 |
| H  | -6.17388500 | 1.50903600  | 2.38933200  |
| C  | -2.66635500 | -2.54021600 | -1.07615700 |
| C  | -2.85098800 | -2.28302300 | -2.45134500 |
| C  | -3.74343100 | -2.41305000 | -0.17154100 |
| C  | -4.12481500 | -1.92082400 | -2.90300400 |
| C  | -4.99321800 | -2.02299800 | -0.66269900 |
| C  | -5.19219000 | -1.79227200 | -2.02053700 |
| H  | -4.28127900 | -1.73496500 | -3.96250800 |
| H  | -5.82546800 | -1.91269900 | 0.02696400  |
| H  | -6.17394500 | -1.50973900 | -2.38876300 |
| C  | 2.66659900  | -2.53997400 | 1.07597800  |
| C  | 3.74379700  | -2.41257500 | 0.17153600  |
| C  | 2.85097700  | -2.28286500 | 2.45121100  |
| C  | 4.99344000  | -2.02235400 | 0.66291300  |
| C  | 4.12467100  | -1.92046300 | 2.90309200  |
| C  | 5.19215600  | -1.79166100 | 2.02079900  |
| H  | 5.82579600  | -1.91192800 | -0.02660000 |
| H  | 4.28094800  | -1.73467000 | 3.96263500  |
| H  | 6.17380500  | -1.50898200 | 2.38919500  |
| Mg | -0.00012500 | 1.50267400  | 0.00000700  |
| Mg | 0.00010300  | -1.50280000 | -0.00008600 |
| C  | -1.71227300 | 2.40599800  | 3.45754900  |
| H  | -0.80639000 | 2.67862100  | 2.90360200  |
| C  | -3.57308100 | 2.68942900  | -1.31800100 |
| H  | -2.59679600 | 3.16549200  | -1.46189200 |
| C  | 3.57256100  | 2.68969400  | 1.31836400  |
| H  | 2.59620300  | 3.16562600  | 1.46220400  |
| C  | 1.71227000  | 2.40603300  | -3.45739000 |
| H  | 0.80629500  | 2.67856400  | -2.90355300 |
| C  | -3.57250300 | -2.68981900 | 1.31819700  |
| H  | -2.59626400 | -3.16601300 | 1.46197300  |
| C  | -1.71233300 | -2.40594800 | -3.45760300 |
| H  | -0.80636400 | -2.67856100 | -2.90379000 |
| C  | 3.57309200  | -2.68925600 | -1.31823900 |
| H  | 2.59692500  | -3.16554600 | -1.46216900 |
| C  | 1.71222000  | -2.40619200 | 3.45730700  |
| H  | 0.80635700  | -2.67882300 | 2.90333200  |
| N  | 1.37479200  | -2.96419900 | 0.58581600  |
| N  | -1.37440500 | -2.96429800 | -0.58623400 |
| N  | -1.37477100 | 2.96407500  | 0.58606100  |
| N  | 1.37440700  | 2.96420900  | -0.58599100 |
| C  | -3.57964400 | 1.37414700  | -2.11140100 |
| H  | -4.55061700 | 0.87491000  | -2.02321000 |
| H  | -3.38443400 | 1.55636400  | -3.17558300 |
| H  | -2.82404100 | 0.67426600  | -1.73538000 |
| C  | -4.64347700 | 3.64839000  | -1.86483400 |
| H  | -5.64216600 | 3.19914200  | -1.81883100 |
| H  | -4.67265400 | 4.58838900  | -1.30249700 |
| H  | -4.43583300 | 3.88482000  | -2.91445500 |
| C  | -1.97947000 | 3.51196500  | 4.49326800  |
| H  | -2.12322800 | 4.48632000  | 4.01430600  |

|   |             |             |             |
|---|-------------|-------------|-------------|
| H | -2.87768100 | 3.29010800  | 5.08176800  |
| H | -1.13540800 | 3.59654100  | 5.18713900  |
| C | -1.44943000 | 1.06594000  | 4.16400300  |
| H | -0.59974600 | 1.15438400  | 4.85118300  |
| H | -2.32320900 | 0.74862200  | 4.74625400  |
| H | -1.22299600 | 0.27627600  | 3.43912400  |
| C | 1.44971300  | 1.06586400  | -4.16372700 |
| H | 0.60005100  | 1.15407600  | -4.85096800 |
| H | 2.32359400  | 0.74863700  | -4.74587800 |
| H | 1.22338000  | 0.27623800  | -3.43877400 |
| C | 1.97939700  | 3.51196200  | -4.49317300 |
| H | 2.12312700  | 4.48634100  | -4.01424800 |
| H | 2.87760100  | 3.29012100  | -5.08168700 |
| H | 1.13531700  | 3.59647400  | -5.18703000 |
| C | 4.64279400  | 3.64871600  | 1.86539900  |
| H | 4.67187600  | 4.58879500  | 1.30319000  |
| H | 4.43505700  | 3.88497700  | 2.91503800  |
| H | 5.64154800  | 3.19961000  | 1.81939000  |
| C | 3.57919400  | 1.37432000  | 2.11162900  |
| H | 2.82364400  | 0.67443200  | 1.73551500  |
| H | 4.55020300  | 0.87514300  | 2.02343100  |
| H | 3.38393300  | 1.55642500  | 3.17582000  |
| C | -1.44972600 | -1.06571900 | -4.16382000 |
| H | -0.59999100 | -1.15388400 | -4.85097300 |
| H | -2.32354500 | -0.74848000 | -4.74606100 |
| H | -1.22350200 | -0.27612800 | -3.43880400 |
| C | -1.97949600 | -3.51172200 | -4.49354300 |
| H | -2.12311900 | -4.48620300 | -4.01479800 |
| H | -2.87777300 | -3.28982100 | -5.08192600 |
| H | -1.13547500 | -3.59605400 | -5.18749400 |
| C | -3.57873500 | -1.37447600 | 2.11150500  |
| H | -4.54961100 | -0.87502600 | 2.02341600  |
| H | -3.38344400 | -1.55668000 | 3.17567700  |
| H | -2.82301600 | -0.67479300 | 1.73535700  |
| C | -4.64296700 | -3.64857500 | 1.86524700  |
| H | -5.64161500 | -3.19923600 | 1.81920600  |
| H | -4.67225300 | -4.58866700 | 1.30307400  |
| H | -4.43529100 | -3.88485500 | 2.91489500  |
| C | 3.57929300  | -1.37385100 | -2.11145800 |
| H | 4.55013700  | -0.87436200 | -2.02320900 |
| H | 3.38413300  | -1.55600000 | -3.17566100 |
| H | 2.82349700  | -0.67422700 | -1.73535500 |
| C | 4.64371500  | -3.64785600 | -1.86526000 |
| H | 5.64229800  | -3.19837500 | -1.81920700 |
| H | 4.67313200  | -4.58794400 | -1.30308200 |
| H | 4.43610600  | -3.88416300 | -2.91491500 |
| C | 1.97944000  | -3.51220400 | 4.49298000  |
| H | 2.12323000  | -4.48653500 | 4.01398100  |
| H | 2.87764000  | -3.29033800 | 5.08149300  |
| H | 1.13537300  | -3.59683400 | 5.18683900  |
| C | 1.44931000  | -1.06618700 | 4.16382700  |
| H | 0.59957400  | -1.15468500 | 4.85093600  |
| H | 2.32304000  | -0.74889000 | 4.74616700  |
| H | 1.22291900  | -0.27647900 | 3.43898500  |

**[Mg]-F  
wB97X  
6,31G+(d,p) / Lanl2DZ**

Sum of electronic and zero-point Energies=  
-1338.852059  
Sum of electronic and thermal Energies=  
-1338.816133

Sum of electronic and thermal Enthalpies=  
-1338.815188  
Sum of electronic and thermal Free Energies=  
-1338.919897

Low energy vibrations = 29.08 31.86 47.5 cm<sup>-1</sup>

|     |             |             |             |
|-----|-------------|-------------|-------------|
| 0 1 |             |             |             |
| Mg  | 0.00006300  | -0.18937500 | -0.72066400 |
| N   | 1.47740900  | 0.08642300  | 0.58051500  |
| C   | 1.27227000  | 0.23504400  | 1.89656000  |
| C   | -0.00000300 | 0.30231500  | 2.49659200  |
| H   | -0.00002600 | 0.41869000  | 3.57339100  |
| C   | 2.47234700  | 0.32500000  | 2.81371300  |
| H   | 3.10065500  | -0.56649800 | 2.70988400  |
| H   | 2.16643300  | 0.42026100  | 3.85623500  |
| H   | 3.09940100  | 1.18450300  | 2.55207300  |
| C   | 2.81601400  | 0.02755700  | 0.04691700  |
| C   | 3.40170900  | -1.22903800 | -0.20603400 |
| C   | 4.66380300  | -1.26598800 | -0.80862500 |
| H   | 5.12721100  | -2.22548200 | -1.01837800 |
| C   | 5.33023100  | -0.09433300 | -1.15093900 |
| H   | 6.30760500  | -0.14201700 | -1.62047000 |
| C   | 4.73657700  | 1.14035000  | -0.90121400 |
| H   | 5.25955400  | 2.04912100  | -1.18284000 |
| C   | 3.47573500  | 1.22429700  | -0.30448000 |
| C   | 2.66755300  | -2.52635900 | 0.11360600  |
| H   | 1.83200400  | -2.28065800 | 0.78119900  |
| C   | 2.08181900  | -3.14745900 | -1.17023300 |
| H   | 1.41415900  | -2.45888700 | -1.70327100 |
| H   | 1.51940200  | -4.05831700 | -0.93072500 |
| H   | 2.88879200  | -3.42163700 | -1.86062500 |
| C   | 3.55747800  | -3.53816800 | 0.85154500  |
| H   | 4.37497600  | -3.89330800 | 0.21388900  |
| H   | 2.96781500  | -4.41314100 | 1.14648200  |
| H   | 3.99843900  | -3.10033300 | 1.75407300  |
| C   | 2.79663200  | 2.57503600  | -0.10640600 |
| H   | 2.03592900  | 2.45880600  | 0.67445900  |
| C   | 2.07057900  | 2.99399200  | -1.39825400 |
| H   | 2.78965800  | 3.13591500  | -2.21325500 |
| H   | 1.52213300  | 3.93197000  | -1.25334100 |
| H   | 1.35712600  | 2.22803600  | -1.72757300 |
| N   | -1.47737300 | 0.08630600  | 0.58047700  |
| C   | -1.27225600 | 0.23489700  | 1.89652200  |
| C   | -2.47236700 | 0.32470000  | 2.81365400  |
| H   | -3.10052500 | -0.56690200 | 2.70981800  |
| H   | -2.16648900 | 0.42001300  | 3.85618200  |
| H   | -3.09955300 | 1.18409900  | 2.55199600  |
| C   | -2.81596300 | 0.02732700  | 0.04687700  |
| C   | -3.40139400 | -1.22931600 | -0.20650600 |
| C   | -4.66348400 | -1.26631900 | -0.80908100 |
| H   | -5.12668000 | -2.22583800 | -1.01920000 |
| C   | -5.33021100 | -0.09468500 | -1.15092100 |
| H   | -6.30760700 | -0.14244300 | -1.62040000 |
| C   | -4.73683300 | 1.14002900  | -0.90076100 |
| H   | -5.26001500 | 2.04881600  | -1.18195400 |
| C   | -3.47595900 | 1.22403300  | -0.30406900 |
| C   | -2.66704800 | -2.52664100 | 0.11272900  |
| H   | -1.83127500 | -2.28097900 | 0.78006400  |
| C   | -2.08169400 | -3.14753900 | -1.17138000 |
| H   | -1.41410700 | -2.45884600 | -1.70435700 |
| H   | -1.51923900 | -4.05845300 | -0.93216500 |
| H   | -2.88881400 | -3.42158500 | -1.86163900 |
| C   | -3.55673000 | -3.53849000 | 0.85089500  |
| H   | -4.37457900 | -3.89339900 | 0.21355900  |
| H   | -2.96703800 | -4.41358200 | 1.14541400  |
| H   | -3.99722500 | -3.10074700 | 1.75369600  |
| C   | -2.79714000 | 2.57483700  | -0.10555700 |
| H   | -2.03654300 | 2.45857100  | 0.67541100  |

|   |             |             |             |
|---|-------------|-------------|-------------|
| C | -3.76254100 | 3.67765300  | 0.35113800  |
| H | -3.20515000 | 4.58966700  | 0.59134400  |
| H | -4.48536200 | 3.93372600  | -0.43153400 |
| H | -4.32250500 | 3.37327900  | 1.24218100  |
| C | -2.07091900 | 2.99419100  | -1.39718700 |
| H | -2.78988000 | 3.13608000  | -2.21230100 |
| H | -1.52272700 | 3.93227200  | -1.25199200 |
| H | -1.35722800 | 2.22845600  | -1.72650300 |
| F | -0.00003000 | -0.82378200 | -2.38922800 |
| C | 3.76178300  | 3.67808000  | 0.35023000  |
| H | 4.48486600  | 3.93395600  | -0.43226300 |
| H | 3.20426500  | 4.59015300  | 0.58994000  |
| H | 4.32147800  | 3.37407600  | 1.24156700  |

**[Mg]-F-[Mg]-C<sub>6</sub>F<sub>5</sub>  
wB97X  
6,31G+(d,p) / Lanl2DZ**

Sum of electronic and zero-point Energies=  
-3305.314760

Sum of electronic and thermal Energies=  
-3305.234572

Sum of electronic and thermal Enthalpies=  
-3305.233628

Sum of electronic and thermal Free Energies=  
-3305.428193

Lowest energy frequencies = 23.23 32.60 37.87cm<sup>-1</sup>

|     |             |             |             |
|-----|-------------|-------------|-------------|
| 0 1 |             |             |             |
| Mg  | -1.35403300 | -0.85492500 | 0.23668700  |
| N   | -1.76143400 | -2.85168300 | 0.05183700  |
| C   | -1.77057900 | -3.68398700 | 1.10187900  |
| C   | -1.76429100 | -3.27322200 | 2.44844500  |
| H   | -1.76748800 | -4.07430500 | 3.17797000  |
| C   | -1.86035300 | -1.97381600 | 2.98080000  |
| N   | -1.80047500 | -0.85288800 | 2.25256800  |
| C   | -1.80267500 | -5.18217700 | 0.86430300  |
| H   | -2.58977600 | -5.45732100 | 0.15677500  |
| H   | -1.96427400 | -5.72166500 | 1.79884900  |
| H   | -0.85372300 | -5.51787500 | 0.43092700  |
| C   | -2.02654000 | -1.88352100 | 4.48624300  |
| H   | -2.29024000 | -2.85449300 | 4.90849300  |
| H   | -2.79347200 | -1.15587700 | 4.76427200  |
| H   | -1.09018800 | -1.55203000 | 4.95061100  |
| C   | -1.96051600 | -3.39450000 | -1.26959600 |
| C   | -3.26229600 | -3.36783800 | -1.82539400 |
| C   | -3.44385500 | -3.88912900 | -3.10916600 |
| H   | -4.43087700 | -3.87613400 | -3.55811000 |
| C   | -2.37479300 | -4.40503700 | -3.83821400 |
| H   | -2.53911100 | -4.80040500 | -4.83583600 |
| C   | -1.09744100 | -4.39693900 | -3.29191900 |
| H   | -0.26378500 | -4.78462600 | -3.87133800 |
| C   | -0.86781900 | -3.89724200 | -2.00480600 |
| C   | -4.43713100 | -2.76843800 | -1.05148400 |
| H   | -4.05280600 | -1.88024100 | -0.53097000 |
| C   | -5.58849100 | -2.30403300 | -1.95519800 |
| H   | -5.22900200 | -1.65218500 | -2.75448300 |
| H   | -6.31777600 | -1.74524500 | -1.35694900 |
| H   | -6.11880700 | -3.15469000 | -2.40058800 |
| C   | -4.99019800 | -3.72924100 | 0.01858900  |
| H   | -5.29016700 | -4.68013900 | -0.43921600 |
| H   | -5.87578500 | -3.28942000 | 0.49377700  |
| H   | -4.26161600 | -3.93411400 | 0.80715600  |
| C   | 0.55282700  | -3.87553300 | -1.45089200 |
| H   | 0.49934300  | -3.62470800 | -0.38513400 |
| C   | 1.26332600  | -5.23266000 | -1.57860700 |
| H   | 0.67508600  | -6.04024400 | -1.12870800 |
| H   | 2.23796800  | -5.19252200 | -1.07808400 |

|    |             |             |             |
|----|-------------|-------------|-------------|
| H  | 1.43847700  | -5.49378200 | -2.62879500 |
| C  | 1.38464500  | -2.77709500 | -2.13568400 |
| H  | 1.48478200  | -2.97796800 | -3.21008600 |
| H  | 2.38944700  | -2.73748300 | -1.69605000 |
| H  | 0.90445800  | -1.79976000 | -2.01639400 |
| C  | -2.09323400 | 0.41329700  | 2.87256900  |
| C  | -1.08186700 | 1.16116600  | 3.50975200  |
| C  | -1.40907700 | 2.40194900  | 4.06419300  |
| H  | -0.63719000 | 2.98793700  | 4.55764800  |
| C  | -2.70216700 | 2.90791600  | 3.97782400  |
| H  | -2.93971400 | 3.87478200  | 4.40997600  |
| C  | -3.68641900 | 2.17614800  | 3.31883800  |
| H  | -4.68897200 | 2.58546300  | 3.23670000  |
| C  | -3.40372500 | 0.92892100  | 2.75347400  |
| C  | 0.36472900  | 0.68082200  | 3.54047400  |
| H  | 0.38116800  | -0.31739600 | 3.09218400  |
| C  | 0.93447200  | 0.58280100  | 4.96409900  |
| H  | 0.97635600  | 1.56939500  | 5.44018900  |
| H  | 1.95522800  | 0.18009600  | 4.94211200  |
| H  | 0.32397000  | -0.06612000 | 5.60034800  |
| C  | 1.25804000  | 1.59620700  | 2.68168000  |
| H  | 0.79630200  | 1.77720100  | 1.70360400  |
| H  | 2.27187200  | 1.17754200  | 2.57671200  |
| H  | 1.37486700  | 2.58317100  | 3.14476300  |
| C  | -4.49523700 | 0.14023300  | 2.03506400  |
| H  | -3.99618300 | -0.59148200 | 1.38904400  |
| C  | -5.38162100 | 1.01699500  | 1.13800900  |
| H  | -6.01511300 | 1.69242800  | 1.72489700  |
| H  | -6.04471200 | 0.38272400  | 0.53781100  |
| H  | -4.77921300 | 1.62320800  | 0.45330400  |
| C  | -5.35996600 | -0.65278400 | 3.03160400  |
| H  | -4.75882100 | -1.36938500 | 3.60113900  |
| H  | -6.13801400 | -1.21404600 | 2.50047200  |
| H  | -5.85040700 | 0.02463700  | 3.74148200  |
| C  | -2.22263200 | 0.77626700  | -0.91776400 |
| C  | -2.04995100 | 2.04266300  | -0.38778700 |
| F  | -1.16740800 | 2.19510700  | 0.69265200  |
| C  | -2.67732500 | 3.19173000  | -0.84230800 |
| F  | -2.50147700 | 4.41317800  | -0.23257900 |
| C  | -3.49350500 | 3.09203200  | -1.95936700 |
| C  | -3.67345400 | 1.85933000  | -2.57117400 |
| F  | -4.46803900 | 1.76689900  | -3.69068900 |
| C  | -3.03959100 | 0.74451500  | -2.03542800 |
| F  | -3.24316700 | -0.46063200 | -2.70444900 |
| F  | -4.09870400 | 4.21534900  | -2.47178300 |
| F  | 0.51766400  | -0.49188500 | 0.05135800  |
| Mg | 2.08111200  | 0.44861200  | 0.01309800  |
| N  | 2.56355500  | 2.33094800  | -0.52963500 |
| N  | 3.90227400  | -0.27453600 | 0.39335500  |
| C  | 3.80824000  | 2.74250500  | -0.28573200 |
| C  | 1.59456200  | 3.16352800  | -1.21354300 |
| C  | 4.84087300  | 0.62972200  | 0.75047000  |
| C  | 4.22881500  | -1.68129700 | 0.36927500  |
| C  | 4.77559000  | 1.99512200  | 0.44514300  |
| C  | 4.31349400  | 4.07604000  | -0.79524200 |
| C  | 1.10515600  | 2.73064200  | -2.46776500 |
| C  | 1.08287300  | 4.34344100  | -0.61913300 |
| C  | 6.04614900  | 0.16211000  | 1.54100600  |
| C  | 4.94617900  | -2.22043100 | -0.73198500 |
| C  | 3.78541300  | -2.53012500 | 1.40659100  |
| H  | 5.65214900  | 2.56859800  | 0.72689300  |
| H  | 3.59973200  | 4.56860600  | -1.45526100 |
| H  | 5.24876100  | 3.91767200  | -1.34005100 |
| H  | 4.53225700  | 4.74551000  | 0.04290100  |
| C  | 0.14751900  | 3.50516000  | -3.12963900 |
| C  | 1.62887400  | 1.47985700  | -3.16075600 |
| C  | 0.13461400  | 5.08856500  | -1.32812900 |
| C  | 1.47890500  | 4.84342500  | 0.76916800  |
| H  | 6.47685500  | -0.75487600 | 1.13441600  |

|   |             |             |             |    |             |             |             |
|---|-------------|-------------|-------------|----|-------------|-------------|-------------|
| H | 6.82053400  | 0.93007800  | 1.57758300  | N  | -1.80216300 | 2.63718900  | -1.56441300 |
| H | 5.73054400  | -0.05667500 | 2.56879200  | C  | -2.85346300 | 2.97726300  | -2.32858200 |
| C | 5.20053300  | -3.59761700 | -0.74807900 | C  | -3.96644500 | 2.15352600  | -2.57275900 |
| C | 5.49181700  | -1.43645900 | -1.93222500 | H  | -4.71704700 | 2.57791200  | -3.22791900 |
| C | 4.05705300  | -3.90204000 | 1.33439700  | C  | -2.86316800 | 4.32511600  | -3.02502100 |
| C | 3.03497000  | -2.01696200 | 2.62882400  | H  | -2.56194200 | 5.13030600  | -2.35067000 |
| H | -0.22597400 | 3.17963400  | -4.09572000 | H  | -3.85483900 | 4.54778800  | -3.42156300 |
| C | -0.33220100 | 4.68390900  | -2.57277500 | H  | -2.15256700 | 4.32648400  | -3.85995900 |
| H | 2.17951200  | 0.87917500  | -2.42570800 | C  | -0.73848400 | 3.59926600  | -1.39348600 |
| C | 0.51070800  | 0.59547400  | -3.73238000 | C  | -0.70881400 | 4.40214600  | -0.23100600 |
| C | 2.64540100  | 1.86323500  | -4.25059500 | C  | 0.32203000  | 5.34008800  | -0.10391900 |
| H | -0.27009600 | 5.98954900  | -0.87903700 | H  | 0.35958400  | 5.97866100  | 0.77223900  |
| H | 2.21297600  | 4.14723200  | 1.19387500  | C  | 1.31742300  | 5.45367000  | -1.06964900 |
| C | 0.26117000  | 4.88353700  | 1.71389300  | H  | 2.11626100  | 6.17827200  | -0.94366600 |
| H | 5.74699500  | -4.01580700 | -1.58905000 | C  | 1.29325800  | 4.63215800  | -2.19161600 |
| C | 4.76415200  | -4.44011300 | 0.26898900  | H  | 2.08526900  | 4.71287700  | -2.92935200 |
| H | 5.72812900  | -2.21185500 | -2.67423100 | C  | 0.26189700  | 3.70770500  | -2.38293200 |
| C | 6.81820600  | -0.70678500 | -1.64506800 | C  | -1.77383400 | 4.26885500  | 0.85736600  |
| C | 4.50492000  | -0.48396400 | -2.61801000 | H  | -2.04853000 | 3.20846400  | 0.92292200  |
| H | 3.71262800  | -4.55374800 | 2.13224400  | C  | -1.27254600 | 4.69603500  | 2.24541300  |
| H | 2.90813000  | -0.93294200 | 2.51874400  | H  | -0.31708300 | 4.22011600  | 2.49356700  |
| C | 3.84215600  | -2.25634000 | 3.91745500  | H  | -2.00559300 | 4.40783100  | 3.00428700  |
| C | 1.64149400  | -2.65802900 | 2.73506600  | H  | -1.13848200 | 5.78214300  | 2.30948400  |
| H | -1.08292400 | 5.27106200  | -3.09224400 | C  | -3.05574100 | 5.04980900  | 0.51233700  |
| H | -0.24219100 | 0.36106700  | -2.97152300 | H  | -2.82272100 | 6.10614500  | 0.33027100  |
| H | 0.92831300  | -0.34638300 | -4.10608700 | H  | -3.76468200 | 4.99669100  | 1.34631700  |
| H | 0.00005500  | 1.08163800  | -4.57064900 | H  | -3.55396400 | 4.64523900  | -0.37312400 |
| H | 2.16829600  | 2.49916000  | -5.00521100 | C  | 0.24040800  | 2.82725600  | -3.62833700 |
| H | 3.03426600  | 0.96969200  | -4.75130600 | H  | -0.78581400 | 2.47327700  | -3.77660200 |
| H | 3.48939900  | 2.41760000  | -3.82430700 | C  | 0.65270900  | 3.58490700  | -4.89985100 |
| H | -0.45273700 | 5.64916100  | 1.39001700  | H  | 0.48096900  | 2.95749300  | -5.78128100 |
| H | 0.58334100  | 5.13651900  | 2.73185100  | H  | 1.71753000  | 3.84339900  | -4.88592800 |
| H | -0.27528800 | 3.93374100  | 1.73667300  | H  | 0.08152100  | 4.51237500  | -5.02076600 |
| H | 4.97193200  | -5.50450000 | 0.22612200  | N  | -3.45639400 | 0.15613700  | -1.27808300 |
| H | 7.52286500  | -1.35365200 | -1.11125300 | C  | -4.25857400 | 0.86663800  | -2.08676100 |
| H | 7.28414900  | -0.40486800 | -2.59030500 | C  | -5.56234600 | 0.25749500  | -2.56610700 |
| H | 6.65707700  | 0.20126700  | -1.05582900 | H  | -6.10974900 | -0.22629100 | -1.75423800 |
| H | 4.35772700  | 0.43009800  | -2.03598700 | H  | -6.20085000 | 1.01597700  | -3.02130300 |
| H | 4.90193700  | -0.19224200 | -3.59742700 | H  | -5.36101900 | -0.51603600 | -3.31730000 |
| H | 3.53256400  | -0.96389400 | -2.78084800 | C  | -3.91987400 | -1.12327000 | -0.79440300 |
| H | 3.32388300  | -1.82195500 | 4.78019400  | C  | -4.56146500 | -1.19597700 | 0.46148400  |
| H | 3.96726600  | -3.32843600 | 4.10818300  | C  | -5.00622400 | -2.44631200 | 0.90648000  |
| H | 4.84059300  | -1.81015000 | 3.85358700  | H  | -5.51622800 | -2.52236300 | 1.86201100  |
| H | 1.70979900  | -3.75070400 | 2.78328000  | C  | -4.79520000 | -3.59610600 | 0.15226200  |
| H | 1.12775900  | -2.32142500 | 3.64311800  | H  | -5.14021300 | -4.55814400 | 0.51930500  |
| H | 1.01335000  | -2.40055400 | 1.87516500  | C  | -4.14389600 | -3.51080100 | -1.07504800 |
| C | 2.11160900  | 6.24809500  | 0.71636100  | H  | -3.97717700 | -4.41355800 | -1.65418000 |
| H | 1.36790500  | 6.99019300  | 0.40460500  | C  | -3.71338900 | -2.27927400 | -1.57749300 |
| H | 2.47066100  | 6.53858100  | 1.71036000  | C  | -4.80620500 | 0.04749200  | 1.31341500  |
| H | 2.94934700  | 6.30661400  | 0.01626800  | H  | -4.09936200 | 0.81877500  | 0.98862300  |
|   |             |             |             | C  | -4.55882200 | -0.20242800 | 2.80886500  |
|   |             |             |             | H  | -3.57284000 | -0.64707300 | 2.97947800  |
|   |             |             |             | H  | -4.60527500 | 0.74283500  | 3.35727400  |
|   |             |             |             | H  | -5.31214300 | -0.87403300 | 3.23661600  |
|   |             |             |             | C  | -6.22709800 | 0.60338100  | 1.10482500  |
|   |             |             |             | H  | -6.97784700 | -0.15976200 | 1.34378600  |
|   |             |             |             | H  | -6.39667900 | 1.46500500  | 1.76033900  |
|   |             |             |             | H  | -6.38797700 | 0.93144500  | 0.07315100  |
|   |             |             |             | C  | -3.03294100 | -2.19451500 | -2.93978000 |
|   |             |             |             | H  | -3.15476300 | -1.17105200 | -3.31270700 |
|   |             |             |             | C  | -3.66201500 | -3.13603700 | -3.97802100 |
|   |             |             |             | H  | -3.23621800 | -2.93775400 | -4.96768200 |
|   |             |             |             | H  | -3.46177000 | -4.18735000 | -3.74229900 |
|   |             |             |             | H  | -4.74815400 | -3.00246800 | -4.03716700 |
|   |             |             |             | C  | -1.52475200 | -2.46472500 | -2.82038600 |
|   |             |             |             | H  | -1.34497300 | -3.47021200 | -2.42465000 |
|   |             |             |             | H  | -1.04372600 | -2.39103000 | -3.80342500 |
|   |             |             |             | H  | -1.02965400 | -1.75453900 | -2.14821700 |
|   |             |             |             | Mg | 1.37987900  | -0.81381400 | 0.47842700  |

**[Mg]-C<sub>6</sub>F<sub>5</sub>/F-[Mg]**  
**wB97X**  
**6,31G+(d,p) / Lanl2DZ**

Sum of electronic and zero-point Energies=  
-3305.342040  
Sum of electronic and thermal Energies=  
-3305.261815  
Sum of electronic and thermal Enthalpies=  
-3305.260870  
Sum of electronic and thermal Free Energies=  
-3305.455814

Lowest energy vibrations = 20.18 31.77 35.01 cm<sup>-1</sup>

0 1  
Mg -1.60663700 0.79364000 -0.75802400

|   |             |             |             |
|---|-------------|-------------|-------------|
| N | 3.37715000  | -0.33658300 | 0.28588600  |
| C | 4.25787200  | -1.07572200 | 0.97995800  |
| C | 4.00307400  | -2.36697500 | 1.47627700  |
| H | 4.80574600  | -2.80826300 | 2.05398200  |
| C | 5.63925300  | -0.52041900 | 1.26998400  |
| H | 6.08230300  | -0.04393000 | 0.39203700  |
| H | 6.30992000  | -1.30682000 | 1.61979400  |
| H | 5.56998300  | 0.24169100  | 2.05472100  |
| C | 3.85415400  | 0.84190600  | -0.39411200 |
| C | 4.27737500  | 0.72460200  | -1.74139200 |
| C | 4.74537000  | 1.87010000  | -2.39356700 |
| H | 5.08368700  | 1.80114600  | -3.42209600 |
| C | 4.77246700  | 3.10743100  | -1.75333800 |
| H | 5.13414800  | 3.98502300  | -2.28086300 |
| C | 4.33677800  | 3.21174500  | -0.43831800 |
| H | 4.35233300  | 4.17837300  | 0.05803300  |
| C | 3.88719200  | 2.08803500  | 0.26465300  |
| C | 4.22337200  | -0.61834700 | -2.47142700 |
| H | 3.31813800  | -1.13352300 | -2.12050300 |
| C | 4.13118300  | -0.47358100 | -3.99811200 |
| H | 3.32692300  | 0.20294000  | -4.29978700 |
| H | 3.94078000  | -1.45219300 | -4.45143200 |
| H | 5.07184400  | -0.10067800 | -4.42108400 |
| C | 5.42550300  | -1.52359600 | -2.13619000 |
| H | 6.36680800  | -1.01237400 | -2.37331800 |
| H | 5.37906900  | -2.44216000 | -2.73513300 |
| H | 5.44373600  | -1.81861900 | -1.08456500 |
| C | 3.44959100  | 2.24200300  | 1.71593800  |
| H | 3.26265100  | 1.24168600  | 2.12035600  |
| C | 2.14434200  | 3.04794200  | 1.80941700  |
| H | 2.30239600  | 4.08263000  | 1.48485300  |
| H | 1.77543500  | 3.06577100  | 2.84374400  |
| H | 1.36336300  | 2.62357500  | 1.16829900  |
| N | 1.77968500  | -2.82382900 | 0.60898200  |
| C | 2.91216900  | -3.21237000 | 1.21526700  |
| C | 3.08100000  | -4.66432100 | 1.61430300  |
| H | 3.22551600  | -5.29264000 | 0.72795700  |
| H | 3.94760600  | -4.78834700 | 2.26539000  |
| H | 2.19221600  | -5.04027400 | 2.12894800  |
| C | 0.84941400  | -3.83476000 | 0.17902500  |
| C | 1.06620700  | -4.49825100 | -1.04971500 |
| C | 0.13464000  | -5.45155200 | -1.47212200 |
| H | 0.29188000  | -5.96912700 | -2.41493100 |
| C | -0.99523200 | -5.74192400 | -0.71135400 |
| H | -1.71217300 | -6.48030600 | -1.05782700 |
| C | -1.19509300 | -5.08711500 | 0.49973400  |
| H | -2.07478200 | -5.31697700 | 1.09516300  |
| C | -0.27596200 | -4.14321500 | 0.97132700  |
| C | 2.27418400  | -4.18761800 | -1.92812000 |
| H | 2.95145900  | -3.54067200 | -1.35888600 |
| C | 1.84870000  | -3.41423000 | -3.18774100 |
| H | 1.36552900  | -2.46537800 | -2.92726700 |
| H | 2.72049700  | -3.19596300 | -3.81591700 |
| H | 1.13899800  | -4.00113500 | -3.78383700 |
| C | 3.05309000  | -5.45470500 | -2.31827900 |
| H | 2.45796800  | -6.10703800 | -2.96796300 |
| H | 3.96441200  | -5.18449000 | -2.86413800 |
| H | 3.34416600  | -6.03626300 | -1.43666100 |
| C | -0.48781600 | -3.50238000 | 2.33693600  |
| H | 0.36078200  | -2.83585400 | 2.52791900  |
| C | -0.51649500 | -4.55553500 | 3.45855500  |
| H | -0.61611000 | -4.06811500 | 4.43497400  |
| H | -1.36436300 | -5.23980900 | 3.33619500  |
| H | 0.39968200  | -5.15569800 | 3.47088800  |
| C | -1.76881800 | -2.65803600 | 2.37163100  |
| H | -2.65983700 | -3.27949900 | 2.22875700  |
| H | -1.86059600 | -2.14805300 | 3.33908700  |
| H | -1.77389900 | -1.89922500 | 1.58064600  |
| F | 0.01545200  | -0.16696300 | -0.71930100 |

|   |             |             |             |
|---|-------------|-------------|-------------|
| C | 1.13109800  | 1.58974500  | -3.43221200 |
| H | 2.16543600  | 1.89722400  | -3.24238800 |
| H | 0.80688300  | 0.97974500  | -2.58162700 |
| H | 1.11271900  | 0.95932100  | -4.33016500 |
| C | 4.53423200  | 2.90331600  | 2.58397000  |
| H | 4.69970600  | 3.94548500  | 2.28650000  |
| H | 4.22891400  | 2.90194000  | 3.63640800  |
| H | 5.49224900  | 2.37893400  | 2.50473400  |
| C | 0.44937500  | 0.08955600  | 2.28746100  |
| C | 1.15808200  | 0.06948200  | 3.48185100  |
| C | -0.74542200 | 0.75355300  | 2.39536000  |
| C | 0.73169700  | 0.66539700  | 4.66098800  |
| C | -1.25298700 | 1.37989000  | 3.52324700  |
| C | -0.48884100 | 1.33164600  | 4.67843800  |
| F | 2.39495300  | -0.56878700 | 3.52375100  |
| F | 1.48494900  | 0.61335500  | 5.80694500  |
| F | -0.93546700 | 1.93281100  | 5.82734200  |
| F | -2.45991100 | 2.04049300  | 3.51410100  |
| F | -1.61834200 | 0.84814000  | 1.24496600  |

**[Mg]-C<sub>6</sub>F<sub>5</sub>  
wB97X  
6,31G+(d,p) / Lanl2DZ**

Sum of electronic and zero-point Energies=  
-1966.403877

Sum of electronic and thermal Energies=  
-1966.358854

Sum of electronic and thermal Enthalpies=  
-1966.357910

Sum of electronic and thermal Free Energies=  
-1966.484591

Lowest energy vibrations = 19.44 22.59 30.20 cm<sup>-1</sup>

|     |             |             |             |
|-----|-------------|-------------|-------------|
| 0 1 |             |             |             |
| Mg  | -0.00010000 | -0.30547600 | -0.00024300 |
| N   | -1.47916100 | -1.65636700 | -0.06790900 |
| C   | -1.26931900 | -2.98136500 | -0.07101300 |
| C   | -0.00023700 | -3.58458500 | 0.00012400  |
| H   | -0.00028100 | -4.66760400 | 0.00024300  |
| C   | 1.26891400  | -2.98145900 | 0.07118800  |
| N   | 1.47890600  | -1.65649600 | 0.06776600  |
| C   | -2.46405700 | -3.90675300 | -0.15476200 |
| H   | -3.14081600 | -3.74633900 | 0.69160700  |
| H   | -2.15317700 | -4.95207600 | -0.16151400 |
| H   | -3.04323400 | -3.70554000 | -1.06270400 |
| C   | 2.46352500  | -3.90697600 | 0.15534400  |
| H   | 2.15254200  | -4.95227000 | 0.16186800  |
| H   | 3.04231200  | -3.70592200 | 1.06357500  |
| H   | 3.14068400  | -3.74654800 | -0.69069600 |
| C   | -2.82697600 | -1.14022500 | -0.12230500 |
| C   | -3.53128600 | -0.92002000 | 1.07946100  |
| C   | -4.79226000 | -0.32295700 | 1.01165700  |
| H   | -5.34649000 | -0.13436200 | 1.92578700  |
| C   | -5.34639600 | 0.04819600  | -0.21017500 |
| H   | -6.32286600 | 0.52066700  | -0.24270500 |
| C   | -4.64380600 | -0.18178600 | -1.38765600 |
| H   | -5.08143800 | 0.11319200  | -2.33705700 |
| C   | -3.37989400 | -0.78059800 | -1.36670100 |
| C   | -2.91141500 | -1.26799500 | 2.42895200  |
| H   | -2.14480200 | -2.03408400 | 2.26081800  |
| C   | -2.21299700 | -0.03813000 | 3.03888400  |
| H   | -1.43235700 | 0.35927500  | 2.37936800  |
| H   | -1.75314800 | -0.29159800 | 4.00112000  |
| H   | -2.93368200 | 0.77166000  | 3.19813100  |



|   |             |             |             |   |             |             |             |
|---|-------------|-------------|-------------|---|-------------|-------------|-------------|
| H | 0.58590800  | 3.33651800  | 2.52789200  | C | 3.12276200  | -3.89817800 | -2.23505200 |
| H | 1.79855700  | 3.07647500  | 1.25776600  | H | 2.53224800  | -4.60086600 | -2.81692200 |
| C | 1.08090300  | 0.95693800  | 3.93729800  | C | 2.74284500  | -2.55296400 | -2.19127600 |
| H | 0.85182100  | -0.10843800 | 4.05229000  | C | 5.48668500  | -1.17201200 | 0.15185700  |
| H | 0.22669900  | 1.52908100  | 4.31878600  | H | 5.08495600  | -0.15680500 | 0.04668800  |
| H | 1.95404500  | 1.18955300  | 4.55887800  | C | 5.37881700  | -1.56686200 | 1.63530400  |
| C | 0.49694700  | 1.45110600  | -1.07676100 | H | 4.34698900  | -1.44820600 | 1.98420900  |
| C | 1.77985000  | 1.63217000  | -1.56579800 | H | 6.02484500  | -0.92622300 | 2.24750100  |
| F | 2.61893700  | 0.51967100  | -1.71187500 | H | 5.69531000  | -2.60613300 | 1.78777600  |
| C | 2.31451400  | 2.85834800  | -1.93705500 | C | 6.95209600  | -1.14281800 | -0.31443600 |
| F | 3.59731400  | 2.97404100  | -2.41736500 | H | 7.42700900  | -2.12395600 | -0.19444800 |
| C | 1.51856700  | 3.98950100  | -1.82230700 | H | 7.52314500  | -0.42150900 | 0.28113600  |
| C | 0.21875700  | 3.87200000  | -1.35041000 | H | 7.03340100  | -0.85653400 | -1.36963100 |
| F | -0.57012900 | 4.99277800  | -1.24660000 | C | 1.47215500  | -2.11638300 | -2.91008400 |
| C | -0.25166300 | 2.61352600  | -0.99904600 | H | 1.44448300  | -1.02135500 | -2.90580900 |
| F | -1.56491800 | 2.54869200  | -0.53266800 | C | 1.42022400  | -2.58859400 | -4.37074700 |
| O | 0.11391900  | -1.73797000 | -1.84228000 | H | 2.30590000  | -2.26264500 | -4.92741000 |
| C | -0.07416200 | -3.19412300 | -1.71372800 | H | 0.53227700  | -2.18265500 | -4.86931500 |
| H | -0.90464200 | -3.35520700 | -1.02362800 | H | 1.36528600  | -3.68101300 | -4.44011300 |
| H | 0.84109600  | -3.62226200 | -1.29360300 | C | 0.24419700  | -2.61348900 | -2.12666300 |
| C | -0.32273500 | -3.65174300 | -3.14489400 | H | 0.23761000  | -3.70878500 | -2.06405500 |
| H | -1.37151200 | -3.48758600 | -3.41910700 | H | -0.69242800 | -2.29868600 | -2.60575700 |
| H | -0.09153700 | -4.71009700 | -3.28744900 | H | 0.28052400  | -2.22146800 | -1.10537900 |
| C | 0.60286100  | -2.72830900 | -3.95758000 | C | 1.91643500  | 3.07944700  | 1.20346800  |
| H | 1.62980300  | -3.10877400 | -3.93416500 | C | 0.57660500  | 3.42470100  | 1.47187800  |
| H | 0.29638500  | -2.64161200 | -5.00280000 | C | 0.28643200  | 4.20338900  | 2.59800200  |
| C | 0.51266300  | -1.38659000 | -3.22730000 | H | -0.74476600 | 4.47929700  | 2.80537800  |
| H | 1.45532400  | -0.84193800 | -3.16891400 | C | 1.29487800  | 4.62656400  | 3.45493500  |
| H | -0.26839500 | -0.73860000 | -3.62949900 | H | 1.05618800  | 5.22781200  | 4.32660200  |
| F | 2.01242800  | 5.21844000  | -2.18478600 | C | 2.61355500  | 4.26153500  | 3.19555000  |

**[Mg]-F-[Mg]-F  
wB97X  
6,31G+(d,p) / Lan12DZ**

Sum of electronic and zero-point Energies=  
-2677.763953

Sum of electronic and thermal Energies=  
-2677.691864

Sum of electronic and thermal Enthalpies=  
-2677.690920

Sum of electronic and thermal Free Energies=  
-2677.869091

Lowest energy vibrations = 26.34 31.65 38.25 cm<sup>-1</sup>

|     |            |             |             |
|-----|------------|-------------|-------------|
| 0 1 |            |             |             |
| Mg  | 2.01757300 | 0.22483700  | 0.34923800  |
| N   | 3.10956700 | -0.27036200 | -1.30107800 |
| C   | 3.50177900 | 0.63216300  | -2.20549800 |
| C   | 3.25402800 | 2.01809000  | -2.11450500 |
| H   | 3.60362400 | 2.60486200  | -2.95584000 |
| C   | 2.72770500 | 2.76491800  | -1.04063600 |
| N   | 2.23944300 | 2.23336200  | 0.08442900  |
| C   | 4.29193900 | 0.16635400  | -3.41267400 |
| H   | 5.20511400 | -0.34894000 | -3.09520500 |
| H   | 4.56865000 | 1.00595700  | -4.05189300 |
| H   | 3.71523600 | -0.55191300 | -4.00602500 |
| C   | 2.77984100 | 4.27383700  | -1.17952000 |
| H   | 3.04525800 | 4.56597700  | -2.19680200 |
| H   | 3.52401300 | 4.69568600  | -0.49350100 |
| H   | 1.81720000 | 4.72521500  | -0.91812300 |
| C   | 3.51349700 | -1.64851600 | -1.42766900 |
| C   | 4.64326000 | -2.10233100 | -0.71243300 |
| C   | 4.98602800 | -3.45710900 | -0.78410900 |
| H   | 5.85122100 | -3.81386800 | -0.23212100 |
| C   | 4.23901700 | -4.35332500 | -1.54024700 |
| H   | 4.52045000 | -5.40088700 | -1.58357700 |

|    |             |             |             |
|----|-------------|-------------|-------------|
| C  | 3.12276200  | -3.89817800 | -2.23505200 |
| H  | 2.53224800  | -4.60086600 | -2.81692200 |
| C  | 2.74284500  | -2.55296400 | -2.19127600 |
| C  | 5.48668500  | -1.17201200 | 0.15185700  |
| H  | 5.08495600  | -0.15680500 | 0.04668800  |
| C  | 5.37881700  | -1.56686200 | 1.63530400  |
| H  | 4.34698900  | -1.44820600 | 1.98420900  |
| H  | 6.02484500  | -0.92622300 | 2.24750100  |
| H  | 5.69531000  | -2.60613300 | 1.78777600  |
| C  | 6.95209600  | -1.14281800 | -0.31443600 |
| H  | 7.42700900  | -2.12395600 | -0.19444800 |
| H  | 7.52314500  | -0.42150900 | 0.28113600  |
| H  | 7.03340100  | -0.85653400 | -1.36963100 |
| C  | 1.47215500  | -2.11638300 | -2.91008400 |
| H  | 1.44448300  | -1.02135500 | -2.90580900 |
| C  | 1.42022400  | -2.58859400 | -4.37074700 |
| H  | 2.30590000  | -2.26264500 | -4.92741000 |
| H  | 0.53227700  | -2.18265500 | -4.86931500 |
| H  | 1.36528600  | -3.68101300 | -4.44011300 |
| C  | 0.24419700  | -2.61348900 | -2.12666300 |
| H  | 0.23761000  | -3.70878500 | -2.06405500 |
| H  | -0.69242800 | -2.29868600 | -2.60575700 |
| H  | 0.28052400  | -2.22146800 | -1.10537900 |
| C  | 1.91643500  | 3.07944700  | 1.20346800  |
| C  | 0.57660500  | 3.42470100  | 1.47187800  |
| C  | 0.28643200  | 4.20338900  | 2.59800200  |
| H  | -0.74476600 | 4.47929700  | 2.80537800  |
| C  | 1.29487800  | 4.62656400  | 3.45493500  |
| H  | 1.05618800  | 5.22781200  | 4.32660200  |
| C  | 2.61355500  | 4.26153500  | 3.19555000  |
| H  | 3.39640000  | 4.57430800  | 3.88010000  |
| C  | 2.94691200  | 3.48866300  | 2.08056600  |
| C  | -0.56067400 | 2.96030900  | 0.57329000  |
| H  | -0.11341800 | 2.36797500  | -0.23118600 |
| C  | -1.31870700 | 4.13621500  | -0.06194100 |
| H  | -1.78706000 | 4.76484500  | 0.70495600  |
| H  | -2.10655400 | 3.77686700  | -0.73482100 |
| H  | -0.63898100 | 4.76962800  | -0.64253800 |
| C  | -1.53058200 | 2.05039300  | 1.35024200  |
| H  | -0.99502800 | 1.21084500  | 1.81554100  |
| H  | -2.34404900 | 1.70967600  | 0.68365400  |
| H  | -2.02928900 | 2.59035200  | 2.16363300  |
| C  | 4.38511500  | 3.02938500  | 1.87509100  |
| H  | 4.49097300  | 2.69350900  | 0.83733600  |
| C  | 4.67281200  | 1.81768600  | 2.78154700  |
| H  | 4.60414700  | 2.10877700  | 3.83745600  |
| H  | 5.68549600  | 1.43677500  | 2.59916700  |
| H  | 3.95473800  | 1.00690400  | 2.60756200  |
| C  | 5.41158700  | 4.14812900  | 2.10611900  |
| H  | 5.18942100  | 5.03248800  | 1.49729900  |
| H  | 6.41495600  | 3.79451500  | 1.84415700  |
| H  | 5.43984900  | 4.45965600  | 3.15667400  |
| F  | 0.17893100  | -0.11573000 | -0.00521000 |
| Mg | -1.61213300 | -0.41031000 | -0.09747500 |
| N  | -2.42442900 | -1.99543100 | 0.80296600  |
| N  | -3.01479000 | -0.07910500 | -1.49551000 |
| C  | -3.26588200 | -2.74702600 | 0.08648900  |
| C  | -2.05940400 | -2.36118100 | 2.15540900  |
| C  | -3.75878400 | -1.14755800 | -1.85717200 |
| C  | -3.37360300 | 1.23806500  | -1.97870200 |
| C  | -3.77716000 | -2.38132300 | -1.18328900 |
| C  | -3.72929900 | -4.08214800 | 0.62769300  |
| C  | -1.02980500 | -3.29236700 | 2.40629100  |
| C  | -2.72063300 | -1.70799000 | 3.22268400  |
| C  | -4.65189100 | -1.07726300 | -3.08333100 |
| C  | -2.67758300 | 1.88021900  | -3.03077800 |
| C  | -4.44902900 | 1.89946900  | -1.32975600 |
| H  | -4.39344300 | -3.13945800 | -1.65340100 |
| H  | -2.95939500 | -4.84090800 | 0.44997200  |

|   |             |             |             |
|---|-------------|-------------|-------------|
| H | -4.64710500 | -4.40599700 | 0.13465300  |
| H | -3.89783500 | -4.03959300 | 1.70654800  |
| C | -0.71434000 | -3.59399500 | 3.73631400  |
| C | -0.21380000 | -3.94320200 | 1.29708900  |
| C | -2.37362900 | -2.04729200 | 4.53309300  |
| C | -3.80351800 | -0.66426700 | 2.96147000  |
| H | -4.86045100 | -0.05205800 | -3.39088300 |
| H | -4.15092100 | -1.58200500 | -3.91741200 |
| H | -5.59752900 | -1.59425400 | -2.90472100 |
| C | -3.09533700 | 3.16255700  | -3.41548700 |
| C | -1.47957900 | 1.31541100  | -3.79632600 |
| C | -4.82965800 | 3.17400300  | -1.76235800 |
| C | -5.22943300 | 1.25914800  | -0.18242000 |
| H | 0.08202200  | -4.30315400 | 3.94153400  |
| C | -1.38368200 | -2.99076400 | 4.79243100  |
| H | -0.62143000 | -3.60409500 | 0.33800800  |
| C | 1.26383500  | -3.50964900 | 1.37578600  |
| C | -0.30267600 | -5.47964800 | 1.33109300  |
| H | -2.87242500 | -1.56105400 | 5.36449800  |
| H | -3.54778900 | -0.15047500 | 2.02427500  |
| C | -3.88381700 | 0.40761800  | 4.05819400  |
| H | -2.56701800 | 3.65732600  | -4.22568700 |
| C | -4.16132100 | 3.80817800  | -2.80154500 |
| H | -1.32417500 | 2.01894000  | -4.62629400 |
| C | -1.70679300 | -0.05543000 | -4.44706200 |
| C | -0.18271700 | 1.34633000  | -2.97288400 |
| H | -5.66265700 | 3.67507600  | -1.27869800 |
| H | -4.66666400 | 0.38612700  | 0.16755200  |
| C | -6.60909900 | 0.76172900  | -0.65124400 |
| C | -5.40004800 | 2.21697700  | 1.00903700  |
| H | -1.12288500 | -3.23723300 | 5.81653000  |
| H | 1.39099000  | -2.43194600 | 1.52783200  |
| H | 1.80185300  | -3.80836800 | 0.46658400  |
| H | 1.75699700  | -3.99975700 | 2.22489300  |
| H | 0.15517700  | -5.87476000 | 2.24530200  |
| H | 0.24040000  | -5.90480800 | 0.47939200  |
| H | -1.33644400 | -5.84025500 | 1.29677000  |
| H | -4.29347800 | 0.00196000  | 4.99018000  |
| H | -4.54568400 | 1.22006700  | 3.73901100  |
| H | -2.89747000 | 0.83145000  | 4.27545000  |
| H | -4.46571400 | 4.79662300  | -3.12992700 |
| H | -2.61427000 | -0.05568800 | -5.06058800 |
| H | -0.85866300 | -0.29736300 | -5.09839000 |
| H | -1.79212600 | -0.84701200 | -3.69865100 |
| H | -0.17243500 | 0.60642300  | -2.16648900 |
| H | 0.68245100  | 1.13307000  | -3.61148000 |
| H | -0.02068500 | 2.33444400  | -2.52753700 |
| H | -7.14401000 | 0.28489100  | 0.17837600  |
| H | -7.21751600 | 1.59939600  | -1.01300200 |
| H | -6.52238000 | 0.03325700  | -1.46257000 |
| H | -6.04147000 | 3.06767300  | 0.75345400  |
| H | -5.87485400 | 1.69232200  | 1.84610500  |
| H | -4.43823600 | 2.61325500  | 1.35221100  |
| F | 2.36229500  | -0.49446900 | 1.98021000  |
| C | -5.17960200 | -1.32307800 | 2.75387000  |
| H | -5.45663000 | -1.90832800 | 3.63882500  |
| H | -5.95348100 | -0.56202400 | 2.59364100  |
| H | -5.18054000 | -1.99128800 | 1.88631000  |

**[Mg]-F/F-[Mg]  
wB97X  
6,31G+(d,p) / Lanl2DZ**

Sum of electronic and zero-point Energies=  
-2677.801366  
Sum of electronic and thermal Energies=  
-2677.729565

Sum of electronic and thermal Enthalpies=  
-2677.728621  
Sum of electronic and thermal Free Energies=  
-2677.905951

Lowest energy vibrations = 19.83 29.43 35.25 cm<sup>-1</sup>

|     |             |            |             |
|-----|-------------|------------|-------------|
| 0 1 |             |            |             |
| Mg  | 0.03764900  | 1.46351800 | -0.45494000 |
| F   | 0.04381500  | 0.42089600 | 1.18471600  |
| N   | 1.55286500  | 2.82212000 | -0.76816400 |
| C   | 1.37909500  | 3.91971700 | -1.52316500 |
| C   | 0.15824800  | 4.31531300 | -2.09663600 |
| H   | 0.20843500  | 5.18642700 | -2.73742800 |
| C   | 2.54413400  | 4.86418800 | -1.75829100 |
| H   | 2.89400500  | 5.28285000 | -0.80830100 |
| H   | 2.24644100  | 5.68668600 | -2.40958800 |
| H   | 3.39939800  | 4.35224200 | -2.20874100 |
| C   | 2.84843300  | 2.67615100 | -0.14167300 |
| C   | 3.03854200  | 3.15394400 | 1.17035000  |
| C   | 4.31956200  | 3.08047800 | 1.73161800  |
| H   | 4.48180900  | 3.45582400 | 2.73854300  |
| C   | 5.38288200  | 2.53317800 | 1.02409500  |
| H   | 6.37004900  | 2.48408300 | 1.47339400  |
| C   | 5.17627500  | 2.04029300 | -0.26331300 |
| H   | 6.01111800  | 1.61098500 | -0.80719600 |
| C   | 3.91928200  | 2.11253100 | -0.87117200 |
| C   | 1.90067400  | 3.75071100 | 1.99207200  |
| H   | 1.00254500  | 3.76738900 | 1.36234200  |
| C   | 1.59853800  | 2.87465800 | 3.22067900  |
| H   | 1.25225400  | 1.88190000 | 2.91345000  |
| H   | 0.81858400  | 3.33384500 | 3.83833200  |
| H   | 2.49296100  | 2.75287100 | 3.84376800  |
| C   | 2.19717000  | 5.20075400 | 2.40967900  |
| H   | 3.06057400  | 5.25233700 | 3.08336600  |
| H   | 1.33573400  | 5.62659500 | 2.93741200  |
| H   | 2.40985700  | 5.83215600 | 1.53970800  |
| C   | 3.70873700  | 1.59858600 | -2.29185700 |
| H   | 2.93651000  | 2.21731800 | -2.76404100 |
| C   | 4.96954800  | 1.69387700 | -3.16316300 |
| H   | 4.71728900  | 1.46853500 | -4.20487000 |
| H   | 5.72953700  | 0.96897500 | -2.84892700 |
| H   | 5.41545900  | 2.69446100 | -3.12690900 |
| N   | -1.41856400 | 2.78382400 | -1.05225900 |
| C   | -1.13541000 | 3.85128300 | -1.81725100 |
| C   | -2.27182400 | 4.68348800 | -2.37772900 |
| H   | -2.81817600 | 5.18291100 | -1.56943600 |
| H   | -1.89407100 | 5.44586900 | -3.06030600 |
| H   | -2.99547600 | 4.06006700 | -2.91098300 |
| C   | -2.79756600 | 2.59842600 | -0.66298400 |
| C   | -3.27819000 | 3.25920600 | 0.48960100  |
| C   | -4.59579800 | 3.02358800 | 0.89380100  |
| H   | -4.98002700 | 3.51882900 | 1.78121600  |
| C   | -5.42404800 | 2.16231200 | 0.17847000  |
| H   | -6.44071200 | 1.98027600 | 0.51395200  |
| C   | -4.95289300 | 1.55808300 | -0.98240200 |
| H   | -5.61021400 | 0.90912000 | -1.55408400 |
| C   | -3.64983200 | 1.78671700 | -1.43796200 |
| C   | -2.40109000 | 4.23143100 | 1.27374500  |
| H   | -1.54085800 | 4.48975300 | 0.64543500  |
| C   | -1.85093100 | 3.58797100 | 2.55667900  |
| H   | -1.24895000 | 2.69917600 | 2.33599800  |
| H   | -1.22076700 | 4.30269300 | 3.10048300  |
| H   | -2.66990200 | 3.28233500 | 3.21920800  |
| C   | -3.13631100 | 5.54078500 | 1.60365600  |
| H   | -3.94545900 | 5.37913400 | 2.32505000  |
| H   | -2.43945900 | 6.26061500 | 2.04735300  |
| H   | -3.57149300 | 5.99377300 | 0.70584600  |



|    |             |             |             |
|----|-------------|-------------|-------------|
| C  | -3.19916300 | 1.20874400  | -2.77386000 |
| H  | -2.24374200 | 1.67858900  | -3.03342100 |
| C  | -4.19810100 | 1.52671700  | -3.89978800 |
| H  | -3.79607000 | 1.19221700  | -4.86263800 |
| H  | -5.15268600 | 1.01150300  | -3.74268600 |
| H  | -4.40524400 | 2.60069900  | -3.96949500 |
| C  | -2.96121400 | -0.30232500 | -2.68050200 |
| H  | -3.87691600 | -0.82422400 | -2.38211800 |
| H  | -2.63739200 | -0.69984700 | -3.65004200 |
| H  | -2.18232600 | -0.53041900 | -1.94701600 |
| Mg | 0.03196300  | -1.40991400 | 0.50247600  |
| N  | 1.52285200  | -2.80378300 | 0.77976600  |
| C  | 1.34963400  | -3.87422600 | 1.57311700  |
| C  | 0.13114200  | -4.23418100 | 2.17679100  |
| H  | 0.17775400  | -5.08338300 | 2.84658400  |
| C  | 2.50526400  | -4.82849400 | 1.82472300  |
| H  | 2.89990400  | -5.21706700 | 0.88048200  |
| H  | 2.17887700  | -5.67047800 | 2.43638800  |
| H  | 3.33808200  | -4.33326300 | 2.33247600  |
| C  | 2.79816400  | -2.70305100 | 0.10761900  |
| C  | 2.90617300  | -3.16174400 | -1.22261200 |
| C  | 4.16955700  | -3.16518000 | -1.82503400 |
| H  | 4.27865100  | -3.53028100 | -2.84103800 |
| C  | 5.28842800  | -2.69221300 | -1.14728300 |
| H  | 6.26086800  | -2.70179600 | -1.63004300 |
| C  | 5.15671700  | -2.19095200 | 0.14553500  |
| H  | 6.03285900  | -1.80857300 | 0.65841400  |
| C  | 3.91941500  | -2.19514500 | 0.79787900  |
| C  | 1.68175600  | -3.65985400 | -1.98679800 |
| H  | 0.81358300  | -3.10837000 | -1.60409400 |
| C  | 1.76572600  | -3.37852000 | -3.49374700 |
| H  | 2.00589500  | -2.32801800 | -3.68718600 |
| H  | 0.80314500  | -3.59987700 | -3.96697000 |
| H  | 2.52214700  | -4.00357200 | -3.98283300 |
| C  | 1.42281400  | -5.15710800 | -1.73815300 |
| H  | 2.29762900  | -5.75091100 | -2.03101000 |
| H  | 0.56585300  | -5.50016700 | -2.33121900 |
| H  | 1.20231000  | -5.36059100 | -0.68526100 |
| C  | 3.77873800  | -1.65228400 | 2.21664000  |
| H  | 3.02521900  | -2.25288600 | 2.73885600  |
| C  | 3.26803900  | -0.20501200 | 2.18376700  |
| H  | 3.95728100  | 0.42371700  | 1.61395300  |
| H  | 3.19291900  | 0.20211700  | 3.19933500  |
| H  | 2.27771200  | -0.12643900 | 1.72472900  |
| N  | -1.43186100 | -2.71600300 | 1.09782800  |
| C  | -1.15999500 | -3.76861200 | 1.88643900  |
| C  | -2.30363600 | -4.57852200 | 2.46450200  |
| H  | -2.87546500 | -5.06433000 | 1.66655500  |
| H  | -1.93032100 | -5.34921100 | 3.14016700  |
| H  | -3.00392100 | -3.94026200 | 3.01183900  |
| C  | -2.79916200 | -2.54535100 | 0.66611500  |
| C  | -3.22887500 | -3.19535100 | -0.51139400 |
| C  | -4.54185900 | -2.98860300 | -0.94731700 |
| H  | -4.88658300 | -3.48219600 | -1.85251100 |
| C  | -5.41078900 | -2.15944700 | -0.24419100 |
| H  | -6.42324700 | -2.00042800 | -0.60328900 |
| C  | -4.98356200 | -1.55152600 | 0.93276800  |
| H  | -5.67033200 | -0.92042100 | 1.48936800  |
| C  | -3.68843400 | -1.75266800 | 1.42059600  |
| C  | -2.31723900 | -4.13747500 | -1.29414900 |
| H  | -1.37807600 | -4.23924800 | -0.73806700 |
| C  | -1.97365900 | -3.57604700 | -2.68377600 |
| H  | -1.41722700 | -2.63577900 | -2.60795100 |
| H  | -1.36210200 | -4.29461600 | -3.24326000 |
| H  | -2.88329300 | -3.38320600 | -3.26555900 |
| C  | -2.93441900 | -5.54100000 | -1.42393900 |
| H  | -3.85142500 | -5.51898400 | -2.02442200 |
| H  | -2.22864200 | -6.22043800 | -1.91583000 |
| H  | -3.18541500 | -5.96257600 | -0.44442600 |

|   |             |             |             |
|---|-------------|-------------|-------------|
| C | -3.27297400 | -1.15404400 | 2.75899400  |
| H | -2.33871500 | -1.63933300 | 3.06335900  |
| C | -4.31549300 | -1.41524900 | 3.85873900  |
| H | -3.93268600 | -1.07176500 | 4.82621500  |
| H | -5.24805800 | -0.87401700 | 3.66227300  |
| H | -4.55834800 | -2.48061500 | 3.94442200  |
| C | -2.99085600 | 0.34780400  | 2.63363700  |
| H | -3.88481000 | 0.88434500  | 2.29833200  |
| H | -2.67926700 | 0.76202500  | 3.60021500  |
| H | -2.18797800 | 0.53840200  | 1.91527800  |
| F | 0.00746600  | -0.36512700 | -1.12788500 |
| C | 3.19471600  | 0.15122800  | -2.26789100 |
| H | 3.90136200  | -0.48823900 | -1.73112000 |
| H | 2.21718500  | 0.06387300  | -1.78307400 |
| H | 3.09206000  | -0.23545400 | -3.28964900 |
| C | 5.07669200  | -1.73381700 | 3.03190700  |
| H | 5.82517100  | -1.02219600 | 2.66380900  |
| H | 4.87320800  | -1.47925500 | 4.07745900  |
| H | 5.51506900  | -2.73802500 | 3.00246900  |

**[Mg]-F/F-[Mg] (THF)2  
wB97X  
6,31G+(d,p) / Lanl2DZ**

Sum of electronic and zero-point Energies=  
-3142.276054

Sum of electronic and thermal Energies=  
-3142.192819

Sum of electronic and thermal Enthalpies=  
-3142.191875

Sum of electronic and thermal Free Energies=  
-3142.390599

lowest energy vibrations 22.36 43.79 50.99

0 1

|    |            |             |             |
|----|------------|-------------|-------------|
| Mg | 1.32337000 | 0.48743600  | -0.69911200 |
| F  | 0.46985600 | -1.09792700 | 0.10018000  |
| N  | 3.27652800 | -0.35484200 | -0.82222700 |
| C  | 4.22305900 | 0.24136000  | -1.55852200 |
| C  | 4.18903400 | 1.59231000  | -1.95343500 |
| H  | 5.01005100 | 1.91590400  | -2.58180800 |
| C  | 5.44299800 | -0.54300000 | -2.01327700 |
| H  | 5.94626000 | -1.02558800 | -1.17054200 |
| H  | 6.15644700 | 0.10966100  | -2.51913100 |
| H  | 5.15215200 | -1.34083900 | -2.70537200 |
| C  | 3.58688000 | -1.67118200 | -0.31705300 |
| C  | 4.16252800 | -1.78730900 | 0.96831400  |
| C  | 4.54438400 | -3.05272600 | 1.42544100  |
| H  | 5.00427500 | -3.15460200 | 2.40372100  |
| C  | 4.33513200 | -4.18999600 | 0.65051200  |
| H  | 4.63514800 | -5.16552900 | 1.02151900  |
| C  | 3.72786000 | -4.07024100 | -0.59497000 |
| H  | 3.54661300 | -4.96087900 | -1.19004300 |
| C  | 3.35978300 | -2.81985900 | -1.10203100 |
| C  | 4.39183700 | -0.55289000 | 1.83436500  |
| H  | 3.61995800 | 0.17529900  | 1.55430600  |
| C  | 4.25625700 | -0.84189400 | 3.33733800  |
| H  | 3.34820900 | -1.41466300 | 3.55767700  |
| H  | 4.22108300 | 0.10205500  | 3.89582300  |
| H  | 5.11283100 | -1.41094400 | 3.71747000  |
| C  | 5.75963600 | 0.09977000  | 1.55738300  |
| H  | 6.56296500 | -0.64017500 | 1.66195500  |
| H  | 5.94873100 | 0.90907500  | 2.27280900  |
| H  | 5.80725700 | 0.52831400  | 0.55174900  |
| C  | 2.71153000 | -2.71863700 | -2.47476300 |
| H  | 2.75128000 | -1.66584500 | -2.77173400 |
| C  | 3.43839900 | -3.54311600 | -3.54852600 |
| H  | 2.99724200 | -3.35029900 | -4.53382200 |

|    |             |             |             |   |             |             |             |
|----|-------------|-------------|-------------|---|-------------|-------------|-------------|
| H  | 3.34641600  | -4.61813500 | -3.35587700 | H | -4.74686100 | -3.37972400 | -0.63972900 |
| H  | 4.50653000  | -3.30200200 | -3.59756400 | C | -0.20885300 | -3.89696100 | 2.32908300  |
| C  | 1.23179600  | -3.11985200 | -2.39039000 | H | -0.84500300 | -3.05941400 | 2.63715200  |
| H  | 1.13277700  | -4.18540900 | -2.15581800 | C | -0.33064600 | -5.01046100 | 3.38292900  |
| H  | 0.72831500  | -2.93892100 | -3.35138100 | H | -0.07608200 | -4.61981500 | 4.37588400  |
| H  | 0.72729900  | -2.55739400 | -1.59804800 | H | 0.36145700  | -5.83292500 | 3.16801000  |
| N  | 2.23287900  | 2.41119900  | -0.76196800 | H | -1.34139900 | -5.43034700 | 3.43008700  |
| C  | 3.33705300  | 2.61404000  | -1.49479600 | C | 1.23801400  | -3.38744700 | 2.25717400  |
| C  | 3.74480600  | 4.02518100  | -1.88671300 | H | 1.92120200  | -4.19820700 | 1.98150500  |
| H  | 3.79246500  | 4.68788900  | -1.01819600 | H | 1.56302100  | -2.99727800 | 3.23267600  |
| H  | 4.71934400  | 4.02313900  | -2.37767500 | H | 1.32652100  | -2.60219700 | 1.49975500  |
| H  | 3.01206700  | 4.45985400  | -2.57455500 | N | -3.27681600 | 0.35461600  | 0.82180100  |
| C  | 1.60848200  | 3.58685500  | -0.20329600 | C | -4.22320700 | -0.24161500 | 1.55827300  |
| C  | 1.98597200  | 4.00119200  | 1.09486300  | C | -5.44343000 | 0.54252200  | 2.01265300  |
| C  | 1.45795700  | 5.19111100  | 1.60520100  | H | -5.94713000 | 1.02411000  | 1.16959900  |
| H  | 1.75407900  | 5.52903000  | 2.59393500  | H | -6.15643700 | -0.11006700 | 2.51921700  |
| C  | 0.54784000  | 5.94631000  | 0.87034800  | H | -5.15286800 | 1.34112400  | 2.70396400  |
| H  | 0.14540700  | 6.86737100  | 1.28123200  | C | -3.58748200 | 1.67082500  | 0.31646500  |
| C  | 0.14630400  | 5.50485300  | -0.38562800 | C | -4.16316200 | 1.78674400  | -0.96891900 |
| H  | -0.58171500 | 6.08249800  | -0.94889700 | C | -4.54536000 | 3.05205300  | -1.42606700 |
| C  | 0.67316900  | 4.33580800  | -0.94572800 | H | -5.00529100 | 3.15379400  | -2.40433800 |
| C  | 2.97414800  | 3.18215900  | 1.91933300  | C | -4.33643200 | 4.18940300  | -0.65117000 |
| H  | 2.87600100  | 2.14167600  | 1.58435600  | H | -4.63673900 | 5.16483700  | -1.02220000 |
| C  | 2.68034800  | 3.23247500  | 3.42690500  | C | -3.72898900 | 4.06987400  | 0.59424300  |
| H  | 1.61810500  | 3.06542900  | 3.63703900  | H | -3.54787000 | 4.96059400  | 1.18923300  |
| H  | 3.26431300  | 2.46351900  | 3.94823200  | C | -3.36055200 | 2.81961100  | 1.10132500  |
| H  | 2.95946400  | 4.20069300  | 3.85911500  | C | -4.39196200 | 0.55224200  | -1.83500600 |
| C  | 4.43248100  | 3.60683600  | 1.66300900  | H | -3.61990500 | -0.17570200 | -1.55479400 |
| H  | 4.55186600  | 4.68415200  | 1.83276200  | C | -4.25613300 | 0.84124000  | -3.33795600 |
| H  | 5.10919100  | 3.07863000  | 2.34538500  | H | -3.34809500 | 1.41408900  | -3.55814400 |
| H  | 4.74705900  | 3.37710000  | 0.64051800  | H | -4.22076200 | -0.10271200 | -3.89641900 |
| C  | 0.20932300  | 3.89750700  | -2.32840900 | H | -5.11270200 | 1.41019400  | -3.71824400 |
| H  | 0.84579200  | 3.06038700  | -2.63698200 | C | -5.75960900 | -0.10088700 | -1.55840500 |
| C  | 0.32993000  | 5.01136100  | -3.38202400 | H | -6.56314100 | 0.63883400  | -1.66301000 |
| H  | 0.07499000  | 4.62086000  | -4.37494100 | H | -5.94828000 | -0.91008800 | -2.27406100 |
| H  | -0.36247800 | 5.83340300  | -3.16647400 | H | -5.80731100 | -0.52968000 | -0.55288800 |
| H  | 1.34042300  | 5.43180300  | -3.42967700 | C | -2.71192400 | 2.71865300  | 2.47388500  |
| C  | -1.23723400 | 3.38715700  | -2.25601000 | H | -2.75124700 | 1.66585100  | 2.77089000  |
| H  | -1.92072300 | 4.19748900  | -1.97984800 | C | -3.43870700 | 3.54300500  | 3.54781200  |
| H  | -1.56241800 | 2.99713200  | -3.23150900 | H | -2.99705100 | 3.35052800  | 4.53295200  |
| H  | -1.32506400 | 2.60159300  | -1.49880700 | H | -3.34724600 | 4.61802500  | 3.35493100  |
| O  | 0.69684000  | 0.24821900  | -2.63578800 | H | -4.50671900 | 3.30148600  | 3.59738200  |
| Mg | -1.32345000 | -0.48728700 | 0.69903700  | C | -1.23236100 | 3.12034400  | 2.38905500  |
| N  | -2.23256500 | -2.41113700 | 0.76237100  | H | -1.13373900 | 4.18590400  | 2.15434200  |
| C  | -3.33663200 | -2.61410000 | 1.49531700  | H | -0.72850500 | 2.93967500  | 3.34990300  |
| C  | -4.18885100 | -1.59243300 | 1.95364200  | H | -0.72793500 | 2.55792900  | 1.59663100  |
| H  | -5.00976700 | -1.91600900 | 2.58215200  | F | -0.46999200 | 1.09828000  | -0.10026800 |
| C  | -3.74379400 | -4.02522900 | 1.88792000  | C | 1.40140900  | 0.56116300  | -3.88724000 |
| H  | -3.79098300 | -4.68847700 | 1.01979400  | C | -0.69501300 | -0.16593700 | -2.91365500 |
| H  | -4.71840600 | -4.02337900 | 2.37873500  | C | 0.28016100  | 0.79385600  | -4.89331300 |
| H  | -3.01094000 | -4.45913400 | 2.57615000  | H | 2.04174800  | 1.42360000  | -3.69699800 |
| C  | -1.60786600 | -3.58671200 | 0.20384600  | H | 2.02430600  | -0.29881800 | -4.15769800 |
| C  | -1.98537400 | -4.00134300 | -1.09421200 | C | -0.79038200 | -0.21320700 | -4.43856800 |
| C  | -1.45698300 | -5.19111300 | -1.60450500 | H | -0.84821400 | -1.13454900 | -2.43226900 |
| H  | -1.75313700 | -5.52925200 | -2.59315700 | H | -1.34801500 | 0.58652300  | -2.46601000 |
| C  | -0.54651500 | -5.94591200 | -0.86967900 | H | 0.60668000  | 0.62760900  | -5.92294500 |
| H  | -0.14378400 | -6.86686500 | -1.28051000 | H | -0.09821300 | 1.81959300  | -4.81084600 |
| C  | -0.14513100 | -5.50427000 | 0.38628500  | H | -0.54766000 | -1.21613700 | -4.80888500 |
| H  | 0.58308200  | -6.08165500 | 0.94956800  | H | -1.79240100 | 0.04436100  | -4.79089000 |
| C  | -0.67236100 | -4.33536300 | 0.94633100  | O | -0.69680800 | -0.24765800 | 2.63560300  |
| C  | -2.97419800 | -3.18292500 | -1.91851400 | C | -1.40147300 | -0.56005500 | 3.88710700  |
| H  | -2.87700400 | -2.14246500 | -1.58319700 | C | 0.69475000  | 0.16744400  | 2.91348300  |
| C  | -2.68026100 | -3.23252800 | -3.42607700 | C | -0.28026800 | -0.79263600 | 4.89322900  |
| H  | -1.61815500 | -3.06441600 | -3.63604500 | H | -2.02418700 | 0.30014100  | 4.15735500  |
| H  | -3.26492100 | -2.46398000 | -3.94723200 | H | -2.04200800 | -1.42239000 | 3.69706300  |
| H  | -2.95841100 | -4.20088200 | -3.85859800 | C | 0.79024700  | 0.21445700  | 4.43843100  |
| C  | -4.43213300 | -3.60901200 | -1.66228100 | H | 1.34821300  | -0.58447400 | 2.46558400  |
| H  | -4.55053200 | -4.68641200 | -1.83219100 | H | 0.84728400  | 1.13627000  | 2.43233200  |
| H  | -5.10935700 | -3.08132400 | -2.34454100 | H | 0.09812800  | -1.81836600 | 4.81086700  |

|   |             |             |            |
|---|-------------|-------------|------------|
| H | -0.60681100 | -0.62628800 | 5.92283700 |
| H | 1.79228600  | -0.04323800 | 4.79060600 |
| H | 0.54765200  | 1.21734700  | 4.80892900 |

**[Mg]-C<sub>6</sub>F<sub>5</sub>/C<sub>6</sub>F<sub>5</sub>-[Mg]  
wB97X  
6,31G+(d,p) / Lanl2DZ**

Sum of electronic and zero-point Energies=  
-3932.854015

Sum of electronic and thermal Energies=  
-3932.765258

Sum of electronic and thermal Enthalpies=  
-3932.764314

Sum of electronic and thermal Free Energies=  
-3932.978281

Lowest energy vibrations = 15.33 24.99 28.09 cm<sup>-1</sup>

0 1

|    |             |             |             |
|----|-------------|-------------|-------------|
| Mg | -2.49868700 | -0.19716300 | 0.45671000  |
| N  | -3.43379000 | -1.40948700 | 1.80416600  |
| C  | -4.75866600 | -1.57434800 | 1.75301800  |
| C  | -5.61022700 | -0.96442100 | 0.80583400  |
| H  | -6.66199200 | -1.17527600 | 0.96274100  |
| C  | -5.47681200 | -2.47309200 | 2.74451000  |
| H  | -4.83062400 | -2.81784100 | 3.55166400  |
| H  | -5.87119800 | -3.34962000 | 2.21877500  |
| H  | -6.33161900 | -1.94500200 | 3.17714000  |
| C  | -2.66218800 | -2.03316100 | 2.85752600  |
| C  | -2.09412000 | -3.31025000 | 2.65749600  |
| C  | -1.35917100 | -3.89105800 | 3.69720000  |
| H  | -0.92848400 | -4.87806900 | 3.55688000  |
| C  | -1.17325200 | -3.23180400 | 4.90637700  |
| H  | -0.60432000 | -3.70035400 | 5.70309200  |
| C  | -1.71807200 | -1.96517600 | 5.08576700  |
| H  | -1.56727600 | -1.44784400 | 6.02867000  |
| C  | -2.46101700 | -1.34415400 | 4.07632400  |
| C  | -2.27846400 | -4.08597800 | 1.35977100  |
| H  | -2.69865500 | -3.40275200 | 0.61462300  |
| C  | -0.93908500 | -4.60767600 | 0.81659200  |
| H  | -0.21309200 | -3.79361500 | 0.71881000  |
| H  | -1.08372600 | -5.07185100 | -0.16469700 |
| H  | -0.50210600 | -5.36335700 | 1.47902100  |
| C  | -3.26487600 | -5.25313800 | 1.54079600  |
| H  | -2.87610900 | -5.97752100 | 2.26696400  |
| H  | -3.41969100 | -5.77347400 | 0.58896700  |
| H  | -4.23712700 | -4.90517600 | 1.90341400  |
| C  | -3.05370200 | 0.03504700  | 4.33539400  |
| H  | -3.35701400 | 0.45796800  | 3.37344200  |
| C  | -4.31023000 | -0.05045800 | 5.22119000  |
| H  | -4.72271500 | 0.94978900  | 5.39495800  |
| H  | -4.06485900 | -0.49348900 | 6.19415900  |
| H  | -5.08962500 | -0.66342200 | 4.75854700  |
| N  | -4.11702600 | 0.23234900  | -0.72925700 |
| C  | -5.34120500 | -0.14373600 | -0.30109400 |
| C  | -6.56952500 | 0.36477900  | -1.03512300 |
| H  | -6.45607500 | 0.30953700  | -2.11966100 |
| H  | -7.45663200 | -0.19954700 | -0.74394900 |
| H  | -6.73815300 | 1.41733400  | -0.78241000 |
| C  | -4.04440500 | 0.99477400  | -1.96158500 |
| C  | -3.84522000 | 0.30294500  | -3.18250300 |
| C  | -3.80078700 | 1.03483800  | -4.37311500 |
| H  | -3.65228300 | 0.51698600  | -5.31431700 |
| C  | -3.93111900 | 2.42050200  | -4.37612600 |
| H  | -3.89272600 | 2.97008100  | -5.31145800 |
| C  | -4.10750300 | 3.09193400  | -3.17352400 |
| H  | -4.20536400 | 4.17422700  | -3.17307500 |
| C  | -4.17325900 | 2.40137000  | -1.95652700 |

|    |             |             |             |
|----|-------------|-------------|-------------|
| C  | -3.67362900 | -1.21276800 | -3.21272700 |
| H  | -3.15135200 | -1.49171900 | -2.29105400 |
| C  | -2.83572900 | -1.70053900 | -4.40499400 |
| H  | -1.88477600 | -1.16048200 | -4.48825100 |
| H  | -2.62068300 | -2.76857700 | -4.29547200 |
| H  | -3.37615400 | -1.58038800 | -5.35086600 |
| C  | -5.01835000 | -1.96486200 | -3.20815200 |
| H  | -5.64346100 | -1.63819200 | -4.04831300 |
| H  | -4.84132800 | -3.04127600 | -3.31131800 |
| H  | -5.57298300 | -1.81011500 | -2.27932100 |
| C  | -4.35418000 | 3.20819000  | -0.67783500 |
| H  | -4.45058500 | 2.50657100  | 0.15470500  |
| C  | -5.61545700 | 4.08880600  | -0.71197800 |
| H  | -5.75258300 | 4.58538300  | 0.25485000  |
| H  | -5.53412500 | 4.86868500  | -1.47831000 |
| H  | -6.51749600 | 3.50670100  | -0.92754100 |
| C  | -3.11787000 | 4.08700400  | -0.41252100 |
| H  | -3.02716500 | 4.86857600  | -1.17785100 |
| H  | -3.19710700 | 4.57637900  | 0.56487300  |
| H  | -2.19391800 | 3.49850000  | -0.43039300 |
| Mg | 2.35052600  | -0.06944500 | -0.63138300 |
| N  | 4.20597200  | -0.81760800 | -0.24934800 |
| C  | 5.16975100  | -0.50260100 | -1.12473900 |
| C  | 5.05932400  | 0.51624000  | -2.09790700 |
| H  | 5.85942900  | 0.54728800  | -2.82801300 |
| C  | 6.47030300  | -1.27996900 | -1.12227800 |
| H  | 6.82821500  | -1.46404900 | -0.10597700 |
| H  | 7.24300900  | -0.74602200 | -1.67749900 |
| H  | 6.32090300  | -2.25639500 | -1.59727600 |
| C  | 4.48301300  | -1.72731200 | 0.83596400  |
| C  | 4.82550700  | -1.17766700 | 2.09538200  |
| C  | 5.08357600  | -2.04700700 | 3.15840700  |
| H  | 5.35036200  | -1.64046800 | 4.12833100  |
| C  | 4.99399600  | -3.42737600 | 2.99752300  |
| H  | 5.19757800  | -4.08774800 | 3.83459900  |
| C  | 4.63300400  | -3.95353100 | 1.76389300  |
| H  | 4.55086100  | -5.03041900 | 1.64455100  |
| C  | 4.37259200  | -3.12264500 | 0.66686100  |
| C  | 4.92106800  | 0.33253400  | 2.28652300  |
| H  | 4.18992400  | 0.78708600  | 1.60903400  |
| C  | 4.57326000  | 0.78730700  | 3.71049000  |
| H  | 3.62561200  | 0.35597100  | 4.04895100  |
| H  | 4.47635900  | 1.87787000  | 3.73467500  |
| H  | 5.35460400  | 0.50811300  | 4.42731600  |
| C  | 6.30710600  | 0.87222500  | 1.88688400  |
| H  | 7.09340100  | 0.38710600  | 2.47818500  |
| H  | 6.36017600  | 1.95283000  | 2.07057600  |
| H  | 6.51822700  | 0.70562600  | 0.82591000  |
| C  | 3.95609000  | -3.75962700 | -0.65431800 |
| H  | 3.88301800  | -2.96826600 | -1.40919900 |
| C  | 2.57076000  | -4.41723300 | -0.51958600 |
| H  | 2.58914500  | -5.21543300 | 0.23192900  |
| H  | 2.25573100  | -4.85897900 | -1.47300900 |
| H  | 1.81765600  | -3.68535100 | -0.20985600 |
| N  | 3.05717400  | 1.67881100  | -1.37273500 |
| C  | 4.12348100  | 1.55864700  | -2.18507000 |
| C  | 4.32568300  | 2.56481200  | -3.30073800 |
| H  | 4.02044400  | 3.57212200  | -3.01035400 |
| H  | 5.36559400  | 2.58925300  | -3.63250300 |
| H  | 3.70468800  | 2.26698800  | -4.15577000 |
| C  | 2.33842200  | 2.92050400  | -1.26682100 |
| C  | 2.79136800  | 3.91026400  | -0.35529600 |
| C  | 2.00154400  | 5.05027100  | -0.17126000 |
| H  | 2.32186100  | 5.81183900  | 0.53179400  |
| C  | 0.80190900  | 5.22363900  | -0.86031700 |
| H  | 0.20103300  | 6.11173200  | -0.69060100 |
| C  | 0.38595200  | 4.26107200  | -1.77191200 |
| H  | -0.54205900 | 4.40283500  | -2.32029600 |
| C  | 1.14707600  | 3.10719400  | -1.99675000 |

|   |             |             |             |     |             |             |             |
|---|-------------|-------------|-------------|-----|-------------|-------------|-------------|
| C | 4.10662100  | 3.75494400  | 0.40960300  | 0 1 |             |             |             |
| H | 4.22384400  | 2.68697800  | 0.62892800  | C   | -1.21149600 | 4.28112700  | 0.39497500  |
| C | 4.13319400  | 4.52947600  | 1.73792500  | C   | 1.18183700  | 4.29284200  | -0.42483600 |
| H | 3.22895900  | 4.37543200  | 2.33003400  | C   | -0.01950600 | 4.89319200  | -0.02042600 |
| H | 4.99246500  | 4.20096000  | 2.33474900  | H   | -0.02555200 | 5.97566700  | -0.02245800 |
| H | 4.25311100  | 5.60652400  | 1.56679200  | C   | 1.18101300  | -4.29306200 | 0.42519200  |
| C | 5.32602900  | 4.19268000  | -0.42732500 | C   | -1.21232500 | -4.28101800 | -0.39462400 |
| H | 5.18578100  | 5.21231000  | -0.80677600 | C   | -0.02046100 | -4.89324100 | 0.02092800  |
| H | 6.22642100  | 4.18481700  | 0.19862800  | H   | -0.02672500 | -5.97571400 | 0.02318700  |
| H | 5.51134000  | 3.52843200  | -1.27355500 | C   | 2.31382500  | 5.23227400  | -0.79847300 |
| C | 0.67214500  | 2.08937200  | -3.02507300 | H   | 3.19757700  | 5.04344800  | -0.17968600 |
| H | 1.42228900  | 1.29125600  | -3.08217300 | H   | 2.62041800  | 5.07944200  | -1.83886700 |
| C | 0.54785300  | 2.71316800  | -4.42551700 | H   | 2.01638800  | 6.27414800  | -0.67268600 |
| H | 0.27627300  | 1.94722500  | -5.16072800 | C   | -2.34462900 | 5.21073400  | 0.78998000  |
| H | -0.23223600 | 3.48307000  | -4.44359300 | H   | -3.25029700 | 4.99508300  | 0.21372700  |
| H | 1.48879600  | 3.17738100  | -4.74007600 | H   | -2.60465300 | 5.07591500  | 1.84572700  |
| C | -0.66351900 | 1.45900300  | -2.60780500 | H   | -2.06928800 | 6.25414100  | 0.63102700  |
| H | -1.46905000 | 2.20122400  | -2.61950200 | C   | 2.31276700  | -5.23264900 | 0.79914700  |
| H | -0.94478300 | 0.65481300  | -3.29704500 | H   | 3.19681600  | -5.04376600 | 0.18081100  |
| H | -0.60155800 | 1.03956200  | -1.59601200 | H   | 2.61886000  | -5.08000400 | 1.83972200  |
| C | -2.03432900 | 0.99469900  | 4.97345000  | H   | 2.01530800  | -6.27448200 | 0.67307500  |
| H | -1.84940100 | 0.74359000  | 6.02436700  | C   | -2.34558500 | -5.21049300 | -0.78956600 |
| H | -1.07330200 | 0.96265400  | 4.44801800  | H   | -3.25134100 | -4.99448000 | -0.21358700 |
| H | -2.41537200 | 2.02238100  | 4.94274300  | H   | -2.60535500 | -5.07594500 | -1.84540600 |
| C | 4.98118000  | -4.79498000 | -1.14865300 | H   | -2.07050300 | -6.25391000 | -0.63023300 |
| H | 5.02614200  | -5.65878700 | -0.47521900 | C   | -2.69045500 | -2.48681000 | -0.90052000 |
| H | 4.70122500  | -5.16154000 | -2.14247600 | C   | -3.68782200 | -2.23506700 | 0.06667200  |
| H | 5.98855200  | -4.37048700 | -1.21037400 | C   | -2.94256700 | -2.29868500 | -2.27478900 |
| C | 1.00523800  | -1.41704500 | -1.71082400 | C   | -4.91563700 | -1.72221300 | -0.36285200 |
| C | 1.62280400  | -1.99564600 | -2.81066800 | C   | -4.19565100 | -1.81144700 | -2.66235900 |
| C | -0.24616100 | -1.93198200 | -1.46133800 | C   | -5.17057400 | -1.50911400 | -1.71544700 |
| C | 1.08643600  | -3.01898100 | -3.57812400 | H   | -5.68792100 | -1.49930400 | 0.36414500  |
| C | -0.84181900 | -2.97346600 | -2.15568500 | H   | -4.40932200 | -1.65782800 | -3.71490500 |
| C | -0.16180400 | -3.51779600 | -3.23323100 | H   | -6.13194000 | -1.11746900 | -2.03167200 |
| F | 2.89336500  | -1.54279000 | -3.17014800 | C   | 2.68678300  | -2.51135600 | 0.89726900  |
| F | 1.75711100  | -3.54695300 | -4.65088200 | C   | 2.97074300  | -2.32419600 | 2.26582200  |
| F | -0.74186600 | -4.52038200 | -3.96783800 | C   | 3.66250800  | -2.26388100 | -0.09164200 |
| F | -2.08197500 | -3.46890100 | -1.82062000 | C   | 4.23407000  | -1.84157100 | 2.62335900  |
| F | -1.04426200 | -1.40001300 | -0.38866900 | C   | 4.90098500  | -1.75187600 | 0.30766000  |
| C | -1.77995900 | 2.33079400  | 1.99794900  | C   | 5.18746200  | -1.54012900 | 1.65370800  |
| C | -1.16231200 | 1.27456700  | 1.34223800  | H   | 4.47390300  | -1.69039000 | 3.67052000  |
| C | -1.11975300 | 3.35407600  | 2.65992600  | H   | 5.65482600  | -1.52753800 | -0.43850900 |
| C | 0.20609900  | 1.31930300  | 1.45152800  | H   | 6.15638000  | -1.14997100 | 1.94795800  |
| C | 0.26617200  | 3.32408600  | 2.72560700  | C   | 2.68723900  | 2.51098200  | -0.89728800 |
| C | 0.94377800  | 2.27507600  | 2.12800800  | C   | 2.97104700  | 2.32396200  | -2.26591100 |
| F | -3.17447300 | 2.37521700  | 2.04249000  | C   | 3.66310000  | 2.26353700  | 0.09149700  |
| F | -1.81181500 | 4.36617600  | 3.27493000  | C   | 4.23441400  | 1.84158000  | -2.62362300 |
| F | 0.95664200  | 4.30646400  | 3.38870700  | C   | 4.90160200  | 1.75174300  | -0.30800100 |
| F | 2.31125600  | 2.18138300  | 2.21604600  | C   | 5.18795400  | 1.54018500  | -1.65409600 |
| F | 1.01204400  | 0.28911200  | 0.84759600  | H   | 4.47421500  | 1.69055900  | -3.67080600 |
|   |             |             |             | H   | 5.65558100  | 1.52748600  | 0.43805200  |
|   |             |             |             | H   | 6.15691400  | 1.15024100  | -1.94849200 |
|   |             |             |             | C   | -2.69003500 | 2.48715700  | 0.90045000  |
|   |             |             |             | C   | -3.68730400 | 2.23578100  | -0.06695500 |
|   |             |             |             | C   | -2.94248600 | 2.29888100  | 2.27463100  |
|   |             |             |             | C   | -4.91528500 | 1.72307000  | 0.36222000  |
|   |             |             |             | C   | -4.19575200 | 1.81183400  | 2.66187700  |
|   |             |             |             | C   | -5.17054200 | 1.50981900  | 1.71473800  |
|   |             |             |             | H   | -5.68743900 | 1.50038200  | -0.36498800 |
|   |             |             |             | H   | -4.40962200 | 1.65808200  | 3.71436800  |
|   |             |             |             | H   | -6.13203000 | 1.11827300  | 2.03071500  |
|   |             |             |             | Mg  | 0.00391800  | -1.49161400 | 0.00357200  |
|   |             |             |             | Mg  | 0.00423100  | 1.49155100  | -0.00355800 |
|   |             |             |             | C   | 1.91982700  | -2.63707300 | 3.32581300  |
|   |             |             |             | H   | 1.22326600  | -3.36579800 | 2.89663400  |
|   |             |             |             | C   | 3.37280500  | -2.59084300 | -1.55324900 |
|   |             |             |             | H   | 2.60341800  | -3.37095200 | -1.56458800 |
|   |             |             |             | C   | -3.43280300 | -2.56724100 | 1.53443900  |
|   |             |             |             | H   | -2.73723400 | -3.41441000 | 1.55922900  |

[Mg]-[Mg] (3.0 A, torsion = 39°)

wB97XD

6,31G+(d,p) / Lanl2DZ

Sum of electronic and zero-point Energies= -  
2477.864422  
Sum of electronic and thermal Energies= -  
2477.794228  
Sum of electronic and thermal Enthalpies= -  
2477.793284  
Sum of electronic and thermal Free Energies= -  
2477.968688

Lowest energy vibrations = 29.99 31.24 36.33 cm<sup>-1</sup>

|   |             |             |             |
|---|-------------|-------------|-------------|
| C | -1.86960200 | -2.61205800 | -3.31210700 |
| H | -1.16547300 | -3.31758500 | -2.85724900 |
| C | 3.37354300  | 2.59045000  | 1.55313800  |
| H | 2.60464500  | 3.37104500  | 1.56455500  |
| C | 1.91988100  | 2.63684900  | -3.32567500 |
| H | 1.22380900  | 3.36609700  | -2.89657400 |
| C | -3.43188700 | 2.56796900  | -1.53462800 |
| H | -2.73567000 | 3.41458900  | -1.55930400 |
| C | -1.86969500 | 2.61175700  | 3.31225800  |
| H | -1.16495000 | 3.31677600  | 2.85756700  |
| N | -1.39822600 | 2.95347000  | 0.46888100  |
| N | 1.38334300  | 2.96690400  | -0.49196100 |
| N | 1.38281400  | -2.96715500 | 0.49206900  |
| N | -1.39879600 | -2.95332500 | -0.46868400 |
| C | 2.80551100  | -1.37527300 | -2.30333200 |
| H | 3.55594800  | -0.58303000 | -2.37006600 |
| H | 2.49730400  | -1.65480900 | -3.31817100 |
| H | 1.93907000  | -0.94328100 | -1.78785900 |
| C | 4.59886000  | -3.14939800 | -2.29475900 |
| H | 5.36701200  | -2.38113900 | -2.44019100 |
| H | 5.05057800  | -3.98485400 | -1.74895000 |
| H | 4.30238500  | -3.50643500 | -3.28719600 |
| C | 2.51300700  | -3.26466700 | 4.59758200  |
| H | 3.14228400  | -4.12892300 | 4.35867400  |
| H | 3.12131100  | -2.54679900 | 5.15950800  |
| H | 1.70693600  | -3.59794200 | 5.26035100  |
| C | 1.10019000  | -1.38014100 | 3.66978300  |
| H | 0.29129600  | -1.61950000 | 4.36966000  |
| H | 1.73894000  | -0.61460400 | 4.12523200  |
| H | 0.65505300  | -0.94502100 | 2.76766500  |
| C | -1.07122300 | -1.34524100 | -3.66999000 |
| H | -0.25185600 | -1.58032100 | -4.35914100 |
| H | -1.72016400 | -0.59913000 | -4.14328700 |
| H | -0.64210000 | -0.88735500 | -2.77132900 |
| C | -2.43262000 | -3.27829100 | -4.57808700 |
| H | -3.04456700 | -4.15212800 | -4.32901600 |
| H | -3.05103100 | -2.58639600 | -5.16113300 |
| H | -1.61125200 | -3.60597700 | -5.22473300 |
| C | -4.70454500 | -2.99968500 | 2.28276100  |
| H | -5.23627800 | -3.79312300 | 1.74629800  |
| H | -4.44043600 | -3.37410100 | 3.27775700  |
| H | -5.39351200 | -2.15866600 | 2.42262000  |
| C | -2.76066800 | -1.40076700 | 2.27578600  |
| H | -1.85301600 | -1.05731600 | 1.76652300  |
| H | -3.43470500 | -0.54197100 | 2.32513400  |
| H | -2.48904100 | -1.69516100 | 3.29674600  |
| C | 1.09952000  | 1.38015900  | -3.66883400 |
| H | 0.29043600  | 1.61964000  | -4.36844800 |
| H | 1.73774200  | 0.61418600  | -4.12428600 |
| H | 0.65454200  | 0.94548100  | -2.76641300 |
| C | 2.51276400  | 3.26353500  | -4.59801700 |
| H | 3.14266300  | 4.12753800  | -4.35984800 |
| H | 3.12033100  | 2.54503200  | -5.15993200 |
| H | 1.70652900  | 3.59696100  | -5.26050800 |
| C | 2.80549200  | 1.37514700  | 2.30308900  |
| H | 3.55563000  | 0.58265600  | 2.37018200  |
| H | 2.49699300  | 1.65488300  | 3.31778300  |
| H | 1.93910700  | 0.94335600  | 1.78736900  |
| C | 4.59990600  | 3.14807400  | 2.29483500  |
| H | 5.36757200  | 2.37929400  | 2.44011000  |
| H | 5.05218400  | 3.98339500  | 1.74927700  |
| H | 4.30359400  | 3.50503300  | 3.28734700  |
| C | -2.76048400 | 1.40094200  | -2.27576600 |
| H | -3.43541900 | 0.54288000  | -2.32575400 |
| H | -2.48774600 | 1.69519800  | -3.29646700 |
| H | -1.85362900 | 1.05648200  | -1.76573300 |
| C | -4.70318200 | 3.00152400  | -2.28303700 |
| H | -5.39298600 | 2.16120200  | -2.42293200 |
| H | -5.23416400 | 3.79548800  | -1.74660300 |

|   |             |            |             |
|---|-------------|------------|-------------|
| H | -4.43867300 | 3.37567200 | -3.27803400 |
| C | -2.43285100 | 3.27852600 | 4.57788400  |
| H | -3.04399300 | 4.15280500 | 4.32836400  |
| H | -3.05213100 | 2.58718200 | 5.16066300  |
| H | -1.61159100 | 3.60565500 | 5.22494900  |
| C | -1.07229000 | 1.34444600 | 3.67054400  |
| H | -0.25322500 | 1.57894900 | 4.36024700  |
| H | -1.72195400 | 0.59861900 | 4.14330100  |
| H | -0.64285400 | 0.88648700 | 2.77207200  |

**[Mg]-[Mg] (2.85 A, torsion = 76°)**

**wB97XD**

**6,31G+(d,p) / Lanl2DZ**

Sum of electronic and zero-point Energies=  
-2477.868831

Sum of electronic and thermal Energies=  
-2477.799215

Sum of electronic and thermal Enthalpies=  
-2477.798271

Sum of electronic and thermal Free Energies=  
-2477.971366

Lowest energy vibrations = 24.79 37.89 41.99 cm<sup>-1</sup>

0 1

|    |             |             |             |
|----|-------------|-------------|-------------|
| Mg | -1.13719800 | -0.95353700 | 0.20844700  |
| N  | -2.99628500 | -1.25972700 | 1.03519700  |
| N  | -1.29970500 | -2.66843600 | -0.90527800 |
| C  | -4.87956900 | -2.63582700 | 1.85340100  |
| C  | -3.60772500 | -2.45898500 | 1.04425700  |
| C  | -3.19791100 | -3.56938800 | 0.28822800  |
| C  | -2.19689700 | -3.63643600 | -0.70005800 |
| C  | -2.17167000 | -4.87408300 | -1.57422300 |
| C  | -3.71839300 | -0.13849300 | 1.57670000  |
| C  | -3.39831800 | 0.38767900  | 2.84378500  |
| C  | -4.16088700 | 1.45101700  | 3.34368700  |
| C  | -5.19557300 | 2.00916300  | 2.60235000  |
| C  | -5.46713000 | 1.51917700  | 1.32735400  |
| C  | -4.74323800 | 0.44889800  | 0.79642400  |
| C  | -2.24891800 | -0.15822400 | 3.67972300  |
| C  | -1.24164100 | 0.95610800  | 4.01858900  |
| C  | -2.75416100 | -0.85377100 | 4.95714200  |
| C  | -5.02115600 | -0.02083700 | -0.62792200 |
| C  | -4.38284200 | 0.95597000  | -1.63423900 |
| C  | -6.51991600 | -0.20187600 | -0.92305600 |
| C  | -0.34289300 | -2.76722600 | -1.97186300 |
| C  | 0.85740000  | -3.48693700 | -1.78419400 |
| C  | 1.81885800  | -3.46294600 | -2.79950900 |
| C  | 1.59944000  | -2.76441900 | -3.98389400 |
| C  | 0.40551600  | -2.07274300 | -4.16318200 |
| C  | -0.57506200 | -2.05029800 | -3.16498100 |
| C  | 1.13892900  | -4.24335900 | -0.49186500 |
| C  | 2.16507900  | -3.48607400 | 0.36586400  |
| C  | 1.60718900  | -5.68783000 | -0.74523400 |
| C  | -1.86153400 | -1.26258300 | -3.38751700 |
| C  | -1.56939800 | 0.21446700  | -3.69871800 |
| C  | -2.72497800 | -1.90105700 | -4.49133300 |
| H  | -4.79685100 | -2.15295400 | 2.83056500  |
| H  | -5.10255700 | -3.69466600 | 1.99614700  |
| H  | -5.73060400 | -2.17334500 | 1.34100400  |
| H  | -3.80303600 | -4.46037800 | 0.40164200  |
| H  | -2.21833600 | -4.59511900 | -2.63196400 |
| H  | -3.00995600 | -5.53437400 | -1.34779500 |
| H  | -1.24078000 | -5.43291700 | -1.43607700 |
| H  | -3.93699500 | 1.84784000  | 4.32918500  |
| H  | -5.77595100 | 2.83158400  | 3.00654300  |

|    |             |             |             |
|----|-------------|-------------|-------------|
| H  | -6.25330400 | 1.97797200  | 0.73647300  |
| H  | -1.72669200 | -0.91019600 | 3.07796900  |
| H  | -0.84282000 | 1.40530900  | 3.10195700  |
| H  | -0.40387100 | 0.55615900  | 4.59944700  |
| H  | -1.70776100 | 1.75131900  | 4.61115800  |
| H  | -3.29342400 | -0.14905300 | 5.60093700  |
| H  | -1.91436300 | -1.26142000 | 5.53182100  |
| H  | -3.43286700 | -1.67791400 | 4.71454600  |
| H  | -4.54023700 | -0.99352300 | -0.76899200 |
| H  | -4.83428300 | 1.95156100  | -1.54596800 |
| H  | -4.53186000 | 0.60030600  | -2.66037600 |
| H  | -3.30668100 | 1.06356800  | -1.45945900 |
| H  | -6.99650800 | -0.85551600 | -0.18480300 |
| H  | -6.65510600 | -0.64897900 | -1.91407800 |
| H  | -7.05217100 | 0.75612000  | -0.91849400 |
| H  | 2.75505200  | -3.99377300 | -2.65825100 |
| H  | 2.35562900  | -2.75823700 | -4.76146100 |
| H  | 0.23341900  | -1.53568100 | -5.09105900 |
| H  | 0.20774800  | -4.29168300 | 0.08183700  |
| H  | 3.13302100  | -3.42208200 | -0.14310000 |
| H  | 2.32198200  | -3.98889100 | 1.32605800  |
| H  | 1.83076700  | -2.46299900 | 0.56878500  |
| H  | 0.90767100  | -6.23404400 | -1.38741500 |
| H  | 1.69506900  | -6.22532800 | 0.20534600  |
| H  | 2.59064300  | -5.70945300 | -1.22839200 |
| H  | -2.44045800 | -1.30071400 | -2.45708900 |
| H  | -0.99987700 | 0.68440400  | -2.88968000 |
| H  | -2.49888000 | 0.77784300  | -3.82720600 |
| H  | -0.98933600 | 0.32260400  | -4.62246800 |
| H  | -2.20537900 | -1.87785100 | -5.45660100 |
| H  | -3.66949100 | -1.35574200 | -4.60136100 |
| H  | -2.95720800 | -2.94561300 | -4.25830500 |
| Mg | 1.05036800  | 0.86345400  | 0.45535900  |
| N  | 1.29915000  | 2.79214300  | -0.20520800 |
| N  | 2.85772100  | 0.91965000  | 1.43244300  |
| C  | 2.08683900  | 5.13010700  | -0.06802700 |
| C  | 2.12297200  | 3.67735400  | 0.36648500  |
| C  | 3.05615200  | 3.34272600  | 1.36629600  |
| C  | 3.45878000  | 2.06689500  | 1.79396000  |
| C  | 4.70212600  | 2.01333600  | 2.66228400  |
| C  | 0.48113900  | 3.18282200  | -1.31840500 |
| C  | 0.90537400  | 2.83078900  | -2.62175500 |
| C  | 0.10129000  | 3.19998800  | -3.70484600 |
| C  | -1.11242700 | 3.85567400  | -3.51132400 |
| C  | -1.53933700 | 4.15215400  | -2.22172400 |
| C  | -0.75251900 | 3.83319200  | -1.10898500 |
| C  | 2.19971200  | 2.04714900  | -2.83385400 |
| C  | 3.44878500  | 2.94792100  | -2.76677000 |
| C  | 2.20341900  | 1.23480300  | -4.13747600 |
| C  | -1.26125100 | 4.15816300  | 0.29005200  |
| C  | -2.41726000 | 3.22077600  | 0.67776700  |
| C  | -1.69521300 | 5.62924200  | 0.43067300  |
| C  | 3.55724400  | -0.30931400 | 1.69806400  |
| C  | 4.55899900  | -0.72760900 | 0.79291200  |
| C  | 5.28993600  | -1.88320200 | 1.08294700  |
| C  | 5.03434700  | -2.62495200 | 2.23346500  |
| C  | 4.00516000  | -2.23719800 | 3.08438200  |
| C  | 3.24340800  | -1.09107700 | 2.82721100  |
| C  | 4.79743500  | 0.00971300  | -0.52013000 |
| C  | 4.22504200  | -0.81855300 | -1.68759400 |
| C  | 6.27836100  | 0.34666300  | -0.76167400 |
| C  | 2.08440500  | -0.74013400 | 3.74990100  |
| C  | 2.55547000  | -0.40651000 | 5.17707600  |
| C  | 1.04747300  | -1.87956900 | 3.76786300  |
| H  | 2.02479200  | 5.21651100  | -1.15626900 |
| H  | 2.97232600  | 5.66438600  | 0.27993700  |
| H  | 1.20243600  | 5.62742300  | 0.34502700  |
| H  | 3.62047800  | 4.17235200  | 1.77367200  |
| H  | 4.58246100  | 1.30426700  | 3.48545200  |

|   |             |             |             |
|---|-------------|-------------|-------------|
| H | 4.93333500  | 2.99867100  | 3.07030900  |
| H | 5.56343200  | 1.67368000  | 2.07595500  |
| H | 0.40936100  | 2.94946200  | -4.71307000 |
| H | -1.72801800 | 4.12060200  | -4.36435100 |
| H | -2.49739000 | 4.64043500  | -2.07356000 |
| H | 2.27967500  | 1.32878500  | -2.00600800 |
| H | 3.39553700  | 3.73190100  | -3.53138300 |
| H | 4.35216600  | 2.35291900  | -2.94841300 |
| H | 3.55411900  | 3.42185100  | -1.78740000 |
| H | 1.31034200  | 0.60920800  | -4.21629300 |
| H | 3.07546100  | 0.57425200  | -4.16240000 |
| H | 2.26003400  | 1.88491300  | -5.01864000 |
| H | -0.44426100 | 3.98034600  | 0.99737200  |
| H | -3.26912400 | 3.34913900  | 0.00031800  |
| H | -2.76276100 | 3.42241800  | 1.69676600  |
| H | -2.10636500 | 2.17164800  | 0.62913800  |
| H | -0.91184200 | 6.31774200  | 0.09638600  |
| H | -1.92964700 | 5.85267200  | 1.47731500  |
| H | -2.59490900 | 5.83591700  | -0.16018600 |
| H | 6.06321600  | -2.21196500 | 0.39539600  |
| H | 5.61759300  | -3.51318100 | 2.45153000  |
| H | 3.78477600  | -2.83616600 | 3.96295800  |
| H | 4.24713000  | 0.95567500  | -0.48580400 |
| H | 4.71837100  | -1.79616600 | -1.74967000 |
| H | 4.37997100  | -0.29883700 | -2.63945600 |
| H | 3.15088000  | -0.99886000 | -1.56458900 |
| H | 6.69795200  | 0.91708900  | 0.07357700  |
| H | 6.38285100  | 0.94709100  | -1.67242800 |
| H | 6.88278000  | -0.55869300 | -0.89031800 |
| H | 1.59790600  | 0.15309800  | 3.34314200  |
| H | 3.04002500  | -1.27153900 | 5.64487600  |
| H | 1.70286800  | -0.11920300 | 5.80364800  |
| H | 3.27097000  | 0.42207100  | 5.17552000  |
| H | 0.65315800  | -2.05908500 | 2.76138000  |
| H | 0.20888800  | -1.62992400 | 4.42673600  |
| H | 1.49070900  | -2.81409000 | 4.13009800  |

**[Mg]-F  
wB97XD  
6,31G+(d,p) / Lanl2DZ**

Sum of electronic and zero-point Energies=  
-1338.806442

Sum of electronic and thermal Energies=  
-1338.770789

Sum of electronic and thermal Enthalpies=  
-1338.769845

Sum of electronic and thermal Free Energies=  
-1338.873281

Lowest energy vibrations = 31.67 43.77 55.07 cm<sup>-1</sup>

|            |             |             |             |
|------------|-------------|-------------|-------------|
| 0 1        |             |             |             |
| Mg         | -0.00000100 | -0.13001300 | -           |
| 0.71796400 |             |             |             |
| N          | 1.46544100  | 0.09235700  | 0.59739300  |
| C          | 1.26988800  | 0.21857900  | 1.91808800  |
| C          | 0.00000800  | 0.28150700  | 2.52163600  |
| H          | 0.00001100  | 0.38131800  | 3.59956500  |
| C          | 2.47946700  | 0.28145800  | 2.82555100  |
| H          | 3.09042100  | -0.61994700 | 2.70635900  |
| H          | 2.18729400  | 0.37296200  | 3.87225900  |
| H          | 3.11803300  | 1.13187700  | 2.56316600  |
| C          | 2.79661800  | 0.02417000  | 0.05595200  |
| C          | 3.36479500  | -1.23704300 | -0.21051800 |
| C          | 4.62494700  | -1.28356400 | -0.81686700 |

|   |             |             |             |
|---|-------------|-------------|-------------|
| H | 5.07655000  | -2.24504700 | -1.03776500 |
| C | 5.30295500  | -0.11513600 | -1.15059500 |
| H | 6.27809300  | -0.16951000 | -1.62222800 |
| C | 4.72193700  | 1.12481400  | -0.89330400 |
| H | 5.25173800  | 2.02884100  | -1.17341200 |
| C | 3.46344300  | 1.21717400  | -0.29219300 |
| C | 2.60245200  | -2.52133900 | 0.09270900  |
| H | 1.77062600  | -2.26493400 | 0.75936900  |
| C | 2.00372300  | -3.10804500 | -1.20377600 |
| H | 1.36971000  | -2.38698000 | -1.73334200 |
| H | 1.40439900  | -3.99806700 | -0.97850200 |
| H | 2.80504800  | -3.40380600 | -1.89127000 |
| C | 3.46479500  | -3.56476200 | 0.82284800  |
| H | 4.27387800  | -3.93583700 | 0.18377200  |
| H | 2.85072900  | -4.42574900 | 1.10878000  |
| H | 3.91416100  | -3.14507600 | 1.72935100  |
| C | 2.78328600  | 2.56619300  | -0.08968100 |
| H | 2.03419300  | 2.45045500  | 0.70146800  |
| C | 2.03384100  | 2.97169100  | -1.37559600 |
| H | 2.74126800  | 3.12036000  | -2.19912300 |
| H | 1.47414400  | 3.90159600  | -1.22553100 |
| H | 1.32906000  | 2.19446100  | -1.69476400 |
| N | -1.46543700 | 0.09234300  | 0.59740300  |
| C | -1.26987600 | 0.21856500  | 1.91809700  |
| C | -2.47944900 | 0.28143900  | 2.82556600  |
| H | -3.09039800 | -0.61997100 | 2.70638100  |
| H | -2.18727100 | 0.37295000  | 3.87227200  |
| H | -3.11802200 | 1.13185300  | 2.56318100  |
| C | -2.79661700 | 0.02413400  | 0.05597100  |
| C | -3.36475800 | -1.23709200 | -0.21050800 |
| C | -4.62491100 | -1.28364500 | -0.81685300 |
| H | -5.07648500 | -2.24514000 | -1.03775900 |
| C | -5.30295500 | -0.11523400 | -1.15057000 |
| H | -6.27809300 | -0.16963400 | -1.62219900 |
| C | -4.72197000 | 1.12472900  | -0.89327600 |
| H | -5.25179500 | 2.02874700  | -1.17337100 |
| C | -3.46347700 | 1.21712100  | -0.29217000 |
| C | -2.60237000 | -2.52136600 | 0.09269600  |
| H | -1.77054000 | -2.26493800 | 0.75934200  |
| C | -2.00364200 | -3.10804000 | -1.20380500 |
| H | -1.36969000 | -2.38693400 | -1.73338700 |
| H | -1.40426000 | -3.99802700 | -0.97854600 |
| H | -2.80496800 | -3.40384900 | -1.89127600 |
| C | -3.46466600 | -3.56482200 | 0.82284300  |
| H | -4.27374800 | -3.93591900 | 0.18377900  |
| H | -2.85056800 | -4.42579100 | 1.10876100  |
| H | -3.91403200 | -3.14515700 | 1.72935600  |
| C | -2.78337800 | 2.56616800  | -0.08966300 |
| H | -2.03432000 | 2.45049400  | 0.70152800  |
| C | -3.74860400 | 3.67790500  | 0.35062700  |
| H | -3.18747400 | 4.58546000  | 0.59837900  |
| H | -4.45754100 | 3.93889800  | -0.44293100 |
| H | -4.32289800 | 3.37673900  | 1.23322100  |
| C | -2.03389300 | 2.97165600  | -1.37555800 |
| H | -2.74129100 | 3.12026700  | -2.19912100 |
| H | -1.47424300 | 3.90159100  | -1.22549900 |
| H | -1.32906600 | 2.19444500  | -1.69467100 |
| F | -0.00001300 | -0.64868000 | -2.42141100 |
| C | 3.74843000  | 3.67796500  | 0.35070300  |
| H | 4.45736400  | 3.93906800  | -0.44282100 |
| H | 3.18723300  | 4.58546300  | 0.59850700  |
| H | 4.32272700  | 3.37677700  | 1.23328800  |

**[Mg]-F-[Mg]-C<sub>6</sub>F<sub>5</sub>  
wB97XD  
6,31G+(d,p) / Lanl2DZ**

Sum of electronic and zero-point Energies= - 3305.212727  
Sum of electronic and thermal Energies= - 3305.133160  
Sum of electronic and thermal Enthalpies= - 3305.132216  
Sum of electronic and thermal Free Energies= - 3305.323081

Lowest energy vibrations = 28.15 32.76 45.19 cm<sup>-1</sup>

|     |             |             |             |
|-----|-------------|-------------|-------------|
| 0 1 |             |             |             |
| Mg  | -1.28948100 | -0.91616400 | 0.25581100  |
| N   | -1.57802500 | -2.91862500 | 0.09013500  |
| C   | -1.55713200 | -3.76042300 | 1.13255600  |
| C   | -1.57957400 | -3.35530600 | 2.47885000  |
| H   | -1.54908700 | -4.15459400 | 3.20881500  |
| C   | -1.71965800 | -2.05896200 | 3.00512700  |
| N   | -1.70394200 | -0.94518300 | 2.26467400  |
| C   | -1.51545200 | -5.25505800 | 0.87759200  |
| H   | -2.26042200 | -5.55242000 | 0.13472600  |
| H   | -1.69026600 | -5.81493400 | 1.79754700  |
| H   | -0.53569000 | -5.54050600 | 0.47942200  |
| C   | -1.87098400 | -1.95579900 | 4.51090200  |
| H   | -2.15556600 | -2.91617500 | 4.94380500  |
| H   | -2.61364100 | -1.20508000 | 4.79150800  |
| H   | -0.91934400 | -1.64824800 | 4.95954300  |
| C   | -1.73231800 | -3.44566600 | -1.23776300 |
| C   | -3.02804100 | -3.47203300 | -1.80642400 |
| C   | -3.16750300 | -3.97366600 | -3.10324700 |
| H   | -4.14742100 | -4.00316300 | -3.56444000 |
| C   | -2.06251600 | -4.41119900 | -3.83156500 |
| H   | -2.19473900 | -4.79078000 | -4.83925100 |
| C   | -0.79155900 | -4.34269400 | -3.27263200 |
| H   | 0.06779800  | -4.66508300 | -3.85276300 |
| C   | -0.60356700 | -3.86413800 | -1.97062700 |
| C   | -4.23147700 | -2.93053400 | -1.03294500 |
| H   | -3.89034500 | -2.02079300 | -0.52018200 |
| C   | -5.40783100 | -2.52658900 | -1.93652600 |
| H   | -5.08308100 | -1.86471700 | -2.74179900 |
| H   | -6.15928600 | -1.99838200 | -1.33890500 |
| H   | -5.89894600 | -3.40482000 | -2.37297200 |
| C   | -4.73549800 | -3.90687000 | 0.05024400  |
| H   | -4.97259000 | -4.88116900 | -0.39368100 |
| H   | -5.64904800 | -3.51187700 | 0.51020500  |
| H   | -4.00297600 | -4.05150100 | 0.84705400  |
| C   | 0.80350600  | -3.77261000 | -1.39067300 |
| H   | 0.71648300  | -3.52219300 | -0.32835200 |
| C   | 1.58087300  | -5.09630200 | -1.50035400 |
| H   | 1.02288700  | -5.92892900 | -1.05920100 |
| H   | 2.54227700  | -5.00651900 | -0.98321700 |
| H   | 1.78630100  | -5.35063500 | -2.54672100 |
| C   | 1.59944200  | -2.63595200 | -2.05834800 |
| H   | 1.75105800  | -2.83870900 | -3.12582600 |
| H   | 2.58172500  | -2.54008400 | -1.58253000 |
| H   | 1.06271200  | -1.68761600 | -1.96647700 |
| C   | -2.04649300 | 0.31525200  | 2.85718800  |
| C   | -1.06690700 | 1.12188500  | 3.46924300  |
| C   | -1.45024600 | 2.35984700  | 3.99351700  |

|    |             |             |             |
|----|-------------|-------------|-------------|
| H  | -0.70646700 | 2.99351200  | 4.46810000  |
| C  | -2.76306100 | 2.80846200  | 3.88575900  |
| H  | -3.04215700 | 3.77598700  | 4.28853100  |
| C  | -3.71266900 | 2.02311800  | 3.23540900  |
| H  | -4.72625500 | 2.39433800  | 3.12859900  |
| C  | -3.37532400 | 0.77307200  | 2.70853900  |
| C  | 0.40067000  | 0.71120900  | 3.47980600  |
| H  | 0.45832500  | -0.27669800 | 3.01515700  |
| C  | 0.99202800  | 0.61766000  | 4.89598000  |
| H  | 0.97765100  | 1.59499600  | 5.39204800  |
| H  | 2.03431300  | 0.27985800  | 4.85245800  |
| H  | 0.42927700  | -0.08056000 | 5.52242300  |
| C  | 1.24343400  | 1.67966500  | 2.62549800  |
| H  | 0.76494900  | 1.85688500  | 1.65614200  |
| H  | 2.27268200  | 1.30863000  | 2.50291200  |
| H  | 1.32480700  | 2.66360500  | 3.10022200  |
| C  | -4.41021200 | -0.08693400 | 1.98825400  |
| H  | -3.86045500 | -0.75942400 | 1.32047000  |
| C  | -5.38027300 | 0.72557400  | 1.11688200  |
| H  | -6.06205200 | 1.33504600  | 1.72114800  |
| H  | -5.99262900 | 0.04577700  | 0.51396300  |
| H  | -4.83926700 | 1.38960900  | 0.43684700  |
| C  | -5.18608200 | -0.97868900 | 2.97707100  |
| H  | -4.51386900 | -1.65597200 | 3.51203700  |
| H  | -5.92218900 | -1.58912700 | 2.44144800  |
| H  | -5.71747400 | -0.36451200 | 3.71386800  |
| C  | -2.23026000 | 0.67554800  | -0.87650300 |
| C  | -2.16401000 | 1.94011900  | -0.31922200 |
| F  | -1.27834900 | 2.15059800  | 0.74016100  |
| C  | -2.89906000 | 3.03711600  | -0.73880300 |
| F  | -2.83317200 | 4.25085500  | -0.09741300 |
| C  | -3.70785500 | 2.89262700  | -1.85734700 |
| C  | -3.77148000 | 1.66627200  | -2.50637600 |
| F  | -4.54910100 | 1.53283600  | -3.63237200 |
| C  | -3.03786000 | 0.60039600  | -1.99793500 |
| F  | -3.11393800 | -0.59495600 | -2.70510600 |
| F  | -4.40873700 | 3.96991700  | -2.34186000 |
| F  | 0.54767600  | -0.49235200 | 0.07633900  |
| Mg | 2.04100500  | 0.52361100  | -0.00321700 |
| N  | 2.39678800  | 2.41344400  | -0.56959600 |
| N  | 3.89285000  | -0.06470100 | 0.38541200  |
| C  | 3.61580400  | 2.91127800  | -0.35508000 |
| C  | 1.35312400  | 3.15870400  | -1.23196900 |
| C  | 4.77571300  | 0.89723700  | 0.73172900  |
| C  | 4.29455500  | -1.44561700 | 0.35248000  |
| C  | 4.62901300  | 2.24814600  | 0.39309400  |
| C  | 4.03261300  | 4.25005000  | -0.92631800 |
| C  | 0.83044900  | 2.64560100  | -2.44235000 |
| C  | 0.79259000  | 4.32197400  | -0.64846900 |
| C  | 5.99641600  | 0.50919000  | 1.54093000  |
| C  | 5.05489600  | -1.92840000 | -0.74527400 |
| C  | 3.86683800  | -2.33059300 | 1.36482500  |
| H  | 5.46861100  | 2.88155700  | 0.65650900  |
| H  | 3.27633500  | 4.67065100  | -1.58871300 |
| H  | 4.96289200  | 4.12148200  | -1.48739400 |
| H  | 4.23000700  | 4.96584500  | -0.12248500 |
| C  | -0.20624400 | 3.33312200  | -3.08033400 |
| C  | 1.41766300  | 1.41592100  | -3.12283500 |
| C  | -0.23178100 | 4.98171400  | -1.33626100 |
| C  | 1.21704700  | 4.88599300  | 0.70625900  |
| H  | 6.45185500  | -0.41372100 | 1.17764200  |
| H  | 6.74883600  | 1.29929700  | 1.53853500  |
| H  | 5.68582200  | 0.33179300  | 2.57794400  |

|   |             |             |             |
|---|-------------|-------------|-------------|
| C | 5.38238700  | -3.28986000 | -0.77560400 |
| C | 5.55307300  | -1.09421700 | -1.93136700 |
| C | 4.20877600  | -3.68578400 | 1.27733800  |
| C | 3.06498500  | -1.86642400 | 2.57298900  |
| H | -0.60894600 | 2.94880000  | -4.01064500 |
| C | -0.72905400 | 4.50259700  | -2.54205700 |
| H | 2.00560600  | 0.84960100  | -2.38861200 |
| C | 0.35500300  | 0.45909800  | -3.68490800 |
| C | 2.41340900  | 1.85185400  | -4.21544100 |
| H | -0.67327700 | 5.86988100  | -0.89949300 |
| H | 2.00808500  | 4.24828600  | 1.11697700  |
| C | 0.04339500  | 4.87981400  | 1.70870000  |
| H | 5.96292400  | -3.66811400 | -1.61151500 |
| C | 4.96898600  | -4.16826000 | 0.22103700  |
| H | 5.85047600  | -1.84084900 | -2.68018900 |
| C | 6.82236300  | -0.27125300 | -1.62784800 |
| C | 4.49868400  | -0.21204900 | -2.61475400 |
| H | 3.87824600  | -4.36849600 | 2.05339000  |
| H | 2.88391400  | -0.79090400 | 2.46655700  |
| C | 3.86401100  | -2.06769700 | 3.87534200  |
| C | 1.70263200  | -2.57687300 | 2.64937300  |
| H | -1.54107200 | 5.01998900  | -3.04098900 |
| H | -0.36921200 | 0.17285400  | -2.91697700 |
| H | 0.83302800  | -0.44979200 | -4.06463900 |
| H | -0.19623500 | 0.90903900  | -4.51690300 |
| H | 1.89906500  | 2.45457900  | -4.97219700 |
| H | 2.85367700  | 0.97916000  | -4.70879800 |
| H | 3.22164800  | 2.45540400  | -3.78854300 |
| H | -0.73269600 | 5.58850700  | 1.40090300  |
| H | 0.39925800  | 5.18180100  | 2.70129100  |
| H | -0.42736200 | 3.90033500  | 1.78301400  |
| H | 5.22958000  | -5.21949200 | 0.16615900  |
| H | 7.56162300  | -0.86692200 | -1.08239000 |
| H | 7.27799200  | 0.06094000  | -2.56775700 |
| H | 6.58868400  | 0.62327300  | -1.04382500 |
| H | 4.25978200  | 0.67135100  | -2.01741500 |
| H | 4.88687400  | 0.13677300  | -3.57821800 |
| H | 3.57605400  | -0.76996800 | -2.80740800 |
| H | 3.30685900  | -1.67118800 | 4.73109500  |
| H | 4.04813900  | -3.13200200 | 4.06053400  |
| H | 4.83456400  | -1.56304100 | 3.82782200  |
| H | 1.81984900  | -3.66513900 | 2.69045600  |
| H | 1.15804500  | -2.27312900 | 3.54962700  |
| H | 1.07963500  | -2.33909200 | 1.78244300  |
| C | 1.76236700  | 6.32523300  | 0.58568000  |
| H | 0.95753900  | 7.01738200  | 0.31393100  |
| H | 2.17165700  | 6.65578800  | 1.54698800  |
| H | 2.54369900  | 6.41509500  | -0.17283300 |

**[Mg]-F-[Mg]-F  
wB97XD  
6,31G+(d,p) / Lanl2DZ**

Sum of electronic and zero-point Energies= -  
2677.693924  
Sum of electronic and thermal Energies= -  
2677.622551  
Sum of electronic and thermal Enthalpies= -  
2677.621607  
Sum of electronic and thermal Free Energies= -  
2677.795761

Lowest energy vibrations = 32.75 37.83 47.62 cm<sup>-1</sup>



|    |             |             |             |    |             |             |             |
|----|-------------|-------------|-------------|----|-------------|-------------|-------------|
| O  | 1           |             |             | H  | 4.01149000  | 1.05652600  | 2.47817500  |
| Mg | 2.02198000  | 0.23385000  | 0.36665600  | C  | 5.36549700  | 4.23641900  | 1.90997300  |
| N  | 3.03593500  | -0.28535600 | -1.31543700 | H  | 5.08846900  | 5.11218700  | 1.31181000  |
| C  | 3.41548400  | 0.59033100  | -2.25199500 | H  | 6.36574900  | 3.91170400  | 1.60287100  |
| C  | 3.18043100  | 1.97858400  | -2.18516000 | H  | 5.43139500  | 4.54941600  | 2.95832400  |
| H  | 3.51372000  | 2.54690600  | -3.04486600 | F  | 0.19843800  | -0.12621300 | 0.07007700  |
| C  | 2.65894300  | 2.74311500  | -1.12293800 | Mg | -1.57862900 | -0.39646100 | -0.07621000 |
| N  | 2.19081500  | 2.22427000  | 0.01632900  | N  | -2.36940800 | -1.96886600 | 0.84316900  |
| C  | 4.16235200  | 0.08143000  | -3.46952300 | N  | -2.96388800 | -0.11891300 | -1.48295800 |
| H  | 5.05133400  | -0.48079600 | -3.16538300 | C  | -3.19151900 | -2.75326500 | 0.14377700  |
| H  | 4.47096400  | 0.90213800  | -4.11858500 | C  | -1.96633500 | -2.27886100 | 2.19385400  |
| H  | 3.53740200  | -0.60685400 | -4.04936200 | C  | -3.69374000 | -1.20335900 | -1.83443000 |
| C  | 2.68946600  | 4.25038900  | -1.28470700 | C  | -3.34527000 | 1.18723400  | -1.96328400 |
| H  | 2.91016700  | 4.53277200  | -2.31535500 | C  | -3.70126400 | -2.42157500 | -1.13716900 |
| H  | 3.45661800  | 4.68751000  | -0.63482000 | C  | -3.63532200 | -4.08880900 | 0.70184400  |
| H  | 1.73400200  | 4.69441200  | -0.98901000 | C  | -0.91952300 | -3.18853400 | 2.45035200  |
| C  | 3.41442000  | -1.66833600 | -1.41376900 | C  | -2.59193600 | -1.57574000 | 3.24973600  |
| C  | 4.54120700  | -2.11724100 | -0.69149500 | C  | -4.56793500 | -1.15815300 | -3.07543900 |
| C  | 4.86797400  | -3.47739000 | -0.73393100 | C  | -2.65747200 | 1.84537500  | -3.00945500 |
| H  | 5.73209500  | -3.83192400 | -0.18088100 | C  | -4.43202100 | 1.82633800  | -1.31109700 |
| C  | 4.10498700  | -4.38098200 | -1.46600400 | H  | -4.29910700 | -3.20118000 | -1.59559100 |
| H  | 4.37282600  | -5.43197900 | -1.48664500 | H  | -3.01152500 | -4.88411200 | 0.27808600  |
| C  | 2.98763800  | -3.92971400 | -2.16296400 | H  | -4.67281500 | -4.29555600 | 0.43014600  |
| H  | 2.38308500  | -4.63983000 | -2.71856500 | H  | -3.53436700 | -4.12867200 | 1.78754100  |
| C  | 2.62395000  | -2.57933400 | -2.14846800 | C  | -0.54701900 | -3.41707800 | 3.78012200  |
| C  | 5.39963800  | -1.16550800 | 0.13383000  | C  | -0.15444000 | -3.89035700 | 1.33867100  |
| H  | 4.96811000  | -0.16210400 | 0.04468200  | C  | -2.18793600 | -1.84074400 | 4.56122400  |
| C  | 5.37321700  | -1.55215900 | 1.62414700  | C  | -3.70107100 | -0.56765100 | -2.36733300 |
| H  | 4.35584700  | -1.45360400 | 2.01499000  | H  | -4.80102800 | -0.13726000 | -3.37964100 |
| H  | 6.02719000  | -0.88631400 | 2.19873500  | H  | -4.03698600 | -1.64102700 | -3.90358200 |
| H  | 5.72604100  | -2.57973600 | 1.77339600  | H  | -5.50086900 | -1.70354100 | -2.91739600 |
| C  | 6.83967800  | -1.09823000 | -0.40862100 | C  | -3.10367200 | 3.11698300  | -3.39814400 |
| H  | 7.34311900  | -2.06780900 | -0.31418900 | C  | -1.44067100 | 1.30334600  | -3.75799500 |
| H  | 7.42130000  | -0.36155100 | 0.15694700  | C  | -4.84293100 | 3.09006000  | -1.74794900 |
| H  | 6.85576600  | -0.81048700 | -1.46591800 | C  | -5.17893900 | 1.16749500  | -0.15302800 |
| C  | 1.34566700  | -2.13808000 | -2.85017300 | H  | 0.26315300  | -4.10762700 | 3.98913500  |
| H  | 1.34509000  | -1.04481000 | -2.88655100 | C  | -1.17753600 | -2.76070300 | 4.82897700  |
| C  | 1.23559500  | -2.66274100 | -4.29046200 | H  | -0.59466600 | -3.57920200 | 0.38737200  |
| H  | 2.10977700  | -2.37706000 | -4.88535300 | C  | 1.33186400  | -3.47447200 | 1.34340200  |
| H  | 0.34070700  | -2.25559600 | -4.77287200 | C  | -0.27577300 | -5.42403000 | 1.42662700  |
| H  | 1.15400300  | -3.75511600 | -4.31751000 | H  | -2.65753600 | -1.31697000 | 5.38534600  |
| C  | 0.13149800  | -2.57136700 | -2.00739800 | H  | -3.46783200 | -0.07913300 | 2.01248000  |
| H  | 0.07372800  | -3.66388800 | -1.93641600 | C  | -3.79890700 | 0.53895500  | 4.02886600  |
| H  | -0.81094500 | -2.21245700 | -2.43937900 | H  | -2.58287500 | 3.62526500  | -4.20374500 |
| H  | 0.24360900  | -2.17802500 | -0.99452300 | C  | -4.18885300 | 3.73617100  | -2.78968300 |
| C  | 1.87586900  | 3.07159200  | 1.13097200  | H  | -1.26992400 | 2.02051100  | -4.57256100 |
| C  | 0.53401200  | 3.37881900  | 1.43325400  | C  | -1.64902200 | -0.05925700 | -4.43431600 |
| C  | 0.25327900  | 4.14939300  | 2.56743200  | C  | -0.16116000 | 1.32528300  | -2.90706700 |
| H  | -0.77770700 | 4.39983000  | 2.80119300  | H  | -5.68557900 | 3.57410800  | -1.26638200 |
| C  | 1.27358000  | 4.59623300  | 3.39919900  | H  | -4.56901400 | 0.33429000  | 0.21219200  |
| H  | 1.04200600  | 5.18791700  | 4.27836900  | C  | -6.52823900 | 0.57897500  | -0.60979900 |
| C  | 2.59527500  | 4.26751600  | 3.10518400  | C  | -5.40288400 | 2.13855300  | 1.02013700  |
| H  | 3.38551600  | 4.59790500  | 3.77117100  | H  | -0.87186200 | -2.94830900 | 5.85226400  |
| C  | 2.91993200  | 3.50676700  | 1.97907400  | H  | 1.46830100  | -2.39724300 | 1.47844300  |
| C  | -0.60716400 | 2.89047700  | 0.55311300  | H  | 1.82202200  | -3.78709000 | 0.41441100  |
| H  | -0.16160900 | 2.26915500  | -0.22793700 | H  | 1.85990500  | -3.95721800 | 2.17499100  |
| C  | -1.35488700 | 4.04888000  | -0.12809600 | H  | 0.20587000  | -5.80148000 | 2.33589300  |
| H  | -1.80759100 | 4.71564400  | 0.61528700  | H  | 0.22455500  | -5.88798500 | 0.56905500  |
| H  | -2.15110800 | 3.66963000  | -0.77712500 | H  | -1.31990600 | -5.75332000 | 1.44122800  |
| H  | -0.67139700 | 4.64534400  | -0.74106900 | H  | -4.19050100 | 0.15441700  | 4.97730600  |
| C  | -1.59086600 | 2.01548100  | 1.35413400  | H  | -4.48257900 | 1.32300400  | 3.68908300  |
| H  | -1.07094200 | 1.19140200  | 1.86182200  | H  | -2.82108800 | 0.99280700  | 4.22050100  |
| H  | -2.40101400 | 1.65843800  | 0.69322100  | H  | -4.51631100 | 4.71549300  | -3.12053500 |
| H  | -2.09982800 | 2.58579200  | 2.13846000  | H  | -2.55486200 | -0.05910400 | -5.04924900 |
| C  | 4.36214900  | 3.08627500  | 1.72320400  | H  | -0.79517700 | -0.27954100 | -5.08450000 |
| H  | 4.43993000  | 2.75035000  | 0.68419700  | H  | -1.72708000 | -0.86117500 | -3.69771200 |
| C  | 4.71994100  | 1.88112200  | 2.61668800  | H  | -0.16395800 | 0.57268500  | -2.11431600 |
| H  | 4.69646500  | 2.17126200  | 3.67453600  | H  | 0.71618500  | 1.12299000  | -3.53017600 |
| H  | 5.72992700  | 1.52307300  | 2.38311900  | H  | -0.00980300 | 2.30543900  | -2.44476700 |

|   |             |             |             |
|---|-------------|-------------|-------------|
| H | -7.03395800 | 0.09410200  | 0.23286000  |
| H | -7.18265600 | 1.37054700  | -0.99365200 |
| H | -6.39568200 | -0.16431600 | -1.39953700 |
| H | -6.09972800 | 2.94032700  | 0.75349600  |
| H | -5.83749700 | 1.60177900  | 1.86954800  |
| H | -4.46593700 | 2.60006900  | 1.34649200  |
| F | 2.42010100  | -0.43592200 | 2.00163200  |
| C | -5.05992000 | -1.27331900 | 2.78863700  |
| H | -5.31822600 | -1.83076200 | 3.69625300  |
| H | -5.85385500 | -0.54211800 | 2.59758000  |
| H | -5.03762200 | -1.97428100 | 1.94898200  |

**[Mg]-C<sub>6</sub>F<sub>5</sub>/F-[Mg]  
wB97XD  
6,31G+(d,p) / LanL2DZ**

Sum of electronic and zero-point Energies= -  
3305.234724  
Sum of electronic and thermal Energies= -  
3305.154688  
Sum of electronic and thermal Enthalpies= -  
3305.153743  
Sum of electronic and thermal Free Energies= -  
3305.347955

Lowest energy vibrations = 21.40 29.86 33.62 cm<sup>-1</sup>

0 1

|    |             |             |             |
|----|-------------|-------------|-------------|
| Mg | 1.54578500  | -0.91790000 | -0.75311000 |
| N  | 1.45828900  | -2.64949900 | -1.76271500 |
| C  | 2.42881700  | -3.06854200 | -2.58940400 |
| C  | 3.66885100  | -2.42422100 | -2.74308200 |
| H  | 4.34854700  | -2.89240000 | -3.44376100 |
| C  | 2.18725400  | -4.28429200 | -3.46368300 |
| H  | 1.67191100  | -5.08034100 | -2.92214100 |
| H  | 3.12686300  | -4.67414900 | -3.85842300 |
| H  | 1.54891100  | -4.00943900 | -4.31217100 |
| C  | 0.23950700  | -3.40859800 | -1.66726600 |
| C  | 0.08709000  | -4.33464100 | -0.61130400 |
| C  | -1.10636500 | -5.06181600 | -0.54225300 |
| H  | -1.24480900 | -5.78971300 | 0.24883900  |
| C  | -2.13662400 | -4.84280400 | -1.45241600 |
| H  | -3.06635000 | -5.39427400 | -1.36346800 |
| C  | -1.98400000 | -3.90069000 | -2.46334900 |
| H  | -2.80452500 | -3.71466600 | -3.14721700 |
| C  | -0.79110700 | -3.18444000 | -2.60318100 |
| C  | 1.19596700  | -4.54408400 | 0.41895000  |
| H  | 1.69295700  | -3.57837100 | 0.56646800  |
| C  | 0.66894200  | -5.00025500 | 1.78916700  |
| H  | -0.13689200 | -4.35088700 | 2.14486900  |
| H  | 1.47875300  | -4.97089300 | 2.52297200  |
| H  | 0.28999100  | -6.02819300 | 1.75468800  |
| C  | 2.26869200  | -5.53279000 | -0.08148000 |
| H  | 1.80925800  | -6.49122200 | -0.35074600 |
| H  | 3.00800000  | -5.71636100 | 0.70616400  |
| H  | 2.80067700  | -5.14368300 | -0.95313400 |
| C  | -0.63195800 | -2.16777900 | -3.72899900 |
| H  | 0.43616300  | -1.96266600 | -3.85658000 |
| C  | -1.16283000 | -2.69082000 | -5.07508200 |
| H  | -0.90088900 | -1.99136300 | -5.87634600 |
| H  | -2.25443200 | -2.78643200 | -5.06660700 |
| H  | -0.73917800 | -3.67127500 | -5.31847400 |
| N  | 3.45137000  | -0.50647400 | -1.26072100 |
| C  | 4.15190900  | -1.25539200 | -2.12998600 |
| C  | 5.54345500  | -0.81143800 | -2.54157700 |
| H  | 6.11891000  | -0.43839400 | -1.69234300 |
| H  | 6.09006500  | -1.63179900 | -3.00897600 |
| H  | 5.47779700  | 0.01074300  | -3.26455000 |

|    |             |             |             |
|----|-------------|-------------|-------------|
| C  | 4.07440700  | 0.66287200  | -0.69564400 |
| C  | 4.71586400  | 0.56840700  | 0.55705000  |
| C  | 5.32954000  | 1.71563700  | 1.07435300  |
| H  | 5.84650300  | 1.66100500  | 2.02654600  |
| C  | 5.27380600  | 2.92848500  | 0.39516100  |
| H  | 5.74487800  | 3.80983600  | 0.81769400  |
| C  | 4.61106200  | 3.01162600  | -0.82737400 |
| H  | 4.56651600  | 3.96336200  | -1.34380400 |
| C  | 4.02002200  | 1.88365900  | -1.40341400 |
| C  | 4.78226400  | -0.74852600 | 1.32457400  |
| H  | 4.02284000  | -1.41702500 | 0.90661600  |
| C  | 4.46988300  | -0.57266300 | 2.81977700  |
| H  | 3.50852900  | -0.07151500 | 2.96260100  |
| H  | 4.42261500  | -1.54927400 | 3.30885500  |
| H  | 5.23951500  | 0.01866700  | 3.32819900  |
| C  | 6.15052900  | -1.43559000 | 1.14386000  |
| H  | 6.95859800  | -0.78309300 | 1.49542800  |
| H  | 6.18629600  | -2.36643200 | 1.72066800  |
| H  | 6.34088200  | -1.68195700 | 0.09521300  |
| C  | 3.33679000  | 1.95978600  | -2.76475000 |
| H  | 3.42486700  | 0.97532900  | -3.23739000 |
| C  | 3.98994600  | 2.97923200  | -3.71215600 |
| H  | 3.56332300  | 2.87659900  | -4.71569900 |
| H  | 3.80448000  | 4.00827300  | -3.38384700 |
| H  | 5.07298100  | 2.82974600  | -3.78009100 |
| C  | 1.83638700  | 2.26269600  | -2.61944700 |
| H  | 1.68796500  | 3.24194400  | -2.15743100 |
| H  | 1.35228000  | 2.26938300  | -3.60278200 |
| H  | 1.31832800  | 1.52971600  | -1.99568700 |
| Mg | -1.24474100 | 0.90536300  | 0.57899200  |
| N  | -3.27789100 | 0.67955200  | 0.38921100  |
| C  | -4.05026900 | 1.49692400  | 1.13040500  |
| C  | -3.63647300 | 2.73751000  | 1.64416900  |
| H  | -4.36281900 | 3.25517200  | 2.25687200  |
| C  | -5.48189800 | 1.09680100  | 1.43123300  |
| H  | -6.01726600 | 0.80729900  | 0.52305100  |
| H  | -6.02247400 | 1.91266500  | 1.91261000  |
| H  | -5.49342900 | 0.23208600  | 2.10259800  |
| C  | -3.92305200 | -0.41415100 | -0.28904900 |
| C  | -4.39981400 | -0.22054700 | -1.61010200 |
| C  | -5.05650400 | -1.28546100 | -2.23760300 |
| H  | -5.43938200 | -1.16224200 | -3.24372000 |
| C  | -5.22403600 | -2.51302800 | -1.59905600 |
| H  | -5.73456000 | -3.32414200 | -2.10795400 |
| C  | -4.72790100 | -2.69555700 | -0.31463500 |
| H  | -4.84428900 | -3.65714400 | 0.17510100  |
| C  | -4.08242500 | -1.65479300 | 0.36141100  |
| C  | -4.17915600 | 1.10436500  | -2.34571400 |
| H  | -3.14829000 | 1.41342500  | -2.12440700 |
| C  | -4.33064800 | 0.98398200  | -3.87293700 |
| H  | -3.74527200 | 0.16178700  | -4.29129800 |
| H  | -3.99677500 | 1.91170400  | -4.34889000 |
| H  | -5.38085400 | 0.83745800  | -4.15286400 |
| C  | -5.11106300 | 2.23935500  | -1.86757000 |
| H  | -6.16102400 | 1.93709700  | -1.96190300 |
| H  | -4.95779400 | 3.12728000  | -2.49316100 |
| H  | -4.91936100 | 2.53183600  | -0.83463000 |
| C  | -3.55378700 | -1.88317800 | 1.77064600  |
| H  | -3.24366500 | -0.91415700 | 2.17076400  |
| C  | -2.32201000 | -2.80341000 | 1.73921800  |
| H  | -2.60231000 | -3.81485500 | 1.42701700  |
| H  | -1.86251700 | -2.86454900 | 2.73370600  |
| H  | -1.57134000 | -2.44493700 | 1.02772700  |
| N  | -1.40900900 | 2.93188300  | 0.71332700  |
| C  | -2.46430300 | 3.45464600  | 1.35549300  |
| C  | -2.43566000 | 4.91319900  | 1.76327200  |
| H  | -2.48310300 | 5.56059800  | 0.88069700  |
| H  | -3.27865800 | 5.15448500  | 2.41221600  |
| H  | -1.50465900 | 5.15575300  | 2.28395900  |

|   |             |             |             |   |             |             |             |
|---|-------------|-------------|-------------|---|-------------|-------------|-------------|
| C | -0.38498900 | 3.81855300  | 0.24248300  | N | -1.46387500 | -1.67261700 | -0.07967100 |
| C | -0.56442500 | 4.48800000  | -0.98733500 | C | -1.26481100 | -2.99976000 | -0.09254100 |
| C | 0.44427000  | 5.34768200  | -1.43351300 | C | 0.00013300  | -3.60671300 | 0.00000000  |
| H | 0.32009200  | 5.87117200  | -2.37661700 | H | 0.00017100  | -4.68923100 | -0.00000500 |
| C | 1.61704500  | 5.52234900  | -0.70105300 | C | 1.26503300  | -2.99967100 | 0.09254100  |
| H | 2.39392600  | 6.18533300  | -1.06751500 | N | 1.46400500  | -1.67251300 | 0.07969200  |
| C | 1.79009600  | 4.83886600  | 0.49948300  | C | -2.46681000 | -3.91221700 | -0.21329100 |
| H | 2.71037400  | 4.96455500  | 1.06116200  | H | -3.16432400 | -3.75173700 | 0.61562300  |
| C | 0.79093400  | 3.99539000  | 0.99752100  | H | -2.16889300 | -4.96124900 | -0.22264100 |
| C | -1.80301100 | 4.24983200  | -1.84387100 | H | -3.01846400 | -3.69453200 | -1.13442500 |
| H | -2.51766900 | 3.66968200  | -1.25134600 | C | 2.46710000  | -3.91204200 | 0.21325900  |
| C | -1.44060300 | 3.40331900  | -3.07882700 | H | 2.16925400  | -4.96109400 | 0.22266200  |
| H | -1.02661400 | 2.43437200  | -2.78011600 | H | 3.01879400  | -3.69428700 | 1.13435200  |
| H | -2.32859800 | 3.22468500  | -3.69487400 | H | 3.16455500  | -3.75154500 | -0.61570300 |
| H | -0.69240200 | 3.91509900  | -3.69564700 | C | -2.80204800 | -1.14410800 | -0.13564400 |
| C | -2.49552800 | 5.55764200  | -2.26288600 | C | -3.51364200 | -0.94923900 | 1.06625600  |
| H | -1.86202700 | 6.15446700  | -2.92930900 | C | -4.77004700 | -0.34258200 | 1.00132800  |
| H | -3.42545300 | 5.33588900  | -2.79873700 | H | -5.33327100 | -0.17348200 | 1.91229100  |
| H | -2.74277900 | 6.17417600  | -1.39230500 | C | -5.30697600 | 0.06647000  | -0.21739900 |
| C | 0.96833900  | 3.29627000  | 2.33731200  | H | -6.27891800 | 0.54656100  | -0.24716100 |
| H | 0.03047900  | 2.77991900  | 2.56699200  | C | -4.59220900 | -0.13188900 | -1.39373500 |
| C | 1.24297500  | 4.29248900  | 3.47846600  | H | -5.01447500 | 0.19797900  | -2.33744700 |
| H | 1.28708800  | 3.76532200  | 4.43793100  | C | -3.33339000 | -0.74234900 | -1.37513600 |
| H | 2.20019300  | 4.80675800  | 3.33413800  | C | -2.89106000 | -1.33420100 | 2.40440800  |
| H | 0.45797400  | 5.05297100  | 3.54228500  | H | -2.18429500 | -2.15248300 | 2.22471100  |
| C | 2.08264700  | 2.24239800  | 2.26494800  | C | -2.08626600 | -0.15470100 | 2.98812400  |
| H | 3.05590400  | 2.70915500  | 2.08751200  | H | -1.28645900 | 0.16784500  | 2.31176800  |
| H | 2.13543600  | 1.68073900  | 3.20494900  | H | -1.62824700 | -0.43452700 | 3.94338100  |
| H | 1.90955200  | 1.53225100  | 1.44966000  | H | -2.73532900 | 0.71244400  | 3.14720800  |
| F | 0.06412300  | 0.21696000  | -0.62068600 | C | -3.92001500 | -1.83767300 | 3.42944500  |
| C | -1.31881900 | -0.84279000 | -3.35426900 | H | -4.57831800 | -1.03179800 | 3.77243100  |
| H | -2.37275900 | -1.02603600 | -3.12620700 | H | -3.40623700 | -2.23687200 | 4.31044000  |
| H | -0.86366200 | -0.39014900 | -2.47008700 | H | -4.54549700 | -2.63081300 | 3.00645700  |
| H | -1.25704100 | -0.12366000 | -4.17986700 | C | -2.54250000 | -0.92219200 | -2.66551300 |
| C | -4.61476000 | -2.46005300 | 2.72552200  | H | -1.71122600 | -1.60482000 | -2.45498900 |
| H | -4.89253900 | -3.48208600 | 2.44293600  | C | -3.38058200 | -1.55864700 | -3.78771000 |
| H | -4.21872300 | -2.49338800 | 3.74658900  | H | -3.83241200 | -2.49955600 | -3.45654500 |
| H | -5.52718300 | -1.85543000 | 2.73161000  | H | -2.74990500 | -1.76652900 | -4.65904100 |
| C | -0.40069900 | -0.14582600 | 2.33705500  | H | -4.18731100 | -0.89329100 | -4.11486900 |
| C | -1.06837200 | -0.04383800 | 3.54958300  | C | -1.94058200 | 0.42056500  | -3.12637600 |
| C | 0.65701000  | -1.01661500 | 2.38682200  | H | -2.73482400 | 1.14032500  | -3.35512500 |
| C | -0.73904300 | -0.76128500 | 4.69269700  | H | -1.32968100 | 0.28381000  | -4.02576600 |
| C | 1.06044800  | -1.77726500 | 3.47279000  | H | -1.31141700 | 0.86995300  | -2.34870500 |
| C | 0.33816700  | -1.64131800 | 4.64976100  | C | 2.80214500  | -1.14391700 | 0.13564200  |
| F | -2.16325300 | 0.80706200  | 3.64538600  | C | 3.51370900  | -0.94900500 | -1.06626900 |
| F | -1.44966800 | -0.62573200 | 5.85735700  | C | 4.77008600  | -0.34228500 | -1.00135600 |
| F | 0.68719200  | -2.36445500 | 5.75953300  | H | 5.33329000  | -0.17315300 | -1.91232600 |
| F | 2.12270100  | -2.64490400 | 3.40780100  | C | 5.30700900  | 0.06679300  | 0.21736400  |
| F | 1.47296900  | -1.22155200 | 1.21254700  | H | 6.27892600  | 0.54693500  | 0.24711400  |
|   |             |             |             | C | 4.59227300  | -0.13161500 | 1.39371100  |
|   |             |             |             | H | 5.01453900  | 0.19826700  | 2.33741800  |
|   |             |             |             | C | 3.33348900  | -0.74214600 | 1.37512900  |
|   |             |             |             | C | 2.89113100  | -1.33401000 | -2.40441100 |
|   |             |             |             | H | 2.18437600  | -2.15229600 | -2.22469100 |
|   |             |             |             | C | 3.92009000  | -1.83749900 | -3.42943700 |
|   |             |             |             | H | 4.57837500  | -1.03162400 | -3.77245800 |
|   |             |             |             | H | 3.40631300  | -2.23674000 | -4.31041400 |
|   |             |             |             | H | 4.54558900  | -2.63061100 | -3.00642300 |
|   |             |             |             | C | 2.08632600  | -0.15453500 | -2.98816200 |
|   |             |             |             | H | 1.28649900  | 0.16800800  | -2.31182900 |
|   |             |             |             | H | 1.62832800  | -0.43438700 | -3.94342200 |
|   |             |             |             | H | 2.73537400  | 0.71262000  | -3.14725200 |
|   |             |             |             | C | 2.54263800  | -0.92206900 | 2.66551800  |

**[Mg]-C<sub>6</sub>F<sub>5</sub>  
wB97XD  
6,31G+(d,p) / Lanl2DZ**

Sum of electronic and zero-point Energies=  
-1966.321510

Sum of electronic and thermal Energies=  
-1966.276745

Sum of electronic and thermal Enthalpies=  
-1966.275801

Sum of electronic and thermal Free Energies=  
-1966.401948

Lowest energy vibrations = 9.27 13.92 27.27 cm<sup>-1</sup>

|     |            |             |            |
|-----|------------|-------------|------------|
| 0 1 |            |             |            |
| Mg  | 0.00001400 | -0.31826500 | 0.00003000 |

|   |             |             |             |
|---|-------------|-------------|-------------|
| H | 1.71142900  | -1.60478000 | 2.45500500  |
| C | 1.94059000  | 0.42062600  | 3.12639600  |
| H | 2.73476300  | 1.14047100  | 3.35511600  |
| H | 1.32973200  | 0.28380800  | 4.02580500  |
| H | 1.31135200  | 0.86994700  | 2.34874500  |
| C | 3.38079800  | -1.55844300 | 3.78770300  |
| H | 3.83272000  | -2.49930500 | 3.45652900  |
| H | 2.75015300  | -1.76639200 | 4.65904100  |
| H | 4.18746300  | -0.89300600 | 4.11485500  |
| C | -0.00008800 | 1.79877400  | 0.00002800  |
| C | 1.14252500  | 2.54830700  | -0.24469100 |
| F | 2.34125700  | 1.89669000  | -0.49674800 |
| C | 1.17440300  | 3.93721700  | -0.25132100 |
| F | 2.33461300  | 4.62697900  | -0.49969400 |
| C | -0.00020900 | 4.63388600  | 0.00000200  |
| C | -1.17476200 | 3.93712000  | 0.25133500  |
| F | -2.33503200 | 4.62678800  | 0.49968900  |
| C | -1.14276600 | 2.54821300  | 0.24473200  |
| F | -2.34144400 | 1.89649800  | 0.49678900  |
| F | -0.00026800 | 6.00410000  | -0.00001300 |

**[Mg]-C<sub>6</sub>F<sub>5</sub>(THF)  
wB97XD  
6,31G+(d,p) / Lanl2DZ**

Sum of electronic and zero-point Energies=  
-2198.571855

Sum of electronic and thermal Energies=  
-2198.521870

Sum of electronic and thermal Enthalpies=  
-2198.520926

Sum of electronic and thermal Free Energies=  
-2198.654398

Lowest energy vibrations = 33.86 41.47 48.83 cm<sup>-1</sup>

0 1

|    |             |             |             |
|----|-------------|-------------|-------------|
| Mg | -0.15934100 | -0.46633900 | -0.27577100 |
| N  | -1.92057100 | -0.86498300 | 0.65468200  |
| C  | -2.01769400 | -1.88225500 | 1.53235900  |
| C  | -0.92137500 | -2.49464500 | 2.15908100  |
| H  | -1.16383600 | -3.29020300 | 2.85353100  |
| C  | 0.43778900  | -2.09708400 | 2.14876500  |
| N  | 0.94288600  | -1.23360400 | 1.27002000  |
| C  | -3.39492300 | -2.41478700 | 1.88480700  |
| H  | -4.05517300 | -1.62024300 | 2.24216400  |
| H  | -3.33654700 | -3.19252400 | 2.64774600  |
| H  | -3.86888100 | -2.83600300 | 0.99061200  |
| C  | 1.32497300  | -2.71569400 | 3.21225400  |
| H  | 0.73921500  | -2.99314000 | 4.09061700  |
| H  | 2.11775200  | -2.02799500 | 3.51624000  |
| H  | 1.80697800  | -3.62185700 | 2.82728400  |
| C  | -3.09485300 | -0.07905200 | 0.38531100  |
| C  | -3.41102200 | 0.98244300  | 1.26402700  |
| C  | -4.57064800 | 1.72438700  | 1.02390200  |
| H  | -4.83515800 | 2.53360100  | 1.69646900  |
| C  | -5.38495800 | 1.45549800  | -0.07383000 |
| H  | -6.27974600 | 2.04411000  | -0.24498400 |
| C  | -5.03238200 | 0.44510600  | -0.96159500 |
| H  | -5.65151100 | 0.25789600  | -1.83389400 |
| C  | -3.88962400 | -0.33343700 | -0.74801800 |
| C  | -2.49961700 | 1.33163700  | 2.43695500  |
| H  | -1.53805900 | 0.84105500  | 2.25250100  |
| C  | -2.24297800 | 2.84548900  | 2.53888100  |
| H  | -1.88714600 | 3.24487900  | 1.58608400  |
| H  | -1.48920200 | 3.04550400  | 3.30915200  |

|   |             |             |             |
|---|-------------|-------------|-------------|
| H | -3.14980900 | 3.39111200  | 2.82434300  |
| C | -3.03956400 | 0.78745100  | 3.77385800  |
| H | -4.03747100 | 1.19238400  | 3.98097400  |
| H | -2.37503900 | 1.07790800  | 4.59582600  |
| H | -3.10445500 | -0.30465800 | 3.76662200  |
| C | -3.49414100 | -1.39265500 | -1.76600100 |
| H | -2.63716600 | -1.93234100 | -1.35252100 |
| C | -4.61160800 | -2.41410800 | -2.03589500 |
| H | -4.94181700 | -2.89570200 | -1.10983000 |
| H | -4.26112800 | -3.19310700 | -2.72380800 |
| H | -5.48529000 | -1.93707400 | -2.49395000 |
| C | -3.03736500 | -0.71804300 | -3.07339500 |
| H | -3.86817500 | -0.17801300 | -3.54145100 |
| H | -2.67084800 | -1.46181500 | -3.79217000 |
| H | -2.24198600 | 0.00920200  | -2.87523000 |
| C | 2.30376100  | -0.78061600 | 1.33996000  |
| C | 3.36418100  | -1.58863100 | 0.88182800  |
| C | 4.65986000  | -1.06067100 | 0.88445800  |
| H | 5.48382000  | -1.66890600 | 0.52463300  |
| C | 4.90741600  | 0.23542300  | 1.31976900  |
| H | 5.91657600  | 0.63229700  | 1.30722500  |
| C | 3.85086900  | 1.03024200  | 1.75681600  |
| H | 4.04989800  | 2.04530100  | 2.08020300  |
| C | 2.54037900  | 0.54519600  | 1.77153500  |
| C | 3.13219600  | -2.98643800 | 0.32158700  |
| H | 2.09173000  | -3.26112000 | 0.52362500  |
| C | 4.03373800  | -4.04442200 | 0.98227400  |
| H | 5.08828300  | -3.87696400 | 0.73709800  |
| H | 3.76720400  | -5.04714500 | 0.62898100  |
| H | 3.93848400  | -4.02420200 | 2.07276600  |
| C | 3.31948700  | -2.98660300 | -1.20757100 |
| H | 2.66066000  | -2.24600800 | -1.66596900 |
| H | 3.10150200  | -3.97738900 | -1.62644000 |
| H | 4.34992100  | -2.72492800 | -1.47175600 |
| C | 1.39193000  | 1.41813000  | 2.26390000  |
| H | 0.50203600  | 1.15525700  | 1.68096600  |
| C | 1.63213300  | 2.91924400  | 2.04908600  |
| H | 2.39017100  | 3.31379500  | 2.73547500  |
| H | 0.70459000  | 3.47220000  | 2.22799400  |
| H | 1.95782900  | 3.12145100  | 1.02348100  |
| C | 1.06391200  | 1.11630400  | 3.73913600  |
| H | 0.75995600  | 0.07326600  | 3.87184200  |
| H | 0.24283000  | 1.75316000  | 4.08732000  |
| H | 1.93890400  | 1.30609400  | 4.37163200  |
| C | 0.56164700  | 1.34975200  | -1.15123200 |
| C | 1.86249900  | 1.44486500  | -1.61585800 |
| F | 2.63056600  | 0.28351700  | -1.73155400 |
| C | 2.47832800  | 2.63432000  | -1.98353000 |
| F | 3.77582300  | 2.66984800  | -2.43271400 |
| C | 1.74767900  | 3.81337700  | -1.89655000 |
| C | 0.43183200  | 3.77922900  | -1.45174300 |
| F | -0.28840400 | 4.94574800  | -1.36799700 |
| C | -0.11888100 | 2.55376800  | -1.09856600 |
| F | -1.43751000 | 2.56637700  | -0.65129800 |
| O | 0.01174900  | -1.85455200 | -1.72276800 |
| C | -0.25805700 | -3.27843700 | -1.46868400 |
| H | -1.06026800 | -3.32778300 | -0.73148800 |
| H | 0.64773700  | -3.73059200 | -1.05688600 |
| C | -0.60406300 | -3.82472600 | -2.84759000 |
| H | -1.64991800 | -3.60597500 | -3.08926800 |
| H | -0.45098800 | -4.90390800 | -2.91689300 |
| C | 0.34764300  | -3.03386200 | -3.76880900 |
| H | 1.34099100  | -3.49385300 | -3.76579400 |
| H | -0.00793700 | -2.99476700 | -4.80076400 |
| C | 0.40234300  | -1.64020200 | -3.13391100 |
| H | 1.39141200  | -1.18395400 | -3.13586300 |
| H | -0.32427800 | -0.94966200 | -3.56210100 |
| F | 2.32176800  | 5.00573300  | -2.25760400 |

**[Mg]-F/F-[Mg]  
wB97XD  
6,31G+(d,p) / Lan12DZ**

Sum of electronic and zero-point Energies=  
-2677.728356

Sum of electronic and thermal Energies=  
-2677.657152

Sum of electronic and thermal Enthalpies=  
-2677.656208

Sum of electronic and thermal Free Energies=  
-2677.830706

Lowest energy vibrations = 23.29 31.28 43.22 cm<sup>-1</sup>

0 1

|    |             |            |             |
|----|-------------|------------|-------------|
| Mg | 0.04896500  | 1.43488800 | 0.48089600  |
| F  | -0.03056900 | 0.42713500 | -1.16513600 |
| N  | -1.38453000 | 2.85900900 | 0.81195400  |
| C  | -1.16579500 | 3.93290000 | 1.59041900  |
| C  | 0.06897600  | 4.24600600 | 2.18345500  |
| H  | 0.06137800  | 5.09643400 | 2.85253500  |
| C  | -2.28526200 | 4.93107800 | 1.83138300  |
| H  | -2.65093300 | 5.33492800 | 0.88184700  |
| H  | -1.93727700 | 5.75875000 | 2.45027800  |
| H  | -3.14456900 | 4.46545300 | 2.32310100  |
| C  | -2.66664800 | 2.80128100 | 0.15404000  |
| C  | -2.78481300 | 3.30053300 | -1.15741800 |
| C  | -4.05806000 | 3.35780800 | -1.73848100 |
| H  | -4.16905900 | 3.76159100 | -2.74004500 |
| C  | -5.17903100 | 2.90264700 | -1.05401700 |
| H  | -6.15847200 | 2.95450100 | -1.51741000 |
| C  | -5.03937800 | 2.36253200 | 0.22437400  |
| H  | -5.91732200 | 1.99338500 | 0.74145100  |
| C  | -3.79161400 | 2.31056500 | 0.85282600  |
| C  | -1.57456500 | 3.79120000 | -1.94429200 |
| H  | -0.68109100 | 3.60694000 | -1.33785100 |
| C  | -1.41541100 | 3.00678600 | -3.25966500 |
| H  | -1.21272700 | 1.95252800 | -3.05120600 |
| H  | -0.58176900 | 3.40651900 | -3.84579600 |
| H  | -2.31978300 | 3.07275000 | -3.87527000 |
| C  | -1.64237700 | 5.30838100 | -2.19860200 |
| H  | -2.51206400 | 5.56817500 | -2.81357900 |
| H  | -0.74223600 | 5.64614300 | -2.72519800 |
| H  | -1.71352900 | 5.86306200 | -1.25692300 |
| C  | -3.63466200 | 1.73369500 | 2.25533500  |
| H  | -2.85813600 | 2.30764400 | 2.77375100  |
| C  | -4.91508100 | 1.82137700 | 3.10011400  |
| H  | -4.69201200 | 1.54883000 | 4.13699500  |
| H  | -5.68026400 | 1.12452500 | 2.73835200  |
| H  | -5.33841100 | 2.83202300 | 3.09401400  |
| N  | 1.55927600  | 2.67081800 | 1.08297100  |
| C  | 1.33632800  | 3.72636700 | 1.88649100  |
| C  | 2.51924800  | 4.47929800 | 2.46272800  |
| H  | 3.07448900  | 4.98825700 | 1.66719200  |
| H  | 2.19065200  | 5.22658000 | 3.18607700  |
| H  | 3.22108700  | 3.79870100 | 2.95182300  |
| C  | 2.91760700  | 2.44663800 | 0.65729600  |
| C  | 3.40251200  | 3.14580000 | -0.46988500 |
| C  | 4.71108800  | 2.89921300 | -0.89563800 |
| H  | 5.09902400  | 3.42345700 | -1.76330500 |
| C  | 5.52047400  | 1.97855000 | -0.23307800 |
| H  | 6.52787200  | 1.78652300 | -0.58740300 |
| C  | 5.03791700  | 1.31786900 | 0.89226400  |
| H  | 5.67520700  | 0.61239700 | 1.41551100  |
| C  | 3.74677200  | 1.56258200 | 1.37367000  |
| C  | 2.53092000  | 4.15530800 | -1.20926300 |

|    |             |             |             |
|----|-------------|-------------|-------------|
| H  | 1.65792200  | 4.36906100  | -0.58364200 |
| C  | 2.00892900  | 3.57120100  | -2.53344000 |
| H  | 1.40180800  | 2.67691100  | -2.36114200 |
| H  | 1.39196500  | 4.31062400  | -3.05679900 |
| H  | 2.84165300  | 3.29293300  | -3.18989900 |
| C  | 3.25767800  | 5.48953700  | -1.45500500 |
| H  | 4.07617500  | 5.37660500  | -2.17503500 |
| H  | 2.55741200  | 6.22642500  | -1.86401700 |
| H  | 3.67776300  | 5.89323500  | -0.52763800 |
| C  | 3.27998700  | 0.92600100  | 2.67544900  |
| H  | 2.32859900  | 1.39320200  | 2.95040300  |
| C  | 4.27543400  | 1.17628500  | 3.82442900  |
| H  | 3.86236300  | 0.79636500  | 4.76541300  |
| H  | 5.22582600  | 0.66028100  | 3.64634500  |
| H  | 4.49170200  | 2.24272100  | 3.95027500  |
| C  | 3.02852200  | -0.57629200 | 2.50390000  |
| H  | 3.94609900  | -1.09386400 | 2.21073700  |
| H  | 2.67070200  | -1.01258000 | 3.44306000  |
| H  | 2.27320900  | -0.76258900 | 1.73687600  |
| Mg | -0.10852900 | -1.39925600 | -0.50352500 |
| N  | -1.67127200 | -2.69307000 | -0.80293400 |
| C  | -1.56731500 | -3.75799800 | -1.61666800 |
| C  | -0.37414500 | -4.17206500 | -2.23521600 |
| H  | -0.47092600 | -4.99772500 | -2.92798800 |
| C  | -2.78112300 | -4.63568800 | -1.87623700 |
| H  | -3.23351300 | -4.96088200 | -0.93471900 |
| H  | -2.50008700 | -5.51932900 | -2.45038200 |
| H  | -3.55747900 | -4.09713200 | -2.42821800 |
| C  | -2.93059900 | -2.52713000 | -0.12220400 |
| C  | -3.05379400 | -3.00007000 | 1.20088000  |
| C  | -4.31223400 | -2.94450300 | 1.81135900  |
| H  | -4.43606800 | -3.31792000 | 2.82141600  |
| C  | -5.40676100 | -2.39802700 | 1.14814000  |
| H  | -6.37410200 | -2.35918600 | 1.63760200  |
| C  | -5.25448000 | -1.87958400 | -0.13616900 |
| H  | -6.10908400 | -1.43576000 | -0.63339300 |
| C  | -4.02286000 | -1.94213000 | -0.79636200 |
| C  | -1.84914200 | -3.57331700 | 1.94220800  |
| H  | -0.95948600 | -3.05299000 | 1.56803200  |
| C  | -1.91152400 | -3.32521500 | 3.45743000  |
| H  | -2.10677900 | -2.27090300 | 3.67475000  |
| H  | -0.95668200 | -3.59655700 | 3.91769400  |
| H  | -2.68990000 | -3.93004100 | 3.93701300  |
| C  | -1.65865400 | -5.07485300 | 1.64819800  |
| H  | -2.56472000 | -5.63396800 | 1.91091700  |
| H  | -0.82664500 | -5.47610200 | 2.23835800  |
| H  | -1.43349300 | -5.25202900 | 0.59231200  |
| C  | -3.84973600 | -1.37506700 | -2.20089900 |
| H  | -3.12768000 | -2.00032600 | -2.73688100 |
| C  | -3.25976400 | 0.04134100  | -2.12593100 |
| H  | -3.91444600 | 0.68650400  | -1.53749200 |
| H  | -3.16284500 | 0.47358900  | -3.12806100 |
| H  | -2.26892200 | 0.05150500  | -1.66483800 |
| N  | 1.26372800  | -2.77028500 | -1.11699000 |
| C  | 0.93992500  | -3.78463100 | -1.93864100 |
| C  | 2.04493000  | -4.62371500 | -2.55004400 |
| H  | 2.63669200  | -5.11651700 | -1.77249300 |
| H  | 1.63529200  | -5.38763600 | -3.21200600 |
| H  | 2.73605200  | -3.99806100 | -3.12317900 |
| C  | 2.62764000  | -2.70091500 | -0.65994900 |
| C  | 2.99259900  | -3.42860800 | 0.49326800  |
| C  | 4.31703800  | -3.35484000 | 0.93616900  |
| H  | 4.61579100  | -3.91110300 | 1.81970100  |
| C  | 5.25298100  | -2.56376400 | 0.27454900  |
| H  | 6.27193000  | -2.50348600 | 0.64267700  |
| C  | 4.87873300  | -1.85469100 | -0.86342200 |
| H  | 5.61136600  | -1.24262200 | -1.37890700 |
| C  | 3.57532300  | -1.93416800 | -1.36546400 |
| C  | 1.98724100  | -4.29796400 | 1.24290500  |

|   |             |             |             |
|---|-------------|-------------|-------------|
| H | 1.03709600  | -4.25855100 | 0.70029100  |
| C | 1.72853800  | -3.76323600 | 2.66297800  |
| H | 1.25480900  | -2.77761600 | 2.63085500  |
| H | 1.06897400  | -4.44576000 | 3.21063700  |
| H | 2.66326700  | -3.67228200 | 3.22815400  |
| C | 2.43226900  | -5.77153100 | 1.29069900  |
| H | 3.35569600  | -5.89013100 | 1.86921000  |
| H | 1.65711200  | -6.38412900 | 1.76506600  |
| H | 2.61072100  | -6.16793000 | 0.28588200  |
| C | 3.20292800  | -1.23281600 | -2.66397100 |
| H | 2.23570600  | -1.63137800 | -2.98863600 |
| C | 4.22174300  | -1.50374700 | -3.78608700 |
| H | 3.85285800  | -1.09195800 | -4.73194300 |
| H | 5.18596400  | -1.02823600 | -3.57333100 |
| H | 4.39899600  | -2.57620600 | -3.92238200 |
| C | 3.03183100  | 0.27606900  | -2.44765500 |
| H | 3.96853800  | 0.72708200  | -2.10946300 |
| H | 2.72700800  | 0.76465600  | -3.37980700 |
| H | 2.26490400  | 0.48266800  | -1.69747800 |
| F | 0.00009000  | -0.39260300 | 1.13638700  |
| C | -3.15587400 | 0.27506600  | 2.17579900  |
| H | -3.86385800 | -0.31591000 | 1.59170000  |
| H | -2.17055800 | 0.18431200  | 1.71254300  |
| H | -3.08963000 | -0.16213500 | 3.17877100  |
| C | -5.14789900 | -1.36711400 | -3.02260300 |
| H | -5.85666200 | -0.62106800 | -2.64462600 |
| H | -4.92463300 | -1.10521600 | -4.06217100 |
| H | -5.64022400 | -2.34603400 | -3.01246100 |

**[Mg]-F/F-[Mg] (THF)<sub>2</sub>  
wB97XD  
6,31G+(d,p) / Lanl2DZ**

Sum of electronic and zero-point Energies=  
-3142.204316

Sum of electronic and thermal Energies=  
-3142.123297

Sum of electronic and thermal Enthalpies=  
-3142.122353

Sum of electronic and thermal Free Energies=  
-3142.313204

Lowest energy vibrations = 35.92 48.11 53.70 cm<sup>-1</sup>

|     |             |             |             |
|-----|-------------|-------------|-------------|
| 0 1 |             |             |             |
| Mg  | -1.27766000 | 0.55082300  | 0.69802500  |
| F   | -0.52483700 | -1.07487400 | -0.09054300 |
| N   | -3.25848200 | -0.16868200 | 0.83840400  |
| C   | -4.17192300 | 0.46884200  | 1.58385100  |
| C   | -4.06280100 | 1.81131000  | 1.98803600  |
| H   | -4.85893600 | 2.17681200  | 2.62434700  |
| C   | -5.42952200 | -0.25760700 | 2.03210600  |
| H   | -5.93963400 | -0.73001500 | 1.18806200  |
| H   | -6.12282500 | 0.42915100  | 2.52018900  |
| H   | -5.17884100 | -1.05682400 | 2.73754800  |
| C   | -3.63665700 | -1.45955500 | 0.32645100  |
| C   | -4.22360400 | -1.53244000 | -0.95564400 |
| C   | -4.69131300 | -2.76874900 | -1.41207600 |
| H   | -5.16418800 | -2.83992600 | -2.38562100 |
| C   | -4.54328900 | -3.92027100 | -0.64271900 |
| H   | -4.90588400 | -4.87290700 | -1.01480800 |
| C   | -3.90952800 | -3.84621200 | 0.59373600  |
| H   | -3.76903800 | -4.74978000 | 1.17812900  |
| C   | -3.46471200 | -2.62215100 | 1.10295600  |
| C   | -4.36330700 | -0.27794400 | -1.81023100 |
| H   | -3.52996100 | 0.38012600  | -1.53540800 |
| C   | -4.27248700 | -0.56471100 | -3.31777600 |
| H   | -3.42094300 | -1.21140000 | -3.55302300 |

|    |             |             |             |
|----|-------------|-------------|-------------|
| H  | -4.16231900 | 0.37752700  | -3.86731900 |
| H  | -5.18008900 | -1.05338500 | -3.69066700 |
| C  | -5.66690800 | 0.48835400  | -1.50617600 |
| H  | -6.53005400 | -0.18349700 | -1.58534200 |
| H  | -5.80349500 | 1.30483300  | -2.22413100 |
| H  | -5.65167600 | 0.92570900  | -0.50454600 |
| C  | -2.79841600 | -2.55097300 | 2.46744300  |
| H  | -2.78701400 | -1.49742000 | 2.75919500  |
| C  | -3.55115000 | -3.33736700 | 3.55389700  |
| H  | -3.09666600 | -3.15075100 | 4.53415600  |
| H  | -3.50005700 | -4.41690200 | 3.37170100  |
| H  | -4.60868900 | -3.05542400 | 3.60489000  |
| C  | -1.33827500 | -3.01694400 | 2.36970700  |
| H  | -1.28829400 | -4.08639400 | 2.14492200  |
| H  | -0.81919300 | -2.84655400 | 3.32293400  |
| H  | -0.82070900 | -2.48376200 | 1.56785900  |
| N  | -2.06729800 | 2.50544300  | 0.79289000  |
| C  | -3.15173700 | 2.77972300  | 1.53314500  |
| C  | -3.45650100 | 4.21377000  | 1.93390600  |
| H  | -3.43776000 | 4.88574700  | 1.07183800  |
| H  | -4.43484400 | 4.28496800  | 2.41177800  |
| H  | -2.70078900 | 4.58098400  | 2.63525100  |
| C  | -1.37136200 | 3.63386700  | 0.23420500  |
| C  | -1.74503100 | 4.08542000  | -1.05118400 |
| C  | -1.15240700 | 5.24681100  | -1.55609300 |
| H  | -1.44509400 | 5.61981700  | -2.53204100 |
| C  | -0.17650000 | 5.92696700  | -0.83122800 |
| H  | 0.27905800  | 6.82319400  | -1.23932000 |
| C  | 0.22524600  | 5.43921900  | 0.40825600  |
| H  | 1.00695900  | 5.95369900  | 0.95862300  |
| C  | -0.37122800 | 4.30327100  | 0.96616000  |
| C  | -2.80026200 | 3.33743100  | -1.85842700 |
| H  | -2.77998300 | 2.29681400  | -1.51352600 |
| C  | -2.51422000 | 3.35129800  | -3.36972500 |
| H  | -1.46526200 | 3.12167700  | -3.57992200 |
| H  | -3.14360400 | 2.61058500  | -3.87687100 |
| H  | -2.73882000 | 4.32842800  | -3.81292200 |
| C  | -4.22079500 | 3.87556100  | -1.59109700 |
| H  | -4.25112500 | 4.96187000  | -1.73865400 |
| H  | -4.93787700 | 3.41832100  | -2.28209900 |
| H  | -4.55076900 | 3.65048800  | -0.57338400 |
| C  | 0.07661700  | 3.80917000  | 2.33401000  |
| H  | -0.60438400 | 3.00476700  | 2.62738900  |
| C  | 0.02649700  | 4.90314800  | 3.41612000  |
| H  | 0.25691900  | 4.47129600  | 4.39759200  |
| H  | 0.76878300  | 5.68538200  | 3.21961100  |
| H  | -0.95535100 | 5.38382200  | 3.47636900  |
| C  | 1.48970100  | 3.21718400  | 2.23832100  |
| H  | 2.21716500  | 3.99163200  | 1.97832900  |
| H  | 1.79541400  | 2.78397200  | 3.20019600  |
| H  | 1.52438100  | 2.44918100  | 1.46173100  |
| O  | -0.64329900 | 0.25599900  | 2.60729600  |
| Mg | 1.27688500  | -0.55384400 | -0.69967000 |
| N  | 2.06754100  | -2.50874000 | -0.78249100 |
| C  | 3.15193100  | -2.78561700 | -1.52181700 |
| C  | 4.05992000  | -1.81853200 | -1.98601700 |
| H  | 4.85502200  | -2.18704200 | -2.62190300 |
| C  | 3.46204700  | -4.22228800 | -1.90886800 |
| H  | 3.45023500  | -4.88426600 | -1.03885600 |
| H  | 4.43900600  | -4.29372900 | -2.38949600 |
| H  | 2.70571800  | -4.60162900 | -2.60295000 |
| C  | 1.37151800  | -3.63536100 | -0.22026600 |
| C  | 1.73788400  | -4.07737600 | 1.07049800  |
| C  | 1.14666900  | -5.23835800 | 1.57811900  |
| H  | 1.43327000  | -5.60380300 | 2.55865200  |
| C  | 0.17862500  | -5.92695900 | 0.85065400  |
| H  | -0.27581700 | -6.82274400 | 1.26092700  |
| C  | -0.21755000 | -5.44754800 | -0.39384000 |
| H  | -0.99413600 | -5.96790100 | -0.94593600 |

|   |             |             |             |
|---|-------------|-------------|-------------|
| C | 0.37775000  | -4.31220300 | -0.95419200 |
| C | 2.78049400  | -3.31674100 | 1.88237900  |
| H | 2.74157500  | -2.27430400 | 1.54426100  |
| C | 2.49478200  | -3.34471700 | 3.39351100  |
| H | 1.44156300  | -3.13649200 | 3.60518800  |
| H | 3.10962500  | -2.59480000 | 3.90487100  |
| H | 2.73863700  | -4.31980500 | 3.83094400  |
| C | 4.21119000  | -3.82579400 | 1.61316500  |
| H | 4.26276500  | -4.91194900 | 1.75570500  |
| H | 4.91811000  | -3.35778800 | 2.30748600  |
| H | 4.53819400  | -3.58913000 | 0.59718300  |
| C | -0.06616300 | -3.82538300 | -2.32602000 |
| H | 0.61577400  | -3.02280500 | -2.62206800 |
| C | -0.01411000 | -4.92449200 | -3.40274600 |
| H | -0.24177600 | -4.49680400 | -4.38666200 |
| H | -0.75738600 | -5.70538300 | -3.20469000 |
| H | 0.96762900  | -5.40598300 | -3.45842700 |
| C | -1.47921600 | -3.23190500 | -2.23626000 |
| H | -2.20759000 | -4.00469600 | -1.97385100 |
| H | -1.78252900 | -2.80333000 | -3.20097700 |
| H | -1.51508800 | -2.46004100 | -1.46351600 |
| N | 3.25638500  | 0.16678300  | -0.84595800 |
| C | 4.16776000  | -0.47316100 | -1.59173600 |
| C | 5.41998100  | 0.25419700  | -2.05329500 |
| H | 5.92922100  | 0.74319000  | -1.21838900 |
| H | 6.11648200  | -0.43537000 | -2.53284000 |
| H | 5.16193100  | 1.04050400  | -2.77047700 |
| C | 3.63466200  | 1.45933900  | -0.33892300 |
| C | 4.23284300  | 1.53463000  | 0.93789300  |
| C | 4.69850800  | 2.77292500  | 1.39078600  |
| H | 5.17947600  | 2.84555000  | 2.36034300  |
| C | 4.53822300  | 3.92402100  | 0.62316600  |
| H | 4.89927200  | 4.87832600  | 0.99250200  |
| C | 3.89456400  | 3.84720000  | -0.60802700 |
| H | 3.74462700  | 4.75023100  | -1.19103100 |
| C | 3.45100900  | 2.62117400  | -1.11380600 |
| C | 4.38938600  | 0.28041800  | 1.78996500  |
| H | 3.56787100  | -0.39067700 | 1.51147500  |
| C | 4.28919400  | 0.56275900  | 3.29782000  |
| H | 3.42847600  | 1.19803200  | 3.53043800  |
| H | 4.18869200  | -0.38190600 | 3.84518200  |
| H | 5.18877200  | 1.06250500  | 3.67545500  |
| C | 5.70706300  | -0.46241600 | 1.48759400  |
| H | 6.55775600  | 0.22492700  | 1.56870800  |
| H | 5.85749700  | -1.27717200 | 2.20464100  |
| H | 5.70143500  | -0.89859800 | 0.48529900  |
| C | 2.77432400  | 2.54788400  | -2.47301400 |
| H | 2.74903600  | 1.49251500  | -2.75659100 |
| C | 3.52895100  | 3.31860500  | -3.56953300 |
| H | 3.06449600  | 3.13331700  | -4.54541400 |
| H | 3.49377500  | 4.39958800  | -3.39200900 |
| H | 4.58223300  | 3.02260800  | -3.62732100 |
| C | 1.32036900  | 3.03151100  | -2.37009000 |
| H | 1.28395300  | 4.10399900  | -2.15733400 |
| H | 0.79264100  | 2.85682700  | -3.31774400 |
| H | 0.80200400  | 2.51395300  | -1.55857200 |
| F | 0.52241900  | 1.07352900  | 0.08545800  |
| C | -1.31657900 | 0.61915000  | 3.85893100  |
| C | 0.72319500  | -0.23603400 | 2.87088700  |
| C | -0.17320000 | 0.79051800  | 4.85317400  |
| H | -1.90241800 | 1.51769000  | 3.66573900  |
| H | -1.98854000 | -0.19802200 | 4.13990100  |
| C | 0.82717200  | -0.28782100 | 4.39477200  |
| H | 0.81595100  | -1.20877900 | 2.38677400  |
| H | 1.41343400  | 0.47827600  | 2.42066100  |
| H | -0.49769200 | 0.65279900  | 5.88713000  |
| H | 0.26768400  | 1.78851400  | 4.75494900  |
| H | 0.51896300  | -1.27042400 | 4.76832000  |
| H | 1.84484900  | -0.09654200 | 4.73973500  |

|   |             |             |             |
|---|-------------|-------------|-------------|
| O | 0.64654300  | -0.26784600 | -2.61103800 |
| C | 1.31866700  | -0.63185900 | -3.86310500 |
| C | -0.71896700 | 0.22790600  | -2.87336100 |
| C | 0.17607400  | -0.78581000 | -4.86130000 |
| H | 1.99999500  | 0.17954500  | -4.13809500 |
| H | 1.89475300  | -1.53746700 | -3.67370000 |
| C | -0.81663200 | 0.29695500  | -4.39662800 |
| H | -1.41092000 | -0.49145200 | -2.43416400 |
| H | -0.81238000 | 1.19481800  | -2.37747700 |
| H | -0.27353200 | -1.78078100 | -4.77229200 |
| H | 0.50431400  | -0.64266300 | -5.89333000 |
| H | -1.83446200 | 0.11820700  | -4.74767400 |
| H | -0.49765900 | 1.28056100  | -4.75855700 |

**[Mg]-C<sub>6</sub>F<sub>5</sub>/C<sub>6</sub>F<sub>5</sub>-[Mg]  
wB97XD  
6,31G+(d,p) / Lanl2DZ**

Sum of electronic and zero-point Energies=  
-3932.706595

Sum of electronic and thermal Energies=  
-3932.618671

Sum of electronic and thermal Enthalpies=  
-3932.617726

Sum of electronic and thermal Free Energies=  
-3932.827056

Lowest energy vibrations = 23.50 28.96 34.17 cm<sup>-1</sup>

|     |             |             |             |
|-----|-------------|-------------|-------------|
| 0 1 |             |             |             |
| Mg  | -2.43515700 | -0.22938800 | 0.44263300  |
| N   | -3.25235700 | -1.27654600 | 1.97805200  |
| C   | -4.54527600 | -1.61344200 | 1.94836500  |
| C   | -5.44208400 | -1.25359900 | 0.91808300  |
| H   | -6.46496400 | -1.56108000 | 1.10079900  |
| C   | -5.15674100 | -2.45164000 | 3.05726200  |
| H   | -4.50769500 | -2.53204300 | 3.92913200  |
| H   | -5.35030300 | -3.46113700 | 2.67792100  |
| H   | -6.11710400 | -2.03115200 | 3.36777500  |
| C   | -2.43541900 | -1.59023200 | 3.12653300  |
| C   | -1.68568800 | -2.78499400 | 3.16620500  |
| C   | -0.91077200 | -3.05792600 | 4.29985800  |
| H   | -0.34268700 | -3.98129700 | 4.34445300  |
| C   | -0.85829200 | -2.17165500 | 5.36891900  |
| H   | -0.25690900 | -2.40253900 | 6.24151800  |
| C   | -1.57690900 | -0.98212900 | 5.30770300  |
| H   | -1.52645500 | -0.28539100 | 6.13760000  |
| C   | -2.36508800 | -0.66646200 | 4.19610000  |
| C   | -1.70480900 | -3.78969300 | 2.02408200  |
| H   | -2.20790900 | -3.32157000 | 1.17437000  |
| C   | -0.27794800 | -4.16602000 | 1.58639200  |
| H   | 0.31857500  | -3.27236400 | 1.37736600  |
| H   | -0.30883100 | -4.79043700 | 0.68740100  |
| H   | 0.24567100  | -4.73583600 | 2.36195100  |
| C   | -2.49767700 | -5.05627000 | 2.39773500  |
| H   | -2.02384400 | -5.57395800 | 3.24037100  |
| H   | -2.53379400 | -5.74642400 | 1.54759000  |
| H   | -3.52399900 | -4.81347700 | 2.68749300  |
| C   | -3.14041900 | 0.64277300  | 4.17361100  |
| H   | -3.41014300 | 0.84755600  | 3.13526500  |
| C   | -4.45264900 | 0.54222800  | 4.97591500  |
| H   | -4.98807100 | 1.49766800  | 4.94533400  |
| H   | -4.24453300 | 0.29798400  | 6.02458300  |
| H   | -5.11218800 | -0.22993400 | 4.57129400  |
| N   | -4.06681000 | -0.13456700 | -0.77658800 |
| C   | -5.25114300 | -0.56847800 | -0.29325800 |
| C   | -6.51887400 | -0.28136200 | -1.07908900 |
| H   | -6.36834000 | -0.36530100 | -2.15651300 |

|    |             |             |             |   |             |             |             |
|----|-------------|-------------|-------------|---|-------------|-------------|-------------|
| H  | -7.32365100 | -0.95514600 | -0.78093900 | N | 2.96063600  | 1.63805000  | -1.51230100 |
| H  | -6.84250900 | 0.74490400  | -0.87372200 | C | 4.02685000  | 1.46177600  | -2.31845900 |
| C  | -4.03831700 | 0.44365100  | -2.10349800 | C | 4.16585000  | 2.33254200  | -3.55133800 |
| C  | -3.74476000 | -0.39725100 | -3.20631400 | H | 3.82293800  | 3.35377800  | -3.37404600 |
| C  | -3.70351900 | 0.16025600  | -4.48820200 | H | 5.19529000  | 2.35960500  | -3.91378600 |
| H  | -3.47726500 | -0.46914100 | -5.34008200 | H | 3.53619800  | 1.90860400  | -4.34408800 |
| C  | -3.93436200 | 1.51674600  | -4.69598000 | C | 2.20650800  | 2.85606600  | -1.52421900 |
| H  | -3.89299500 | 1.93045500  | -5.69773400 | C | 2.64929800  | 3.95601200  | -0.74402200 |
| C  | -4.21470400 | 2.33405300  | -3.60976500 | C | 1.81510700  | 5.07588300  | -0.65301900 |
| H  | -4.39235300 | 3.39291800  | -3.76898500 | H | 2.12044300  | 5.92074400  | -0.04685100 |
| C  | -4.27546000 | 1.82049200  | -2.30770700 | C | 0.58361500  | 5.12100500  | -1.30692400 |
| C  | -3.47001100 | -1.88382200 | -3.01050100 | H | -0.05145700 | 5.99471300  | -1.20712800 |
| H  | -2.95480100 | -1.98795900 | -2.05010000 | C | 0.17831600  | 4.04839300  | -2.09304000 |
| C  | -2.57512600 | -2.47991000 | -4.10932800 | H | -0.77208200 | 4.09220400  | -2.61599000 |
| H  | -1.64682900 | -1.91116800 | -4.23716000 | C | 0.98346400  | 2.91036800  | -2.22241600 |
| H  | -2.32098300 | -3.51374400 | -3.85962900 | C | 3.98937900  | 3.91901400  | -0.00758100 |
| H  | -3.09244500 | -2.51035800 | -5.07447600 | H | 4.13884600  | 2.88481800  | 0.32382300  |
| C  | -4.76420300 | -2.71812700 | -2.91152700 | C | 4.03656400  | 4.83791200  | 1.22667900  |
| H  | -5.38814900 | -2.56202200 | -3.79933500 | H | 3.15099800  | 4.73832300  | 1.85488600  |
| H  | -4.51447500 | -3.78260100 | -2.84657700 | H | 4.91596000  | 4.58797000  | 1.83109400  |
| H  | -5.34729600 | -2.46258400 | -2.02453700 | H | 4.13486400  | 5.89042400  | 0.93354300  |
| C  | -4.56451500 | 2.78572200  | -1.16865300 | C | 5.17856600  | 4.28503400  | -0.92308600 |
| H  | -4.59704800 | 2.21350500  | -0.23968500 | H | 4.99999600  | 5.24618100  | -1.41968300 |
| C  | -5.91981600 | 3.49882800  | -1.33868100 | H | 6.09095500  | 4.37675700  | -0.32247700 |
| H  | -6.14063400 | 4.10107800  | -0.45077100 | H | 5.36509300  | 3.52722100  | -1.68460500 |
| H  | -5.90788900 | 4.17116000  | -2.20461900 | C | 0.52907400  | 1.76037700  | -3.11125400 |
| H  | -6.73783300 | 2.78656300  | -1.48400200 | H | 1.31770700  | 0.99962000  | -3.10720600 |
| C  | -3.43612400 | 3.82875100  | -1.04311200 | C | 0.32830600  | 2.21047500  | -4.56986300 |
| H  | -3.40426100 | 4.47620800  | -1.92799600 | H | 0.06735700  | 1.35162000  | -5.19830200 |
| H  | -3.59383200 | 4.46222600  | -0.16451800 | H | -0.48684500 | 2.93895100  | -4.64684100 |
| H  | -2.45864200 | 3.34582000  | -0.94864300 | H | 1.23672000  | 2.67265000  | -4.96956000 |
| Mg | 2.28041500  | -0.02199000 | -0.60825300 | C | -0.75719500 | 1.11696600  | -2.57408600 |
| N  | 4.14036400  | -0.70500200 | -0.17357500 | H | -1.60107500 | 1.80901100  | -2.64988200 |
| C  | 5.12131200  | -0.44002100 | -1.04128300 | H | -1.01111300 | 0.21866600  | -3.14501400 |
| C  | 4.99759500  | 0.47378400  | -2.11393800 | H | -0.64114900 | 0.83802200  | -1.52166000 |
| H  | 5.80649600  | 0.45209400  | -2.83481000 | C | -2.30087000 | 1.82667400  | 4.68828300  |
| C  | 6.45461500  | -1.15298700 | -0.93910700 | H | -2.19022100 | 1.79888700  | 5.77836000  |
| H  | 6.61659800  | -1.57966300 | 0.05203200  | H | -1.29768400 | 1.81992400  | 4.24952500  |
| H  | 7.27389500  | -0.46831800 | -1.17049500 | H | -2.78908100 | 2.77282100  | 4.43072900  |
| H  | 6.48443700  | -1.96871200 | -1.67081400 | C | 5.29875200  | -4.57454200 | -0.70286800 |
| C  | 4.35001100  | -1.51835500 | 0.99325000  | H | 5.38116700  | -5.38904600 | 0.02633300  |
| C  | 4.54652000  | -0.85893800 | 2.23130600  | H | 5.18854700  | -5.02271900 | -1.69653400 |
| C  | 4.67800100  | -1.63306100 | 3.38729700  | H | 6.23585900  | -4.01136300 | -0.67872700 |
| H  | 4.82835100  | -1.14704400 | 4.34400500  | C | 1.05149400  | -1.54256700 | -1.54994800 |
| C  | 4.61011000  | -3.02374100 | 3.33393400  | C | 1.69284000  | -2.21248300 | -2.58205700 |
| H  | 4.71111000  | -3.60728500 | 4.24265800  | C | -0.13661300 | -2.12376900 | -1.17912900 |
| C  | 4.41119900  | -3.65777900 | 2.11424300  | C | 1.24151500  | -3.39259300 | -3.15579300 |
| H  | 4.36038200  | -4.74162700 | 2.07721000  | C | -0.64384400 | -3.31421800 | -1.67400600 |
| C  | 4.27886300  | -2.92568400 | 0.92708300  | C | 0.06590800  | -3.95535700 | -2.67769800 |
| C  | 4.63358300  | 0.66297000  | 2.28891500  | F | 2.89577900  | -1.70182600 | -3.06142000 |
| H  | 3.93452100  | 1.05712700  | 1.54331000  | F | 1.94230800  | -4.02826800 | -4.14646100 |
| C  | 4.23231000  | 1.24891500  | 3.65062700  | F | -0.41523800 | -5.12100800 | -3.21247400 |
| H  | 3.26306700  | 0.86365100  | 3.98309300  | F | -1.81828200 | -3.86408800 | -1.21938200 |
| H  | 4.15692100  | 2.33743400  | 3.57252000  | F | -0.94848700 | -1.49267600 | -0.17821800 |
| H  | 4.97789400  | 1.02301700  | 4.42205800  | C | -1.93051400 | 2.57173700  | 1.56112200  |
| C  | 6.03778500  | 1.16463800  | 1.89415400  | C | -1.25372600 | 1.44804600  | 1.10888600  |
| H  | 6.79665700  | 0.74698400  | 2.56615700  | C | -1.32493800 | 3.72533100  | 2.03659500  |
| H  | 6.07964200  | 2.25807700  | 1.96488900  | C | 0.10635400  | 1.56460200  | 1.23980300  |
| H  | 6.29180400  | 0.88770900  | 0.86768000  | C | 0.05912000  | 3.76134900  | 2.13994300  |
| C  | 4.08625400  | -3.67644800 | -0.38523200 | C | 0.79039100  | 2.64783700  | 1.75924500  |
| H  | 3.99093900  | -2.93955500 | -1.18890700 | F | -3.32224100 | 2.55659000  | 1.59373800  |
| C  | 2.80166500  | -4.52561900 | -0.36675000 | F | -2.06854000 | 4.80227300  | 2.44295300  |
| H  | 2.83876900  | -5.28222900 | 0.42492100  | F | 0.69406000  | 4.86912700  | 2.63433200  |
| H  | 2.67846100  | -5.04755100 | -1.32244600 | F | 2.14972400  | 2.61534300  | 1.91655500  |
| H  | 1.92049200  | -3.90285200 | -0.19006600 | F | 0.95988000  | 0.47717100  | 0.83202500  |



## 7. Multinuclear NMR Data

**Figure S20:**  $^1\text{H}$  NMR spectrum of compound **2a**; solvent peak marked with asterisk.

$^1\text{H}$  NMR, 400 MHz,  $\text{C}_6\text{D}_6$ , 298 K

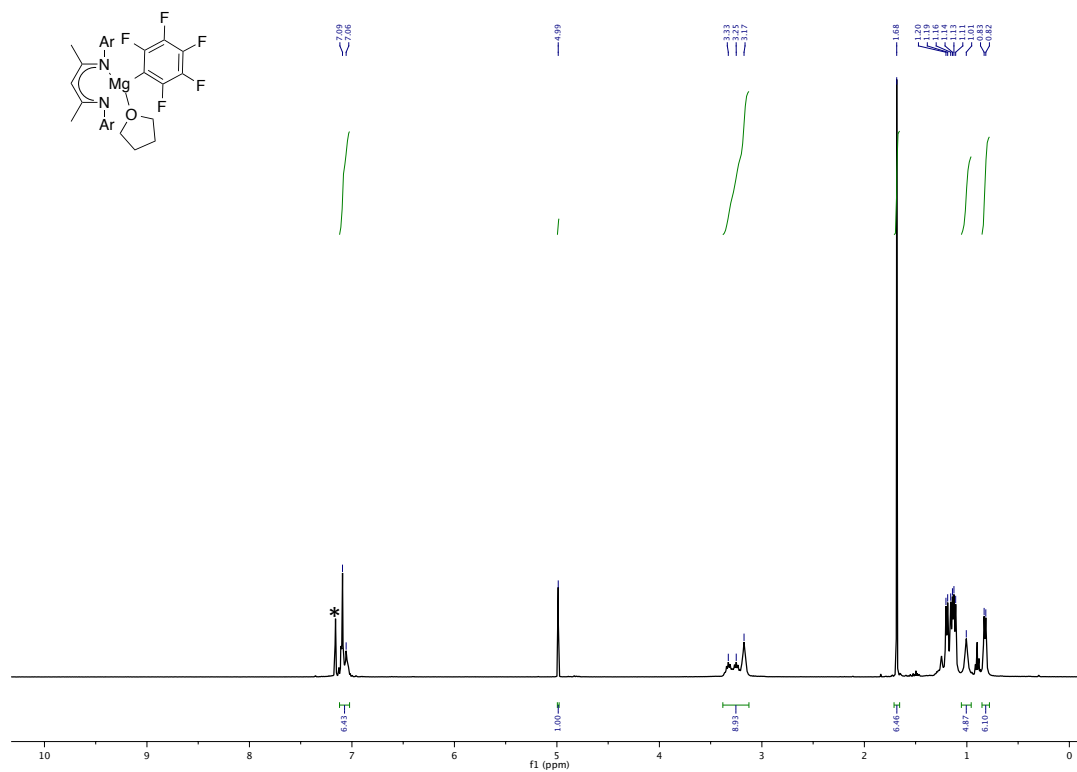

**Figure S21:**  $^{19}\text{F}$  NMR spectrum of compound **2a**.

$^{19}\text{F}$  NMR, 376.5 MHz,  $\text{C}_6\text{D}_6$ , 298 K

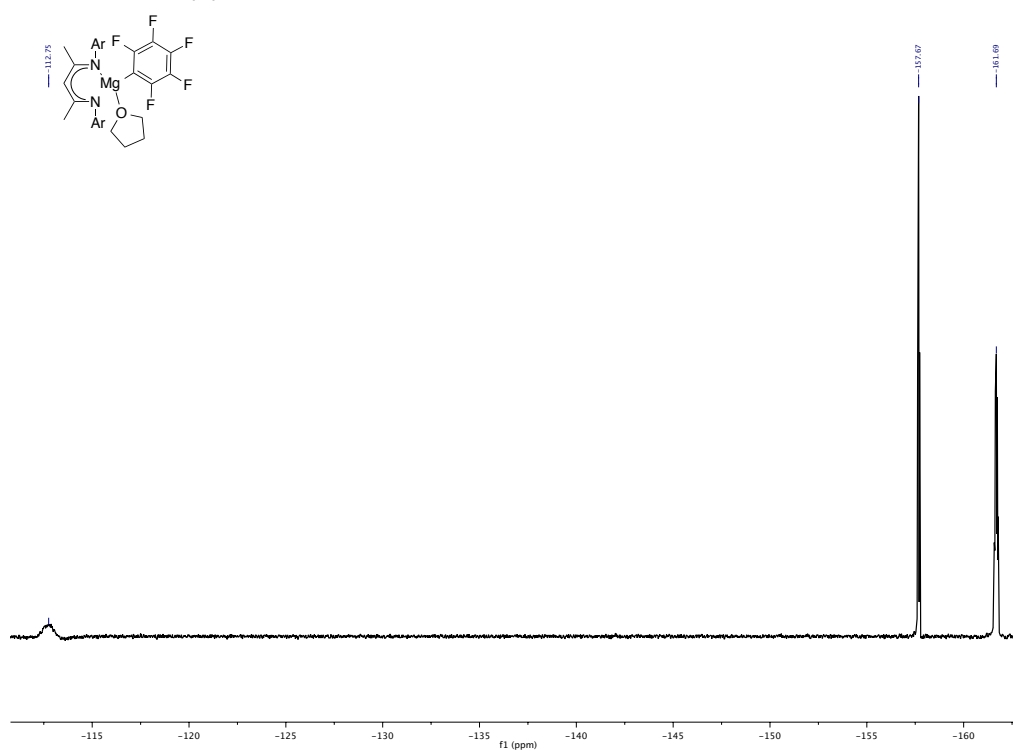

**Figure S22:**  $^{13}\text{C}\{^1\text{H}\}$  NMR spectrum of compound **2a**.

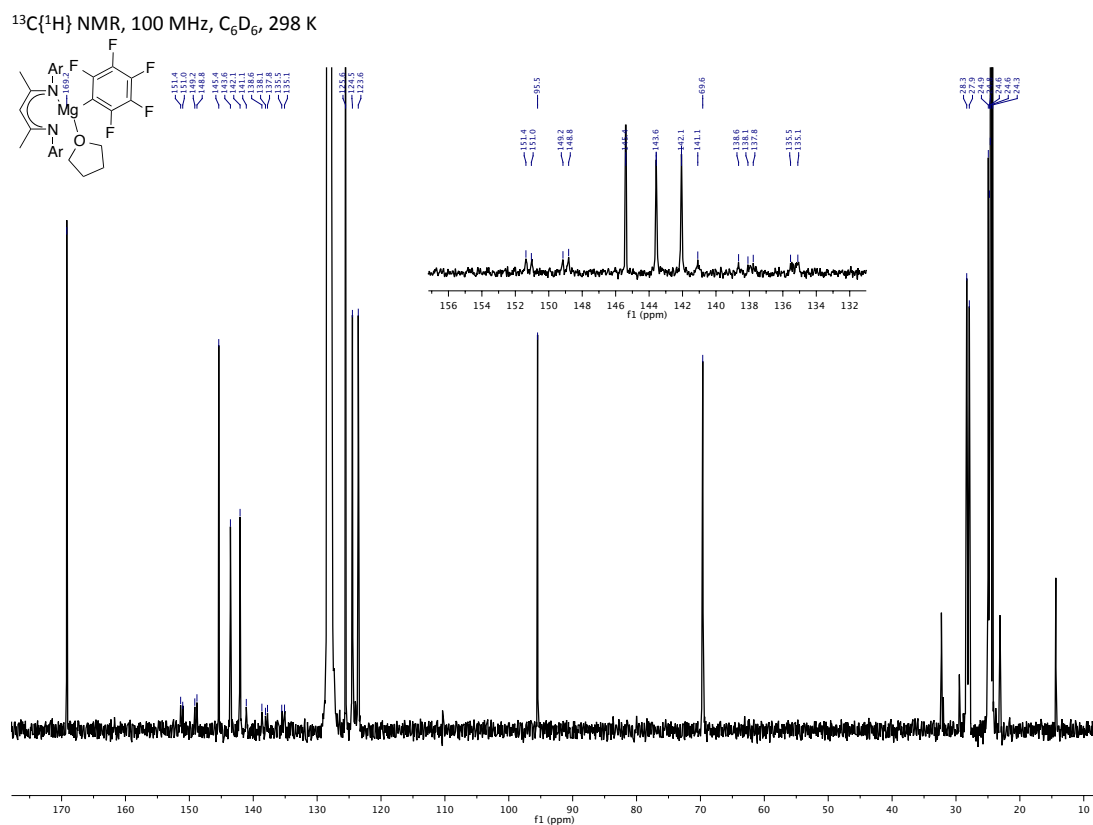

**Figure S23:**  $^1\text{H}$  NMR spectrum of compound **2b**; solvent peak marked with asterisk.

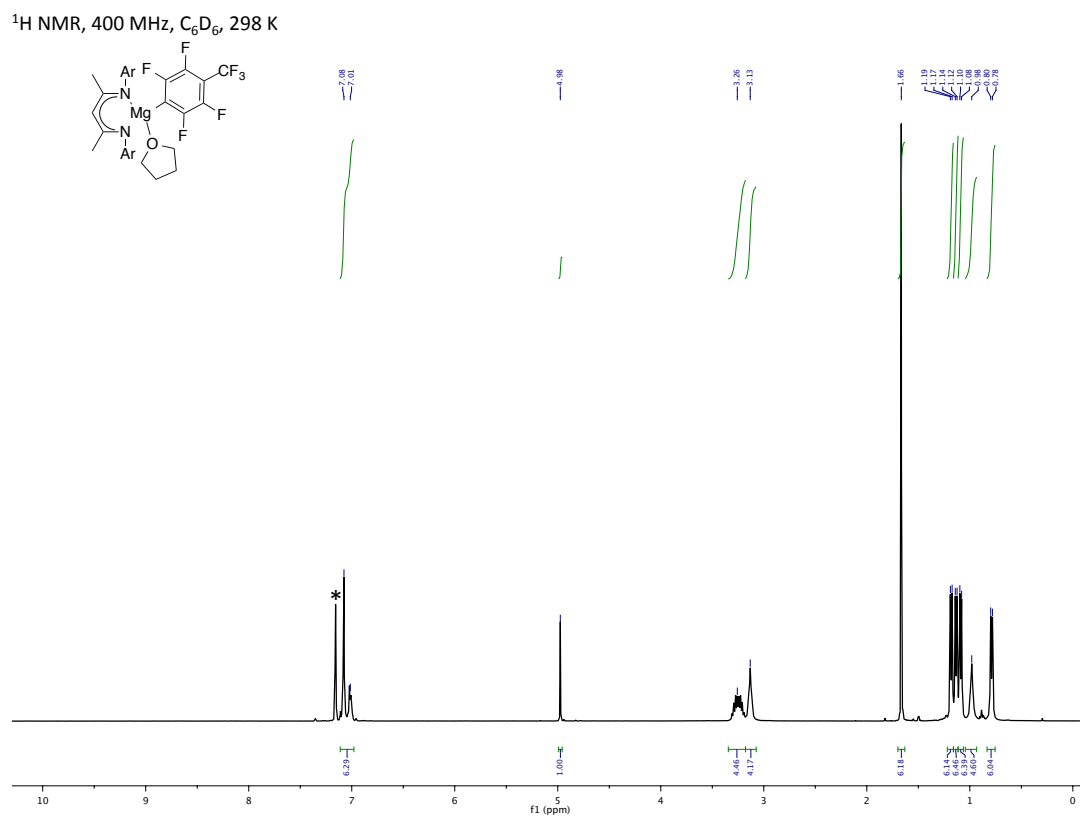

**Figure S24:**  $^{19}\text{F}$  NMR spectrum of compound **2b**.

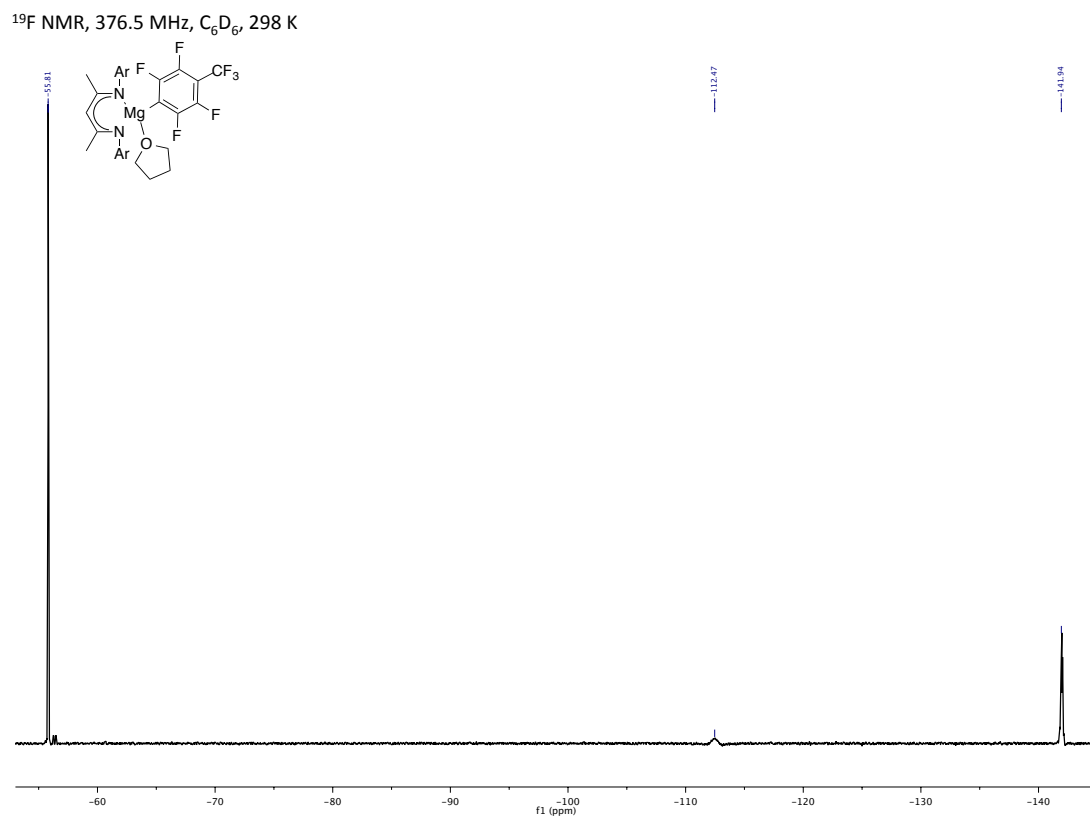

**Figure S25:**  $^{13}\text{C}\{^1\text{H}\}$  NMR spectrum of compound **2b**.

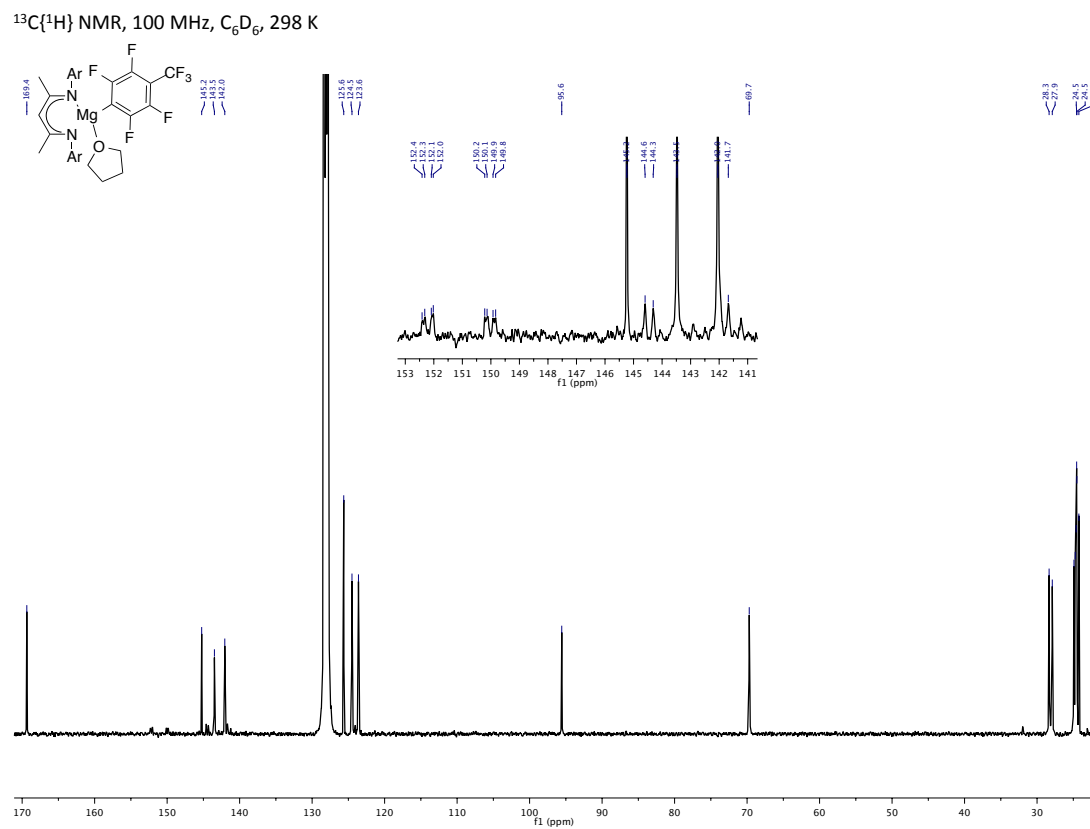

**Figure S26:**  $^1\text{H}$  NMR spectrum of compound **2c**; solvent peak marked with asterisk.

$^1\text{H}$  NMR, 400 MHz,  $\text{C}_6\text{D}_6$ , 298 K

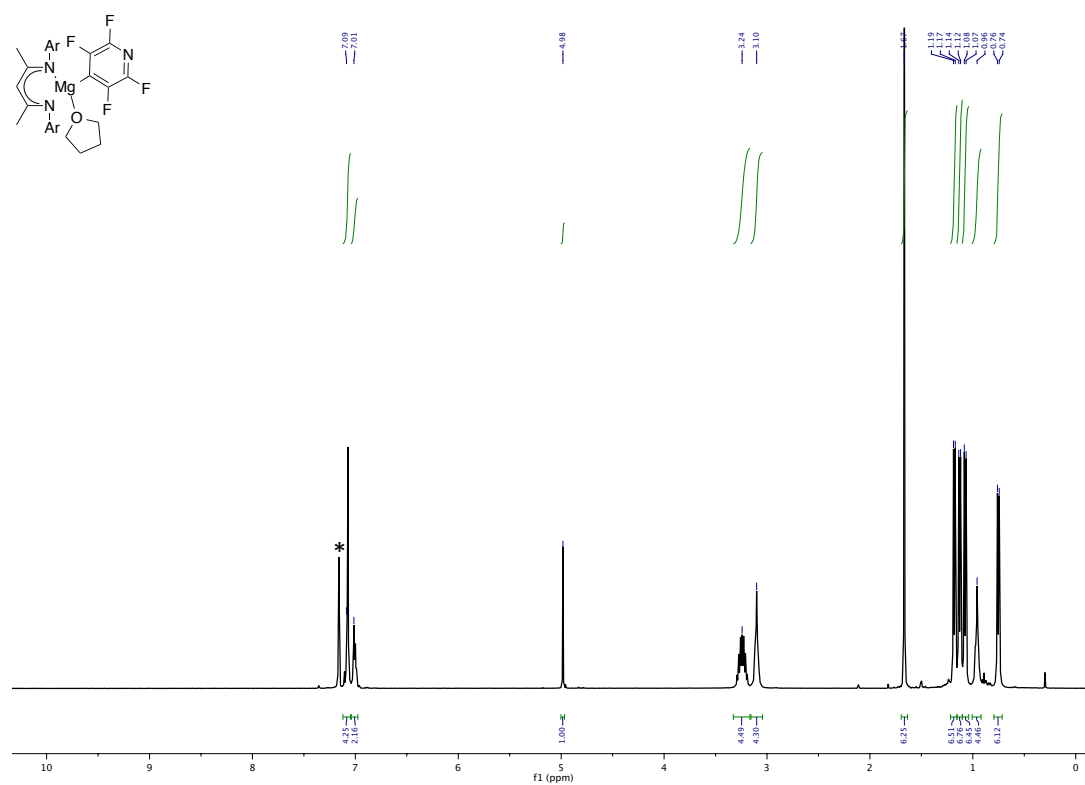

**Figure S27:**  $^{19}\text{F}$  NMR spectrum of compound **2c**.

$^{19}\text{F}$  NMR, 376.5 MHz,  $\text{C}_6\text{D}_6$ , 298 K

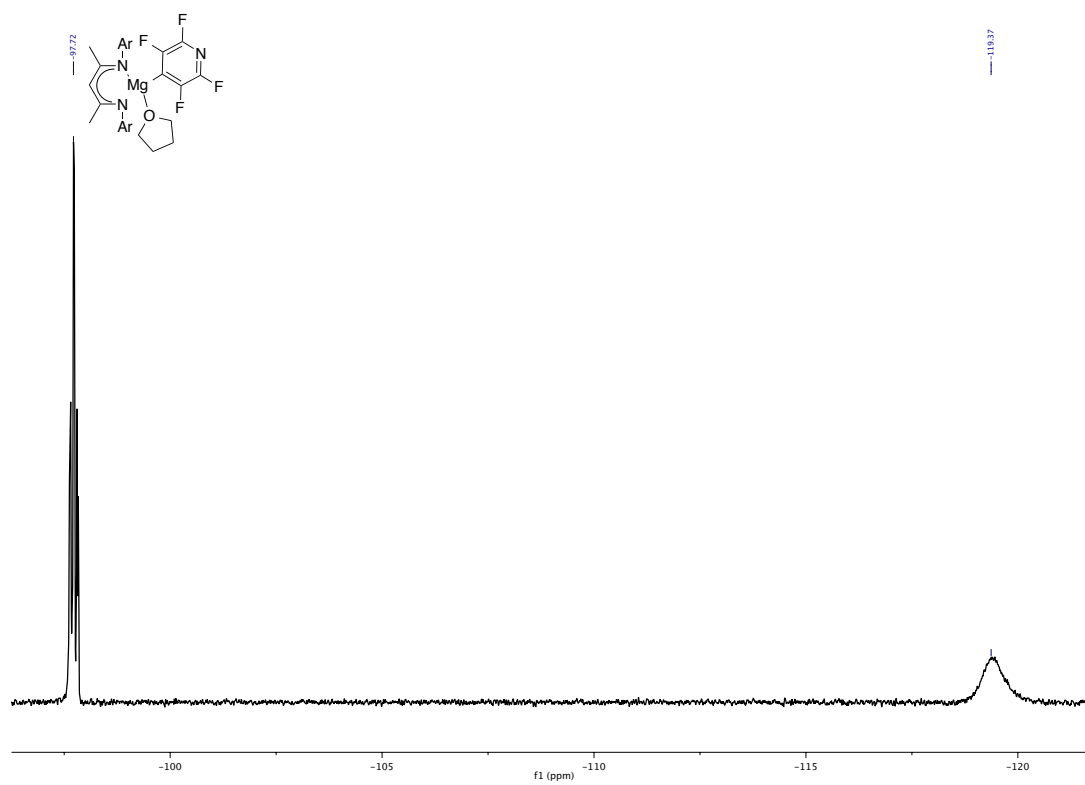

**Figure S28:**  $^{13}\text{C}\{^1\text{H}\}$  NMR spectrum of compound **2c**.

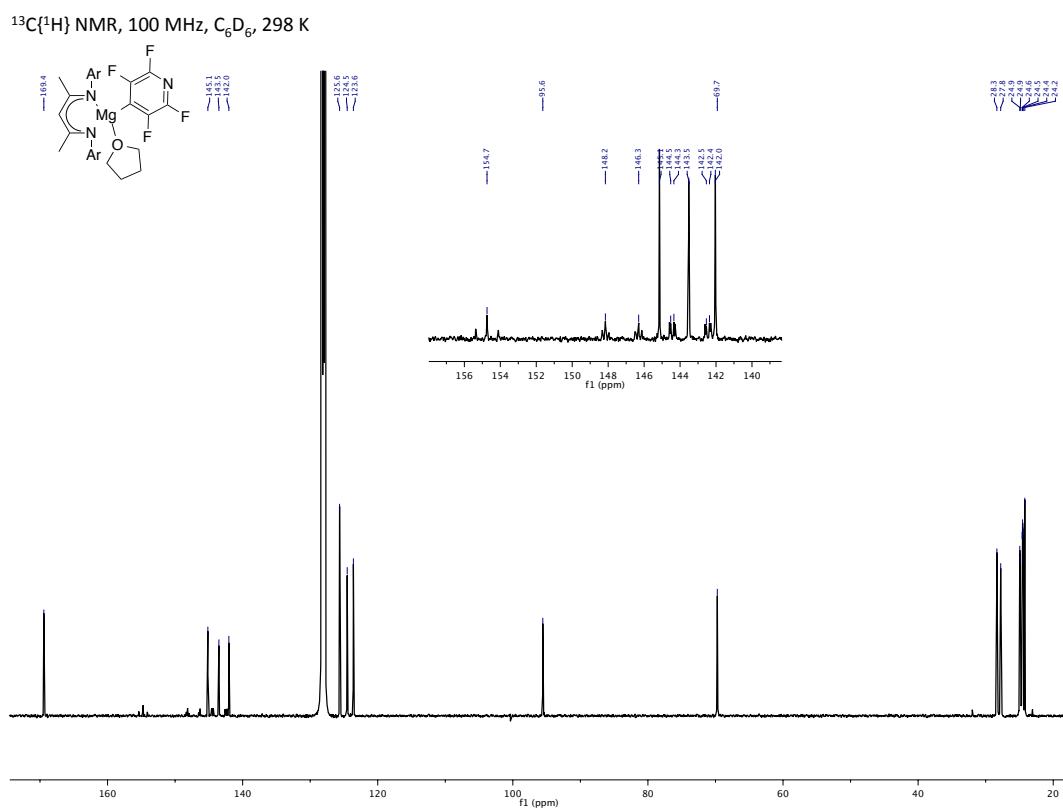

**Figure S29:**  $^1\text{H}$  NMR spectrum of compound **2d**; solvent peak marked with asterisk.

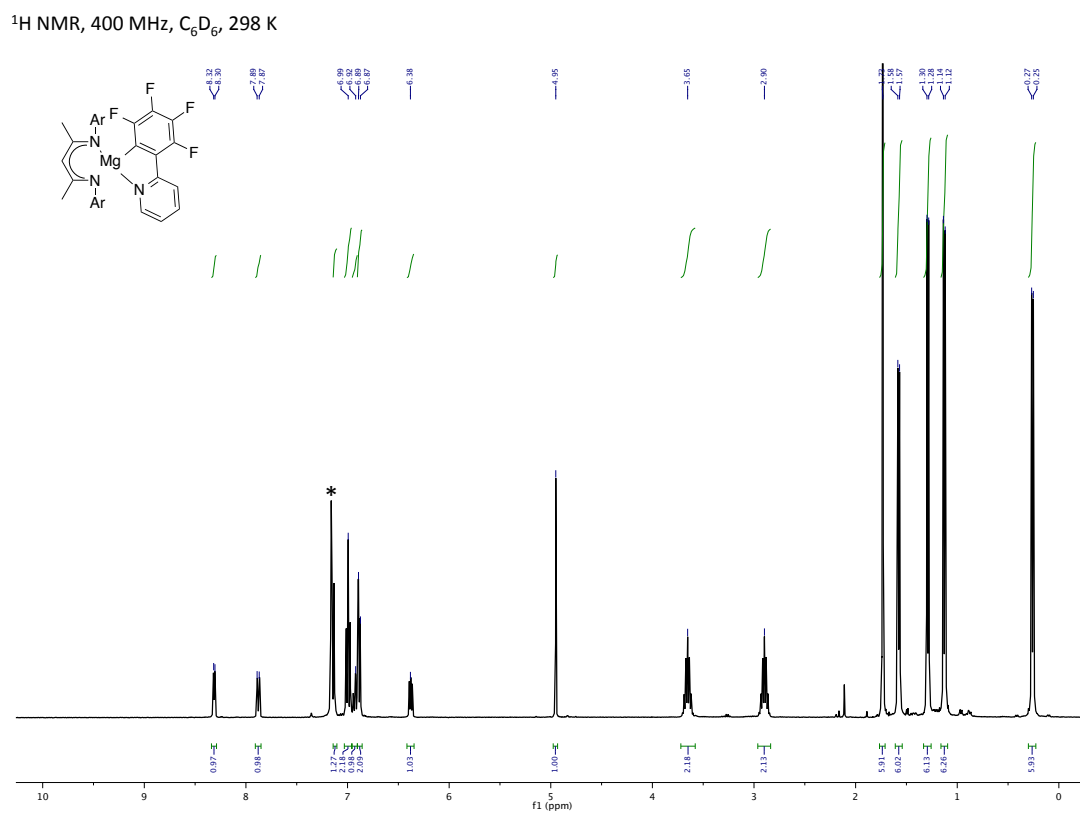



**Figure S32:**  $^1\text{H}$  NMR spectrum of compound **2e**; solvent peak marked with asterisk.

$^1\text{H}$  NMR, 400 MHz,  $\text{C}_6\text{D}_6$ , 298 K

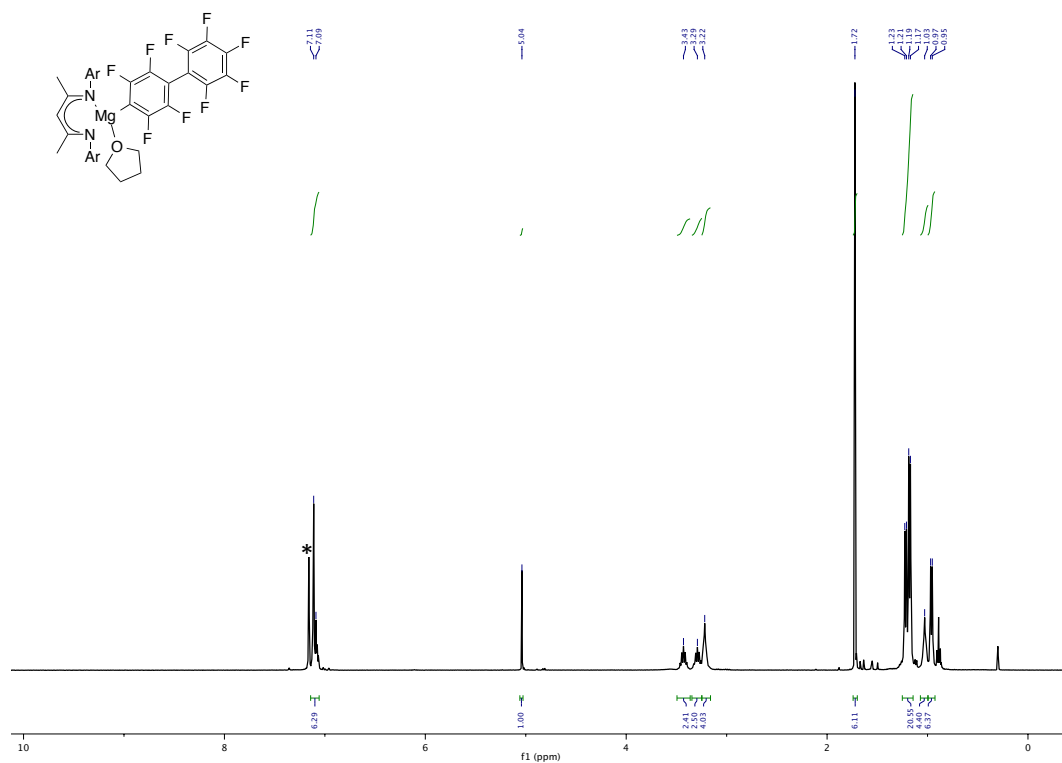

**Figure S33:**  $^{19}\text{F}$  NMR spectrum of compound **2e**.

$^{19}\text{F}$  NMR, 376.5 MHz,  $\text{C}_6\text{D}_6$ , 298 K.

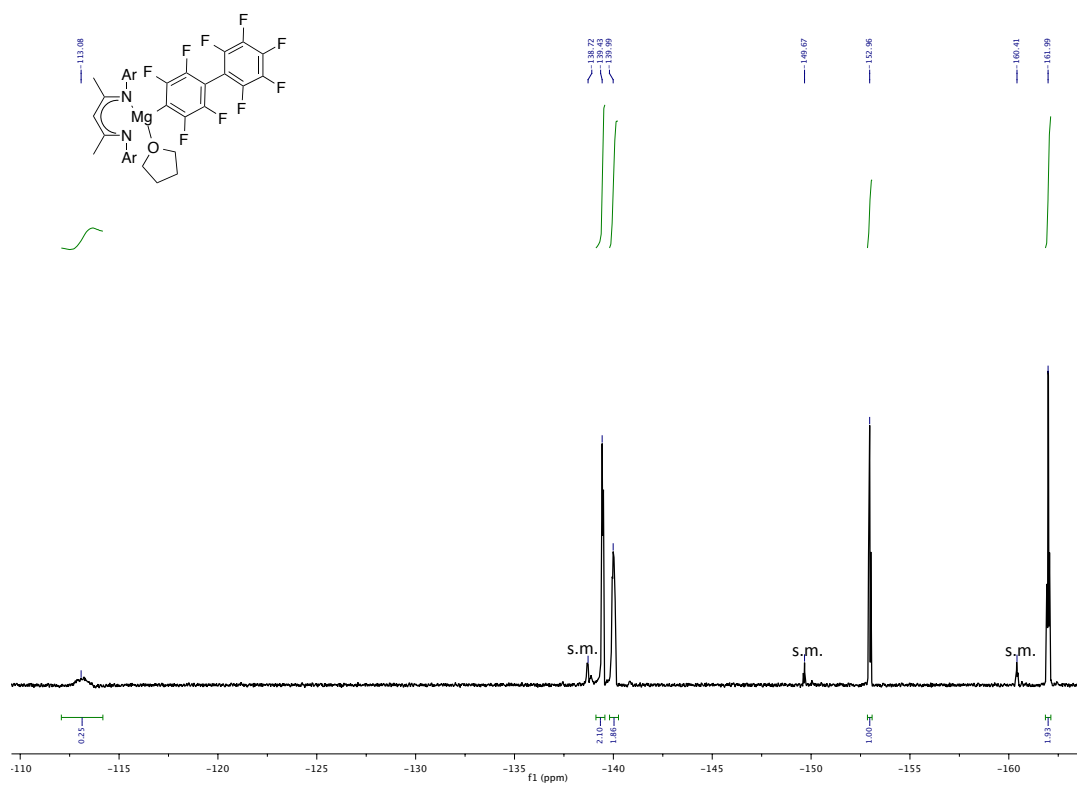





Figure S36:  $^{19}\text{F}$  NMR spectrum of compound 2f.

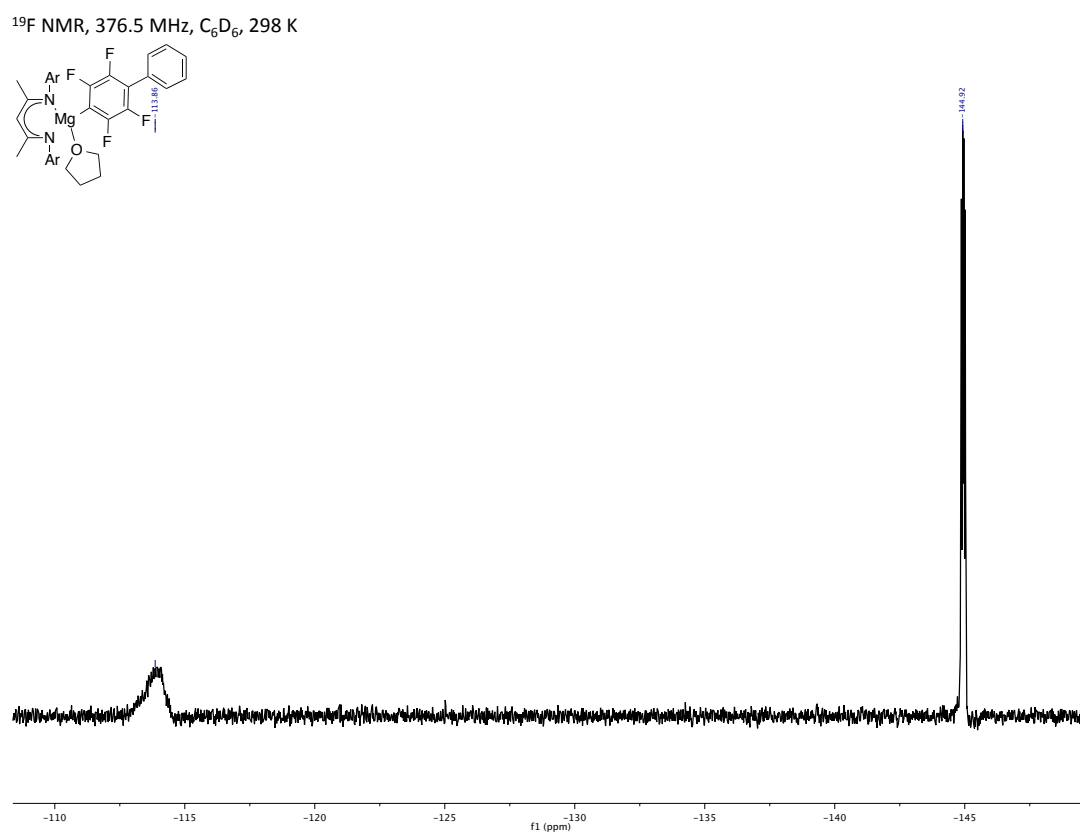

Figure S37:  $^{13}\text{C}\{^1\text{H}\}$  NMR spectrum of compound 2f.

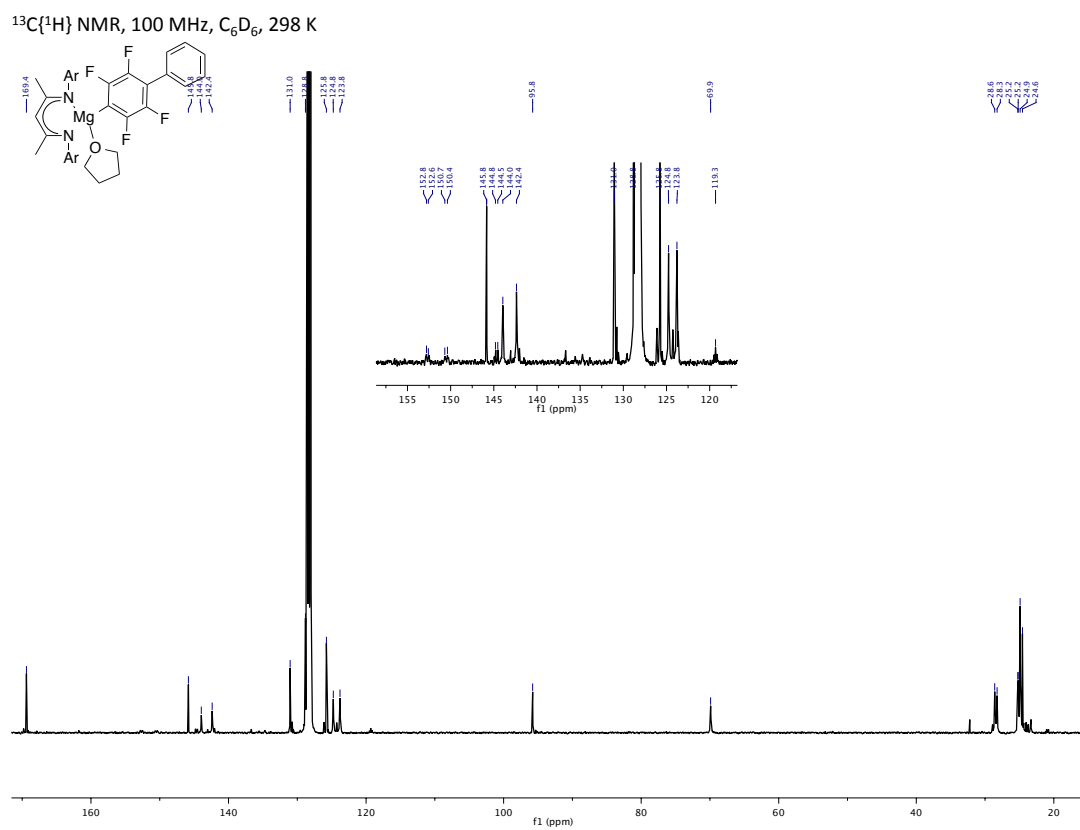

**Figure S38:**  $^1\text{H}$  NMR spectrum of compound **2g**; solvent peak marked with asterisk.

$^1\text{H}$  NMR, 400 MHz,  $\text{C}_6\text{D}_6$ , 298 K

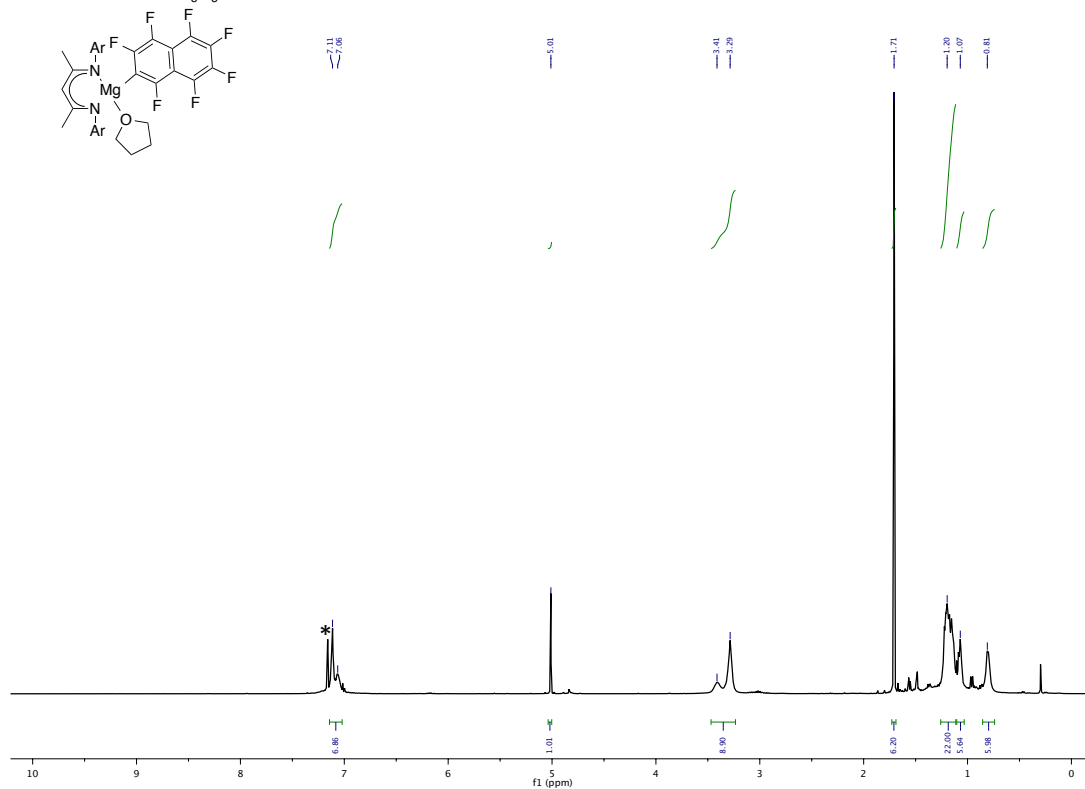

**Figure S39:**  $^{19}\text{F}$  NMR spectrum of compound **2g**.

$^{19}\text{F}$  NMR, 376.5 MHz,  $\text{C}_6\text{D}_6$ , 298 K

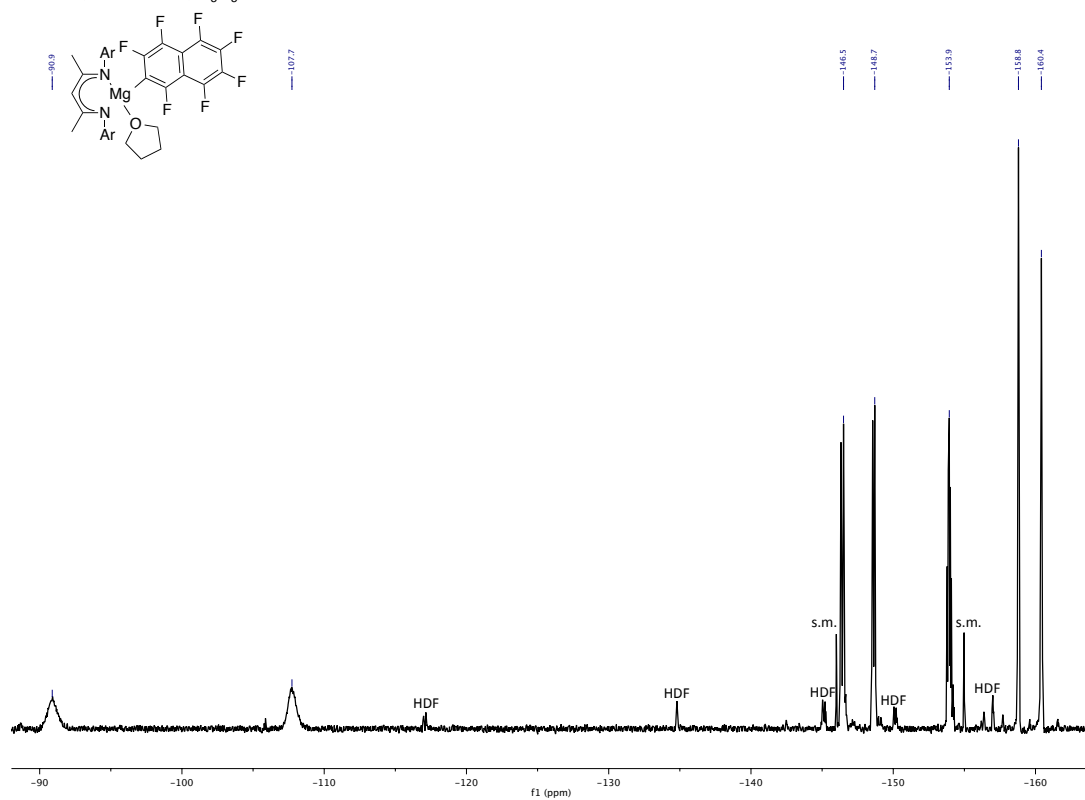



**Figure S42:**  $^{19}\text{F}$  NMR spectrum of compounds **2h** and **2h'**.

$^{19}\text{F}$  NMR, 376.5 MHz,  $\text{C}_6\text{D}_6$ , 298 K

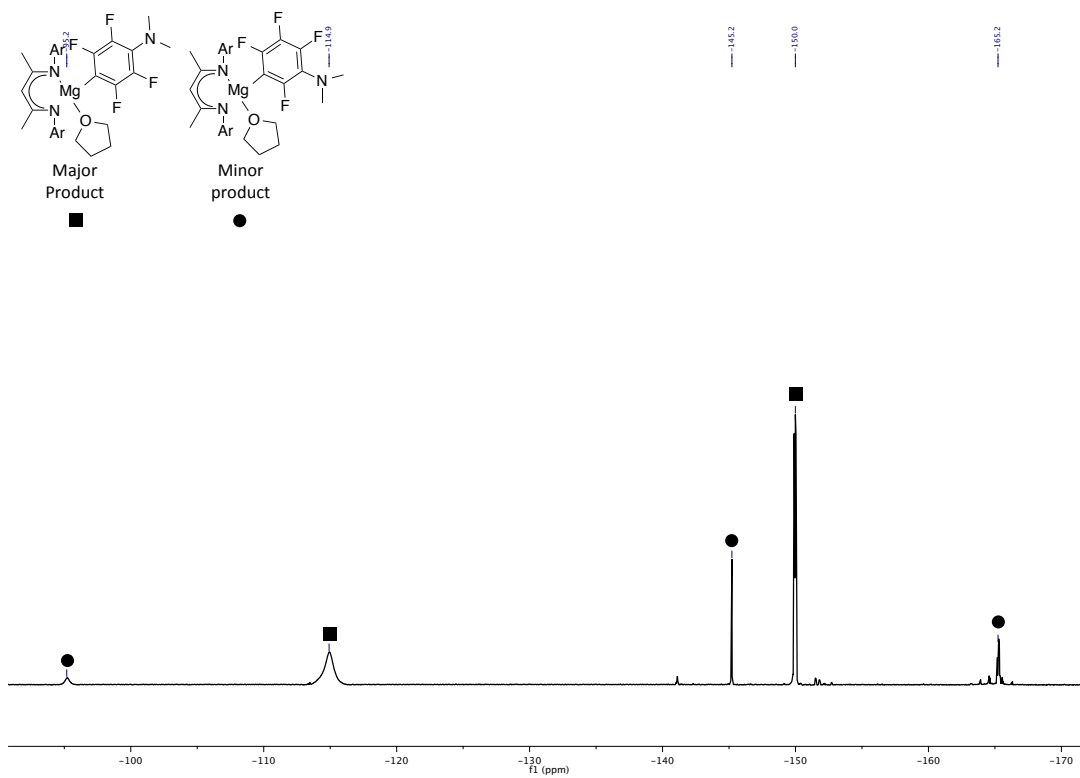

**Figure S43:**  $^{19}\text{F}$  NMR spectrum of protonated **2h** and **2h'**.

$^{19}\text{F}$  NMR, 376.5 MHz,  $\text{C}_6\text{D}_6$ , 298 K + MeOH

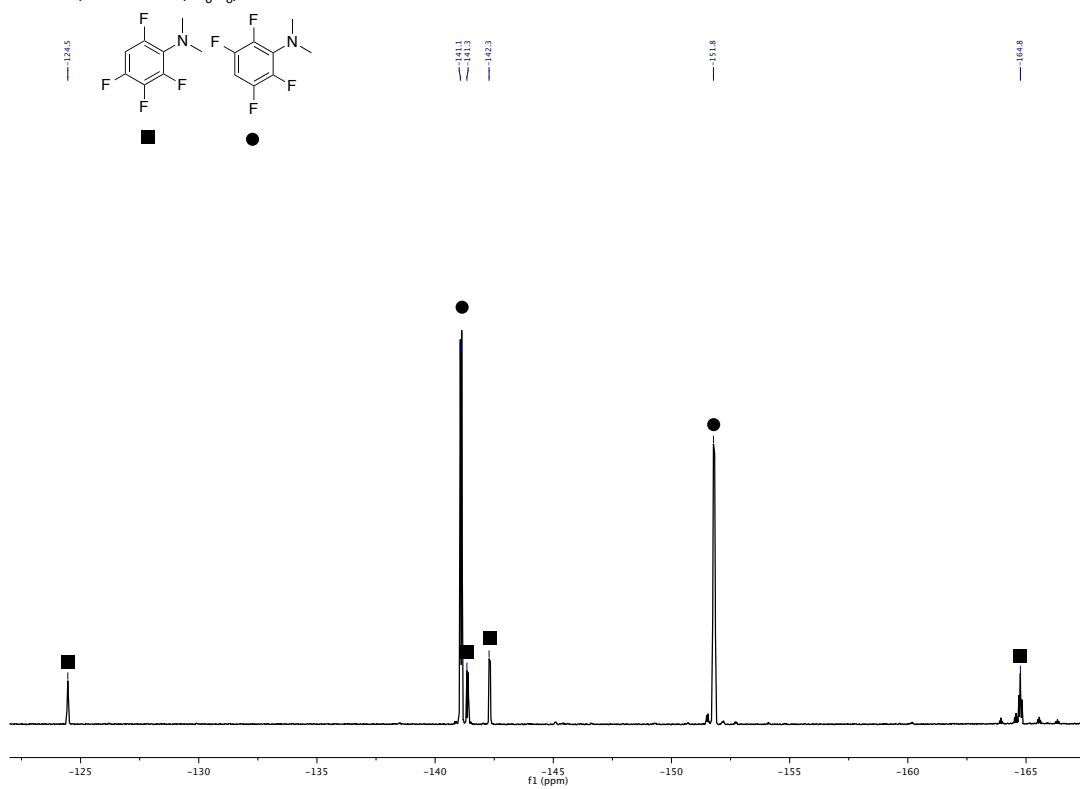

**Figure S44:**  $^1\text{H}$  NMR spectrum of compound **2i**; solvent peak marked with asterisk.

$^1\text{H}$  NMR, 400 MHz,  $\text{C}_6\text{D}_6$ , 298 K

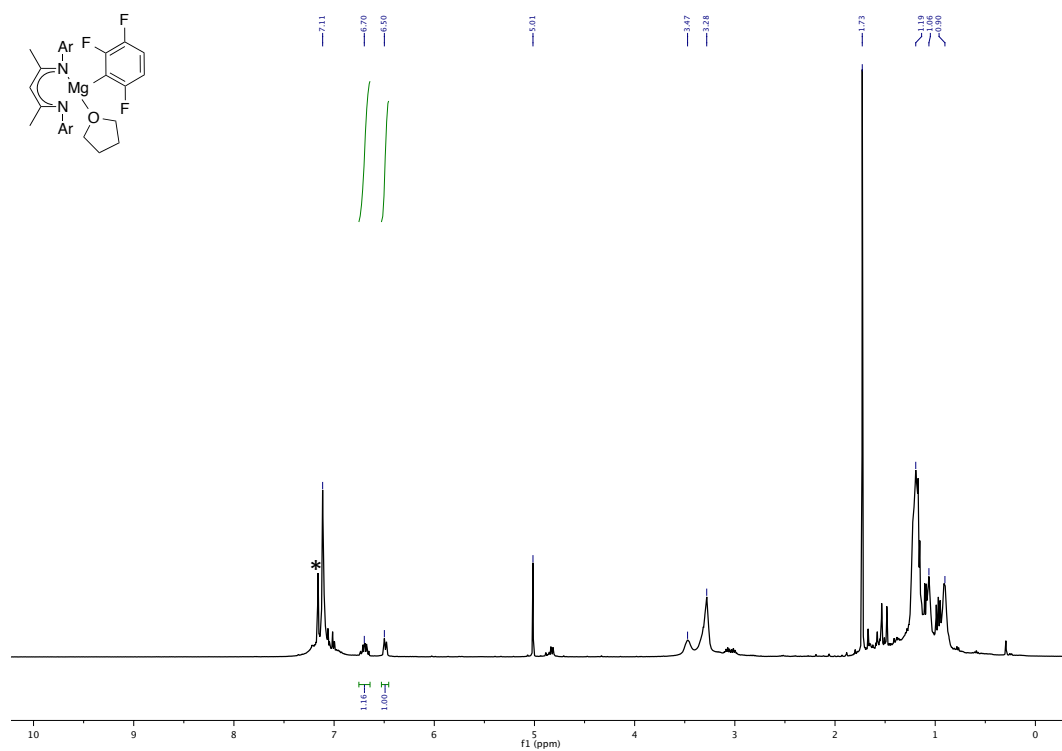

**Figure S45:**  $^{19}\text{F}$  NMR spectrum of compound **2i**.

$^{19}\text{F}$  NMR, 376.5 MHz,  $\text{C}_6\text{D}_6$ , 298 K

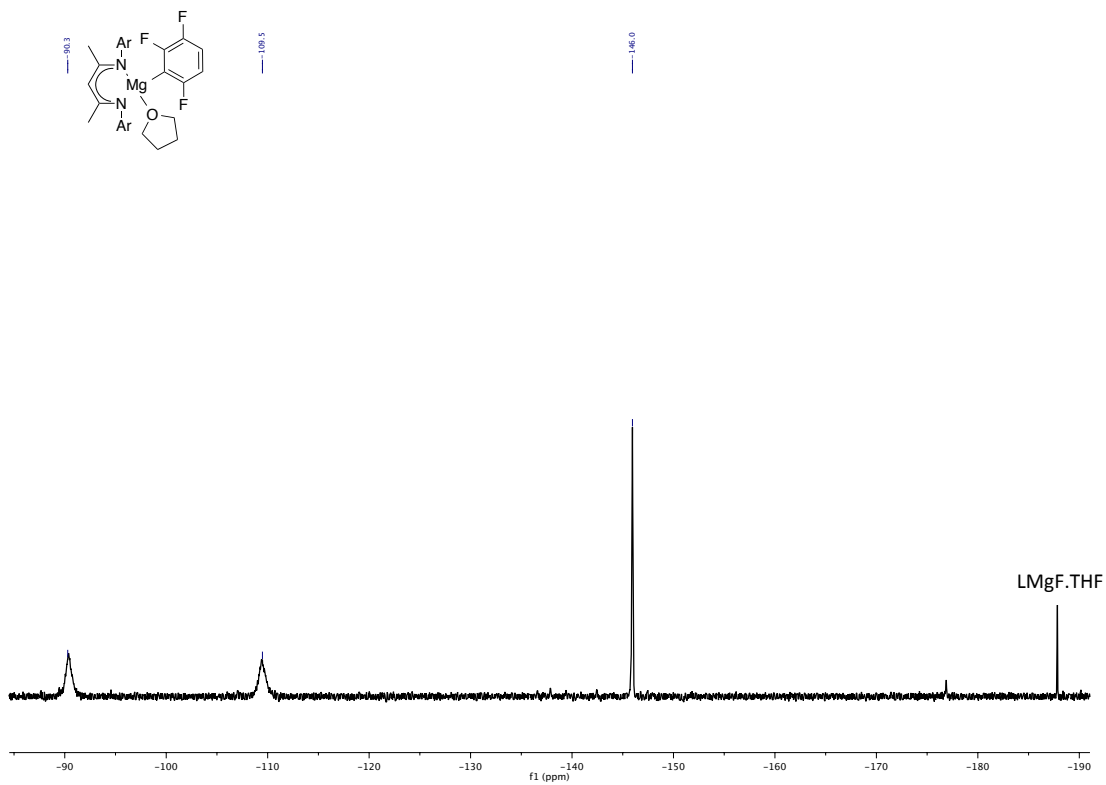

**Figure S46:**  $^{13}\text{C}\{^1\text{H}\}$  NMR spectrum of compound **2i**.

$^{13}\text{C}\{^1\text{H}\}$  NMR, 125 MHz,  $\text{C}_6\text{D}_6$ , 298 K

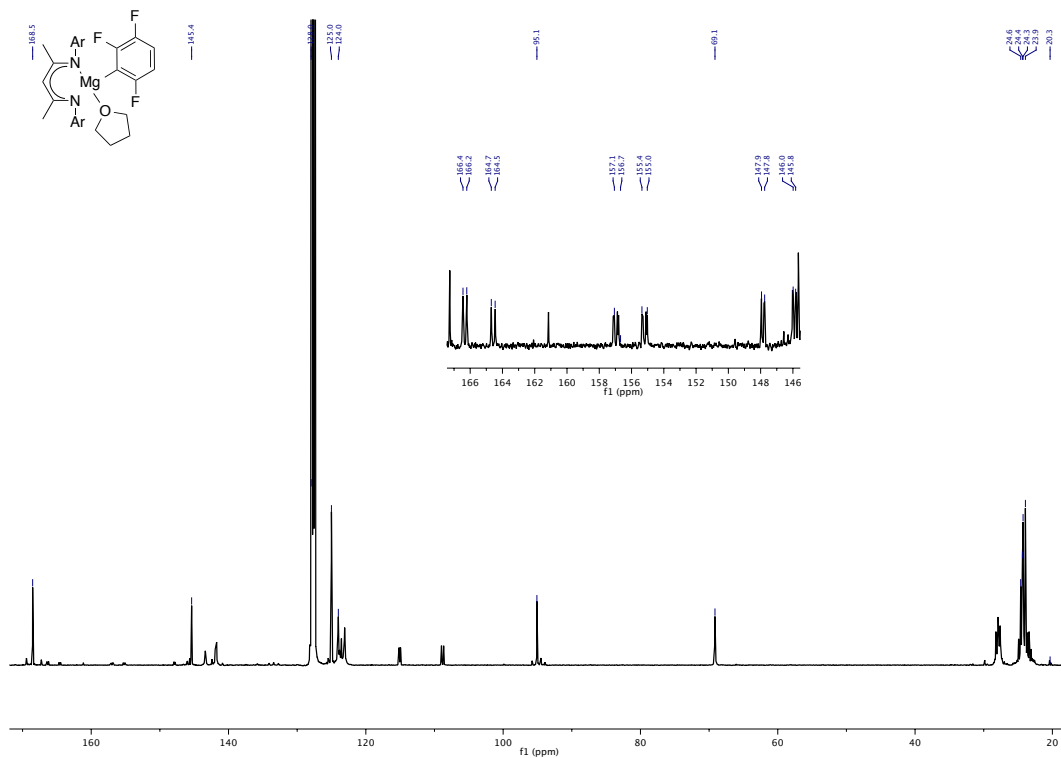

**Figure S47:**  $^1\text{H}$  NMR spectrum of the NMR scale formation of compounds **2j**, **2j'** and **2a**; solvent peak marked with asterisk.

$^1\text{H}$  NMR, 400 MHz,  $\text{C}_6\text{D}_6$ , 298 K – NMR scale reaction.

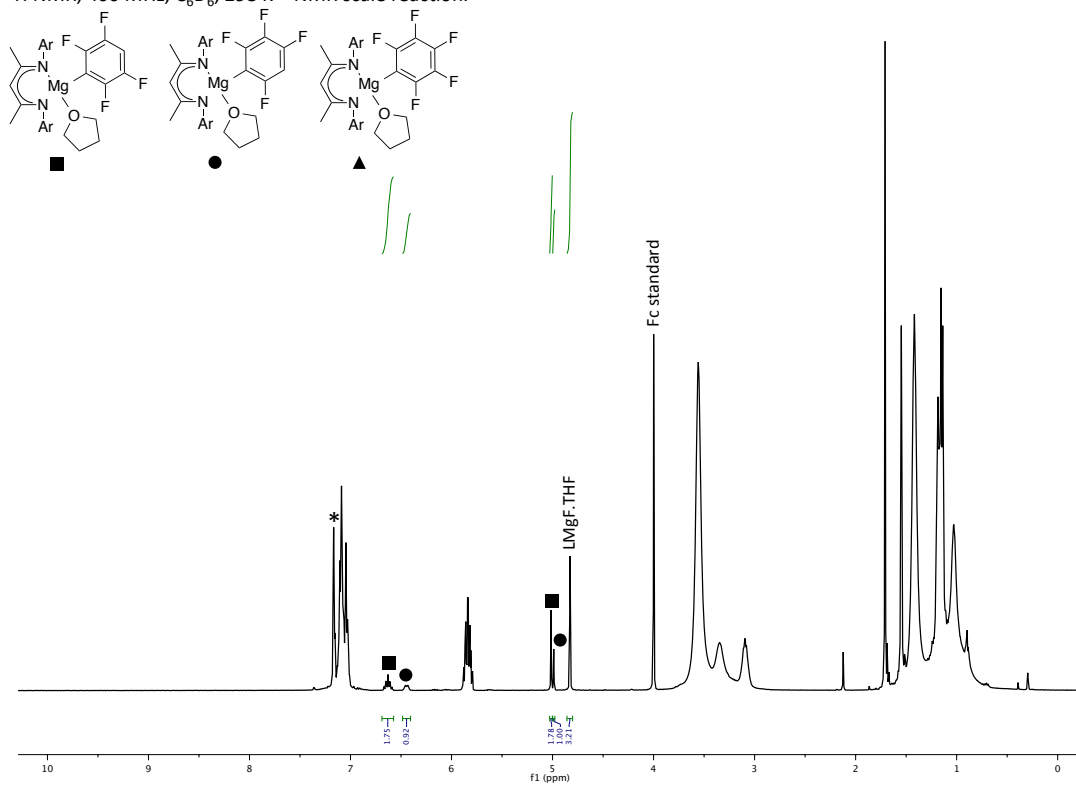

**Figure S48:**  $^{19}\text{F}$  NMR spectrum of the NMR scale formation of compounds **2j**, **2j'** and **2a**.

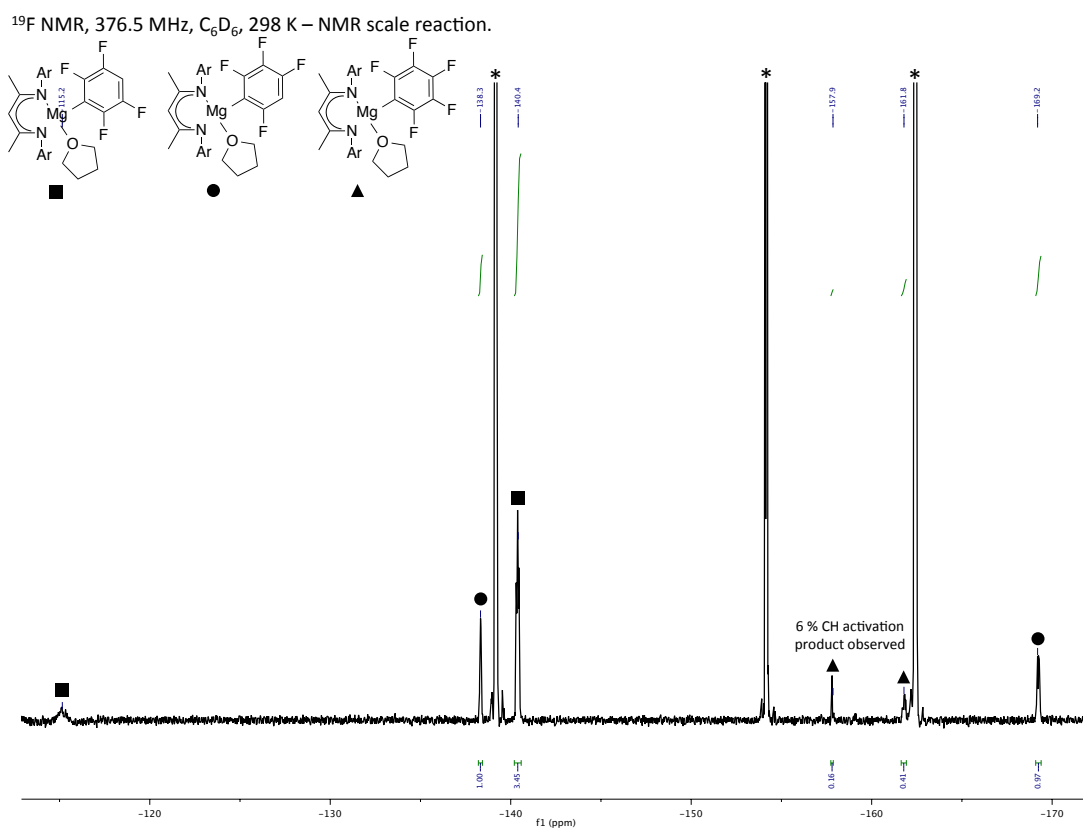

**Figure S49:**  $^{19}\text{F}$  NMR spectrum of the NMR scale formation of compounds **2j**, **2j'** and **2a** protonated with MeOH.

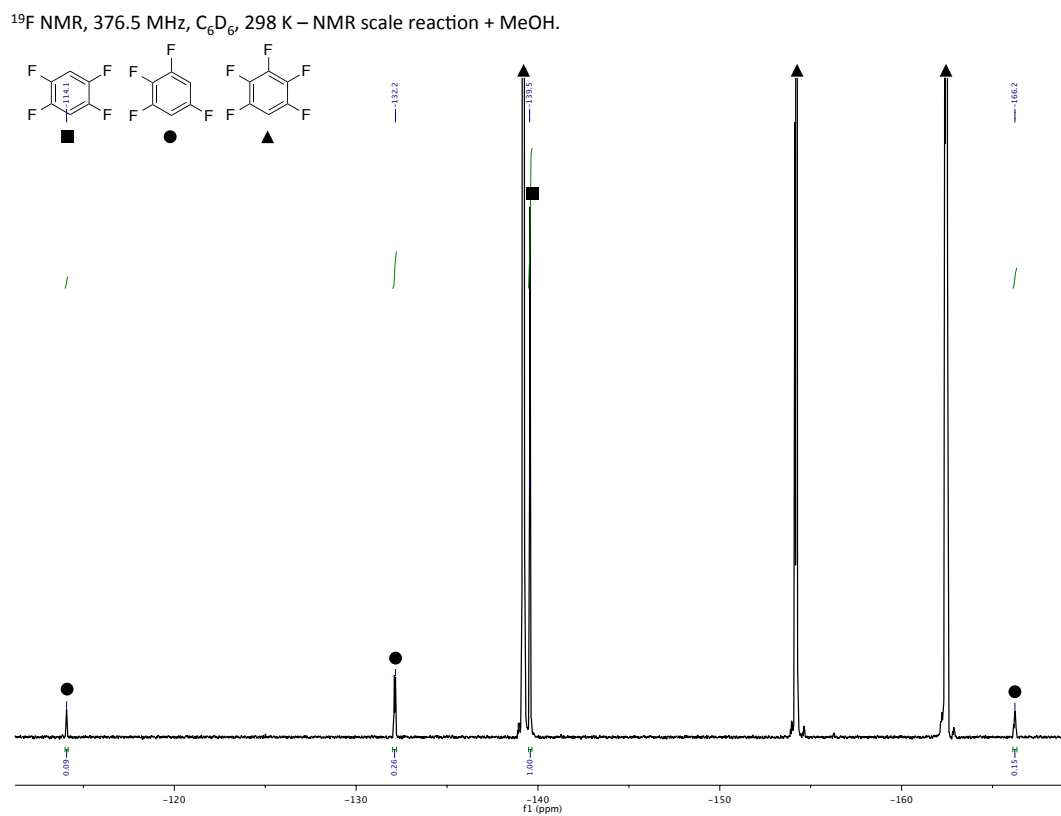

**Figure S50:**  $^1\text{H}$  NMR spectrum of isolated compounds **2j**, **2j'** and **2a**; solvent peak marked with asterisk.

$^1\text{H}$  NMR, 400 MHz,  $\text{C}_6\text{D}_6$ , 298 K – Preparative scale reaction.

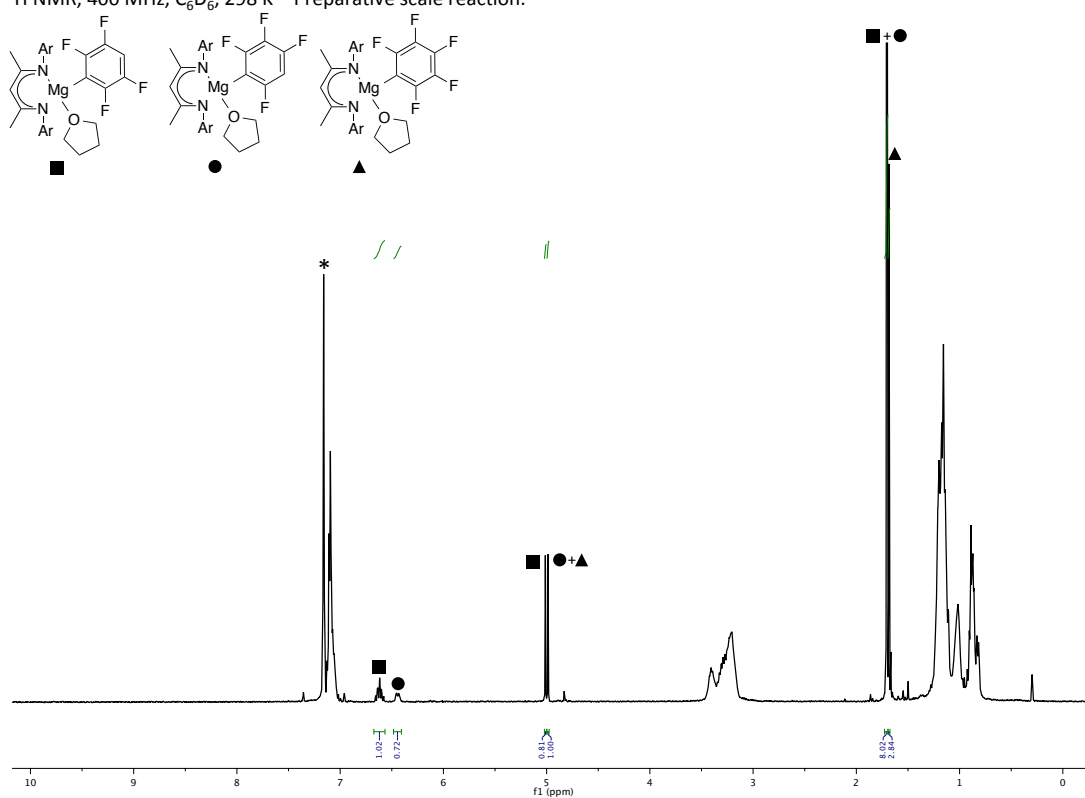

**Figure S51:**  $^{19}\text{F}$  NMR spectrum of isolated compounds **2j**, **2j'** and **2a**.

$^{19}\text{F}$  NMR, 376.5 MHz,  $\text{C}_6\text{D}_6$ , 298 K - Preparative scale reaction.

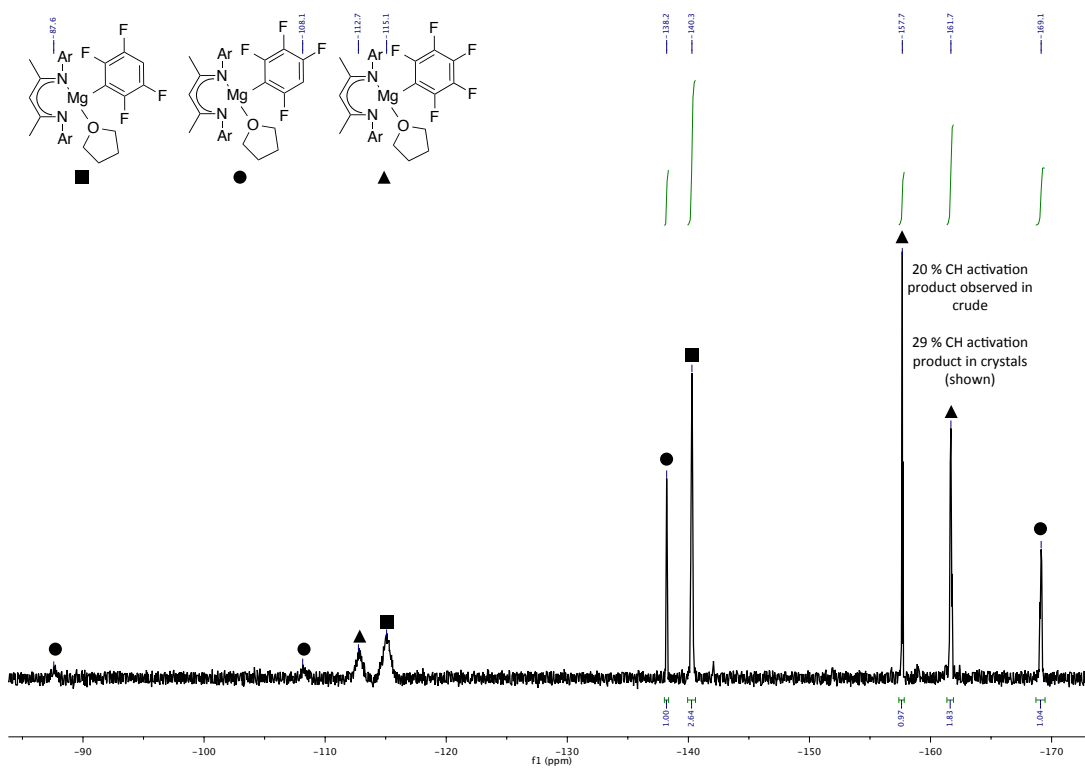



**Figure S52:**  $^{19}\text{F}$  NMR spectrum protonated **2j**, **2j'** and **2a**.

$^{19}\text{F}$  NMR, 376.5 MHz,  $\text{C}_6\text{D}_6$ , 298 K – Preparative scale reaction + MeOH.

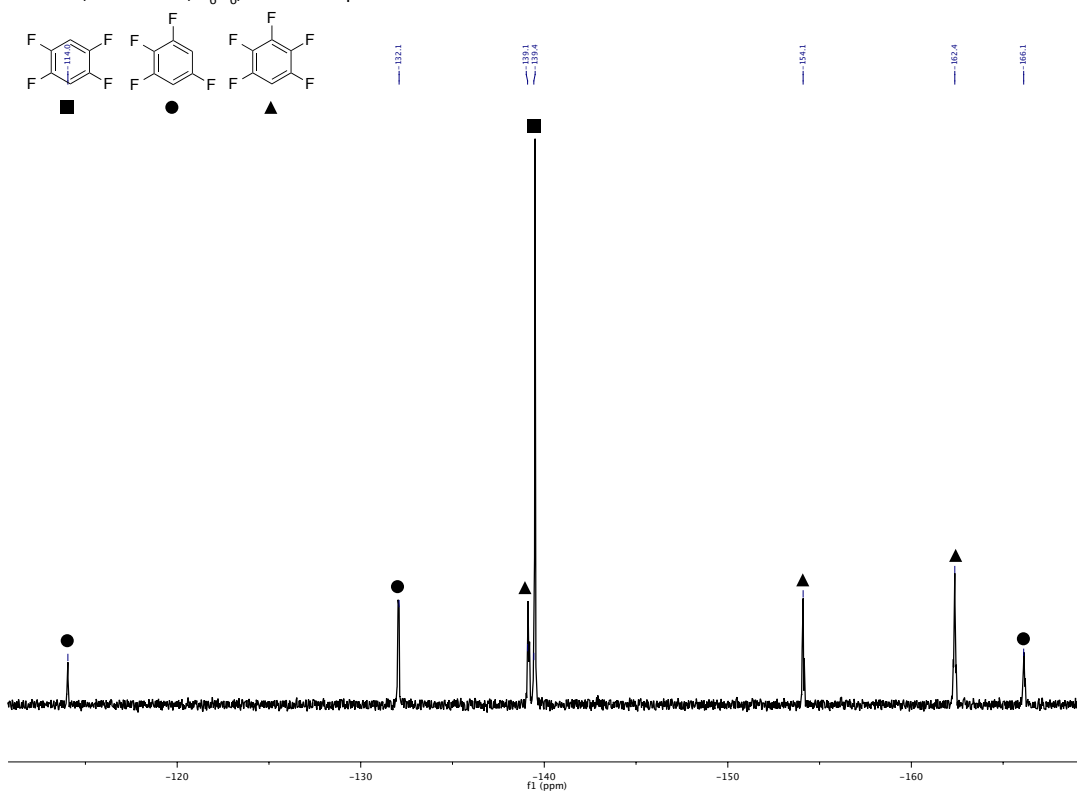

**Figure S53:**  $^1\text{H}$  NMR spectrum of the NMR scale formation of compounds **2k**, **2k'** and **2j'**; solvent peak marked with asterisk.

$^1\text{H}$  NMR, 400 MHz,  $\text{C}_6\text{D}_6$ , 298 K – NMR scale reaction.

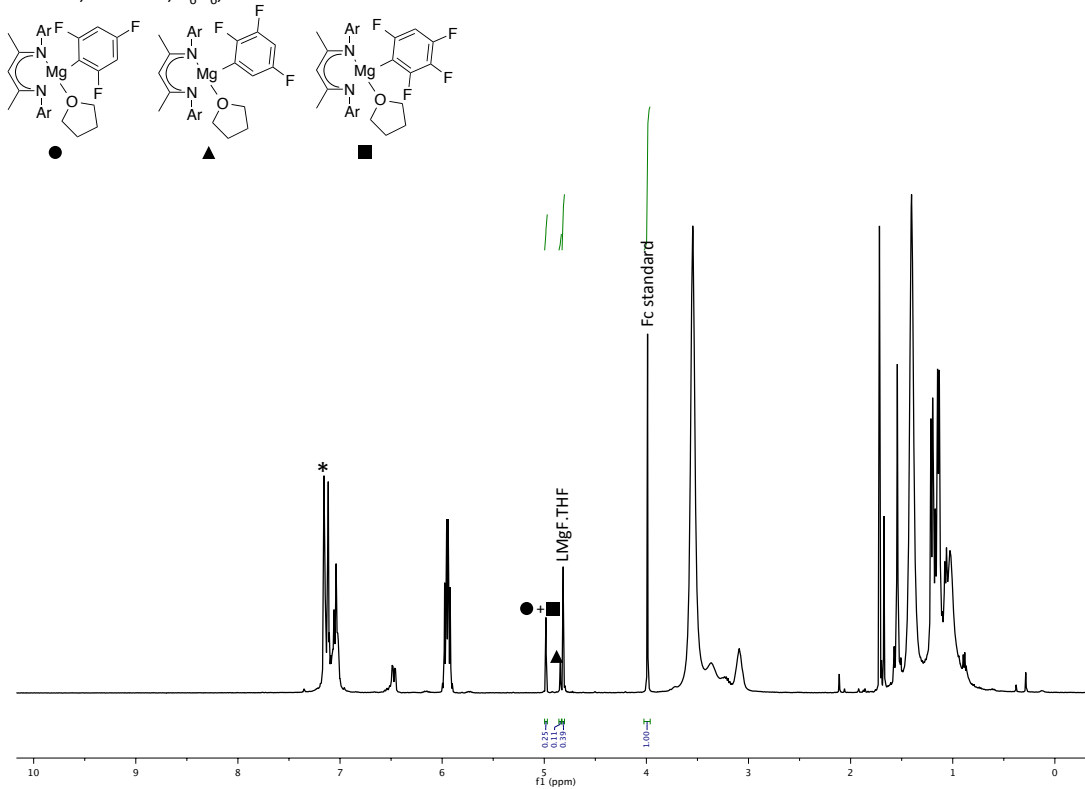

**Figure S54:**  $^{19}\text{F}$  NMR spectrum of the NMR scale formation of compounds **2k**, **2k'** and **2j'**.

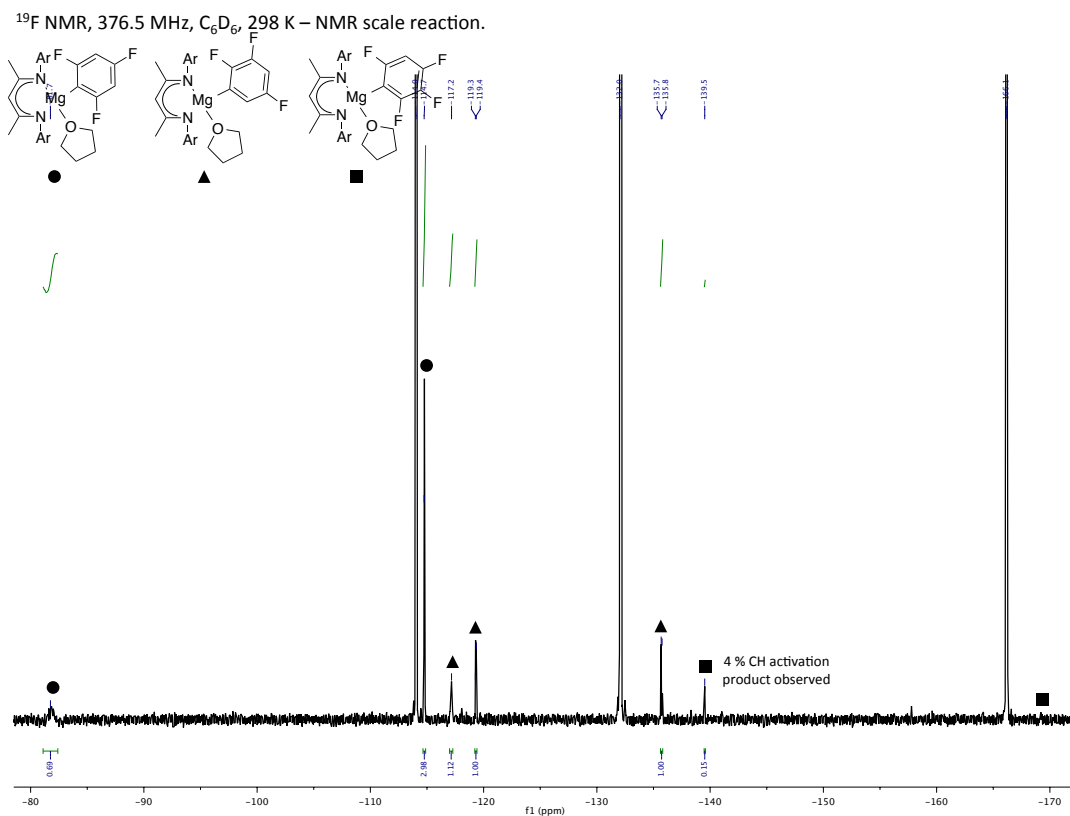

**Figure S55:**  $^1\text{H}$  NMR spectrum of isolated compounds **2k**, **2k'** and **2j'**; solvent peak marked with asterisk.

$^1\text{H}$  NMR, 400 MHz,  $\text{C}_6\text{D}_6$ , 298 K - Preparative scale reaction. Note: product ratios not representative of crude material.

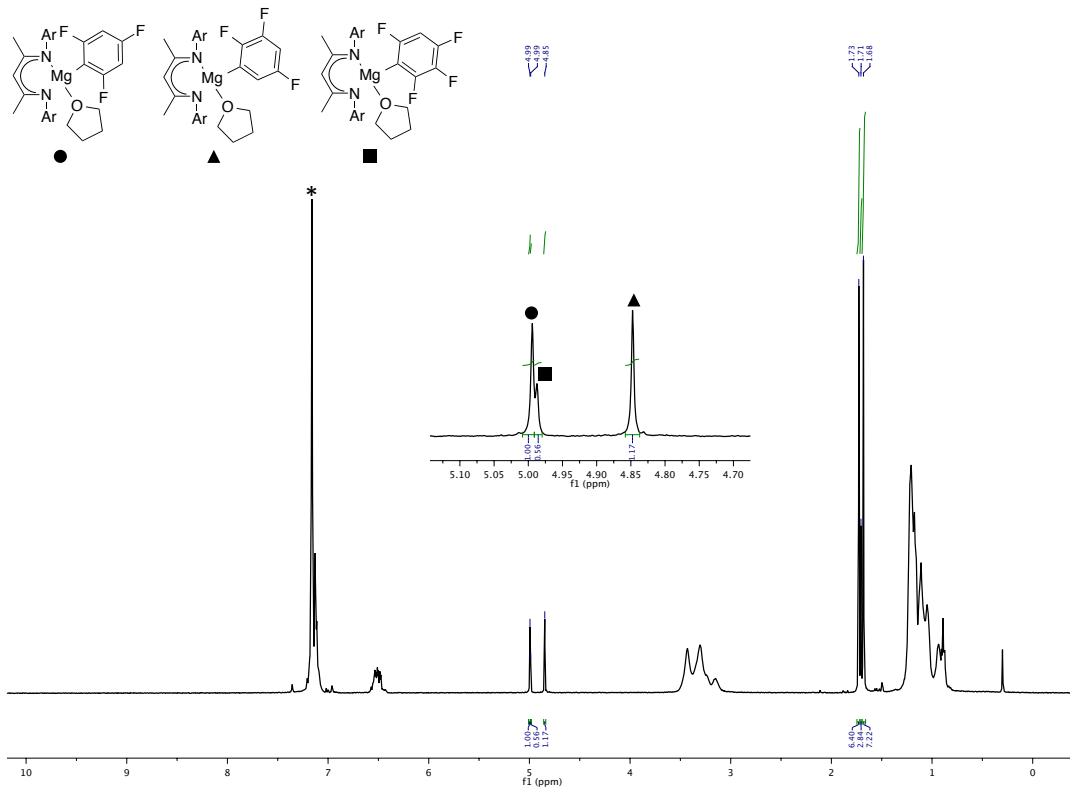

**Figure S56:**  $^{19}\text{F}$  NMR spectrum of isolated compounds **2k**, **2k'** and **2j'**.

$^{19}\text{F}$  NMR, 376.5 MHz,  $\text{C}_6\text{D}_6$ , 298 K - Preparative scale reaction. Note: product ratios not representative of crude material.

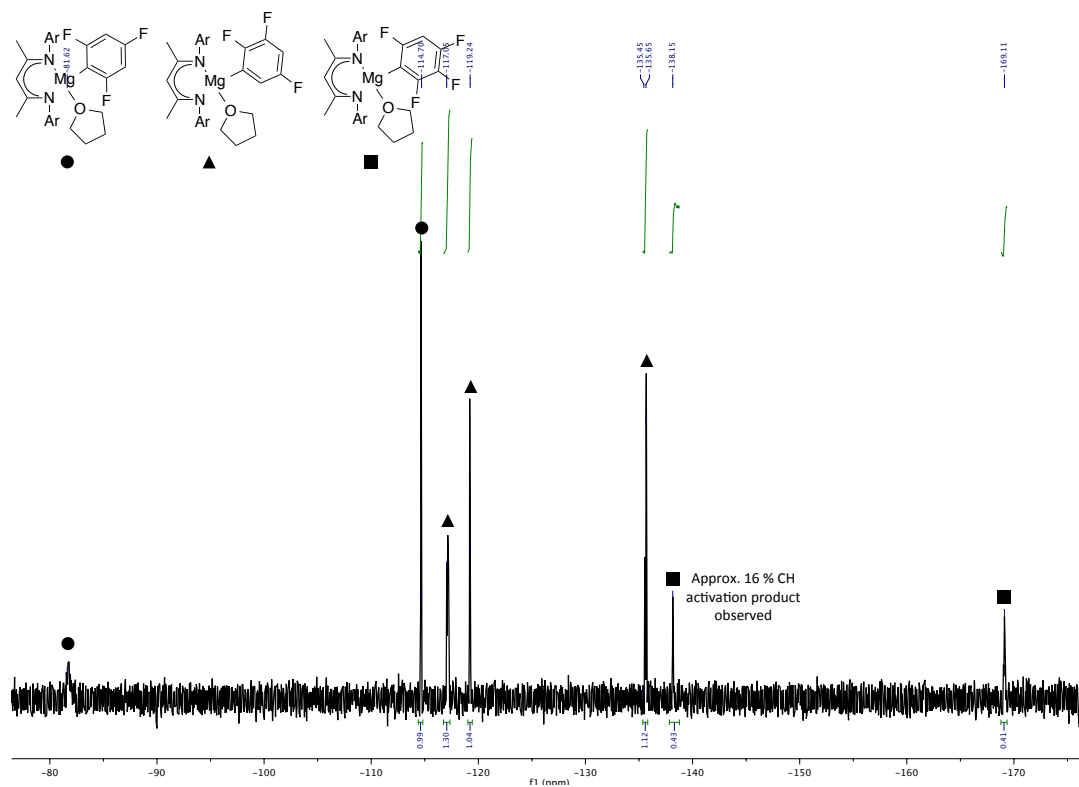

**Figure S57:**  $^{19}\text{F}$  NMR spectrum protonated **2k**, **2k'** and **2j'**.

$^{19}\text{F}$  NMR, 376.5 MHz,  $\text{C}_6\text{D}_6$ , 298 K - Preparative scale reaction + MeOH.

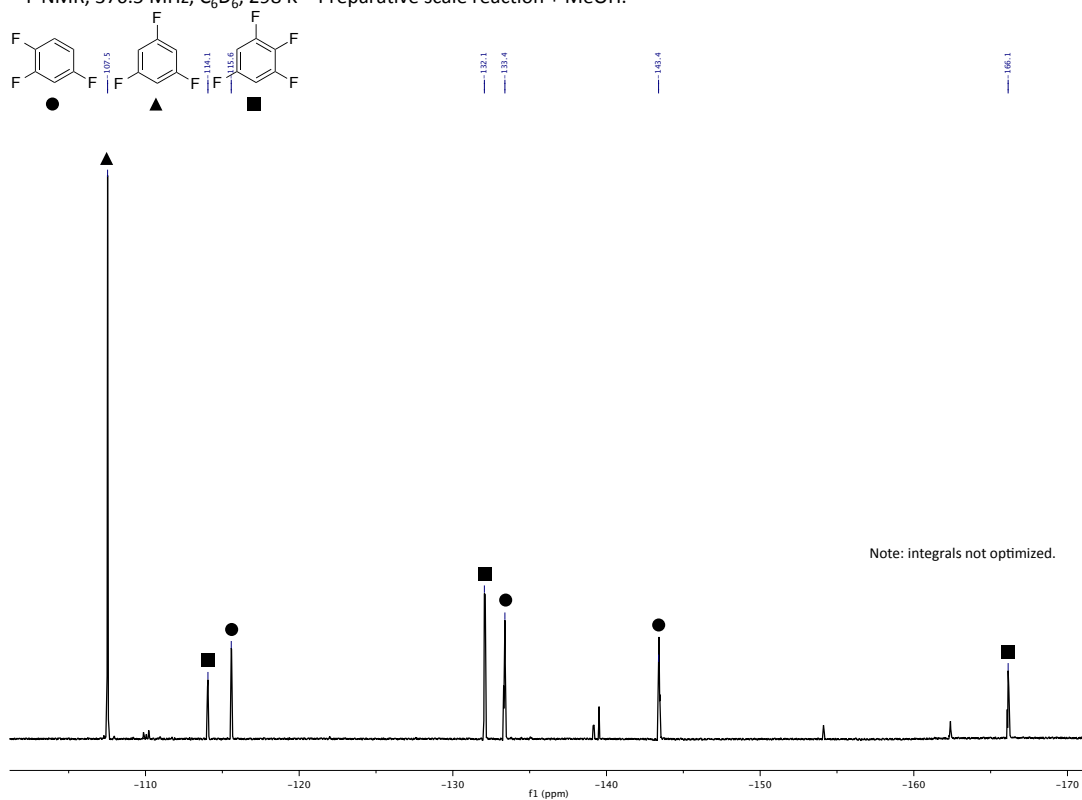

**Figure S58:**  $^1\text{H}$  NMR spectrum of compound **4**; solvent peak marked with asterisk.

$^1\text{H}$  NMR, 400 MHz,  $\text{C}_6\text{D}_6$ , 298 K

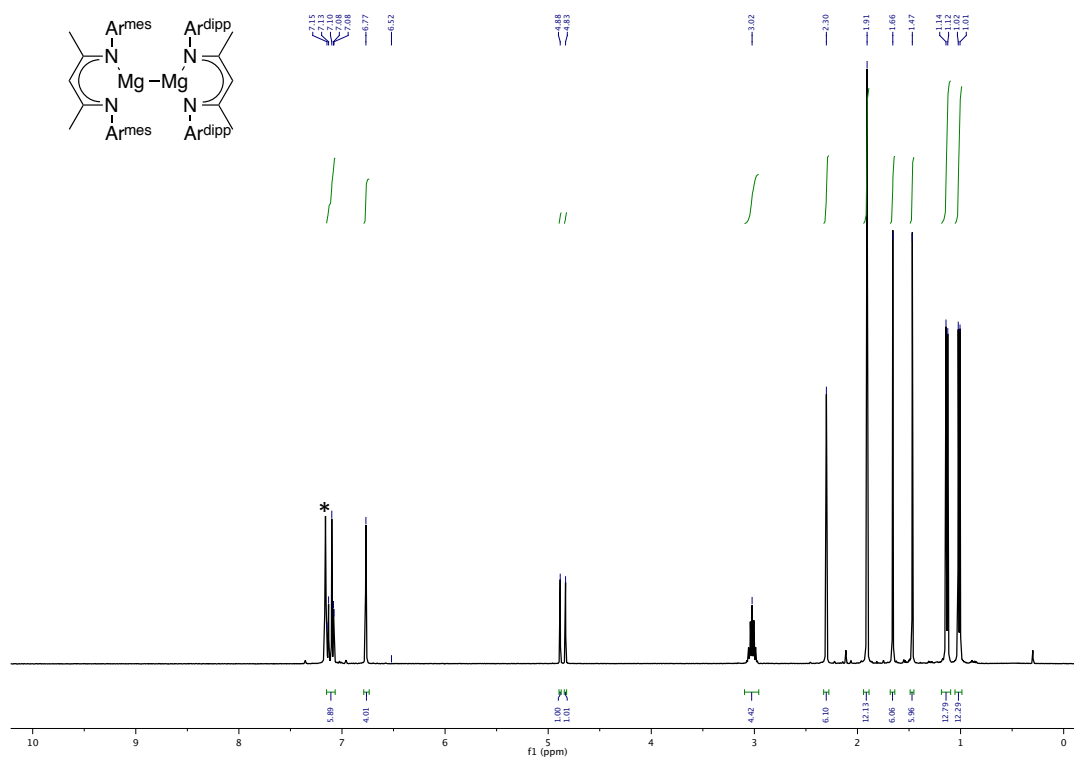

**Figure S59:**  $^{13}\text{C}\{^1\text{H}\}$  NMR spectrum of compound **4**.

$^{13}\text{C}\{^1\text{H}\}$  NMR, 100 MHz,  $\text{C}_6\text{D}_6$ , 298 K

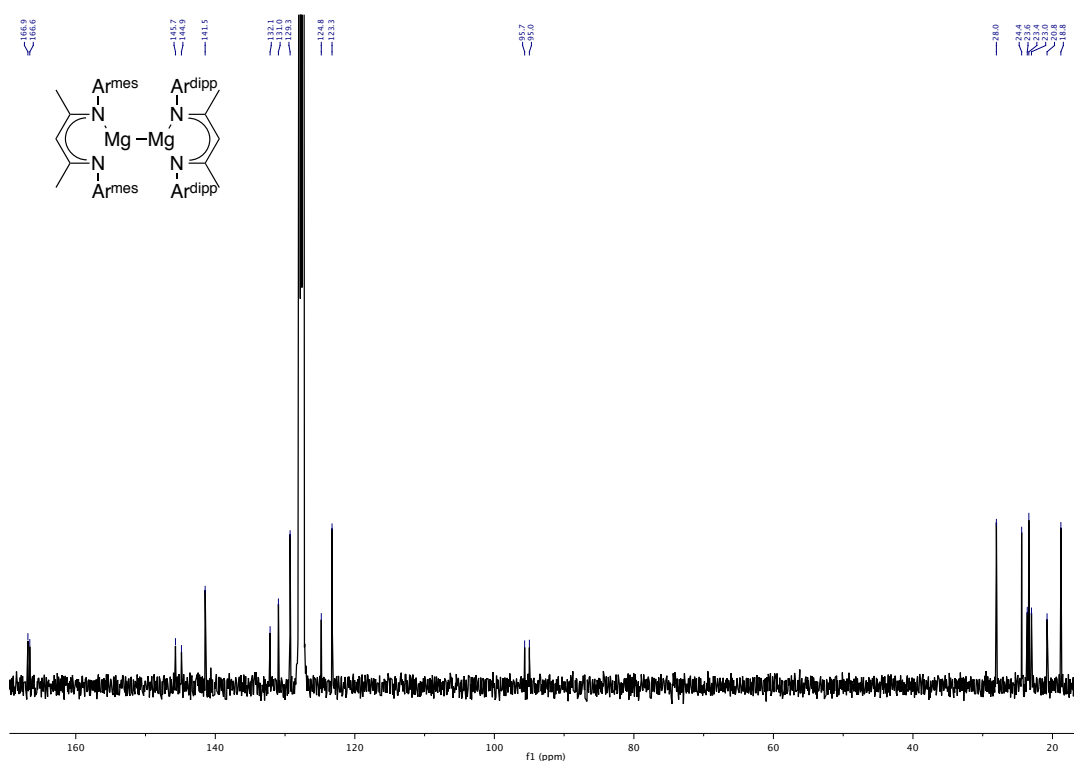

- 
- <sup>i</sup> Feldman, J.; McLain, S.J.; Parthasarathy, A.; Marshall, W. J.; Calabrese, J. C.; Arthur, S. D. *Organometallics*, **1997**, *16*, 1514-1515.
- <sup>ii</sup> Green, S. P.; S. J.; Jones, C.; Nembenna, S.; Stasch, A. *Science*, **2007**, *318*, 1754-1757.
- <sup>iii</sup> Bonyhady, S. J.; Jones, C.; Nembenna, S.; Stasch, A.; Edwards, A. J.; McIntyre, G. J. *Chem. Eur. J.*, **2010**, *16*, 938-955.
- <sup>iv</sup> Roberts, K. M.; Jones, J.P. *Chem. Eur. J.*, **2010**, 8096-8107.
- <sup>v</sup> Hao, H.; Roesky, H. W.; Ding, Y.; Cui, C.; Schormann, M.; Schmidt, H.G.; Noltemeyer, M.; Zemva, B. *J. Fluorine Chem.*, **2002**, *115*, 143-147.
- <sup>vi</sup> Recrystallized yield.
- <sup>vii</sup> *J* coupling presumed to arise from a through space interaction with the *ortho*-fluorine.
- <sup>viii</sup> Recrystallized yield.
- <sup>ix</sup> Product could not be isolated in high purity, due to high solubility in apolar solvents. For this reason only the NMR scale yield is recorded in Table S1.
- <sup>x</sup> Based on C–F activation products, but C–H activation product **2a** was also observed; 6 % for NMR scale reaction, 20% for preparative scale reaction in either silylated or non-silylated glassware.
- <sup>xi</sup> Based on C–F activation products, but C–H activation product **2j'** was also observed, 4% for NMR scale reaction, 16% for preparative scale reaction in non-silylated glassware.
- <sup>xii</sup> S.P. Green, C. Jones and A. Stasch, *Angew. Chem., Int. Ed.*, **2008**, *47*, 9079.
- <sup>xiii</sup> H. Hao, H.W. Roesky, Y. Ding, C. Cui, M. Schormann, H.-G. Schmidt, M. Noltemeyer and B. Zemva, *J. Fluorine Chem.*, **2002**, *115*, 143.
- <sup>xiv</sup> (a) SHELXTL, Bruker AXS, Madison, WI; (b) SHELX-97, G.M. Sheldrick, *Acta Cryst.*, **2008**, *A64*, 112-122; (c) SHELX-2013, G.M. Sheldrick, *Acta Cryst.*, **2015**, *C71*, 3-8.
